# Supplementary material for: Machine learning predictions of diffusion in bulk and confined ionic liquids using simple descriptors
Source: Royal Society of Chemistry journal article supplement (doi:10.1039/d3me00033h), 2023-01-01
Supplement: d3me00033h1.pdf [file d3me00033h1.pdf]

### Supporting Information

#### **Machine learning predictions of diffusion in bulk and confined ionic liquids using simple descriptors**

N. Scott Bobbitt<sup>1,^</sup>, Joshua P. Allers<sup>1</sup>, Jacob A. Harvey<sup>1</sup>, Derrick Poe<sup>2</sup>, Jordyn D. Wemhoner<sup>1</sup>, Jane Keth<sup>1</sup>, Jeffery A. Greathouse<sup>1,^</sup>

1. Sandia National Laboratories, Albuquerque, NM, 87185 USA

2. Argonne National Laboratory, Lemont, IL 60439

^corresponding authors:

NSB: sbobbit@sandia.gov JAG: jagreat@sandia.gov

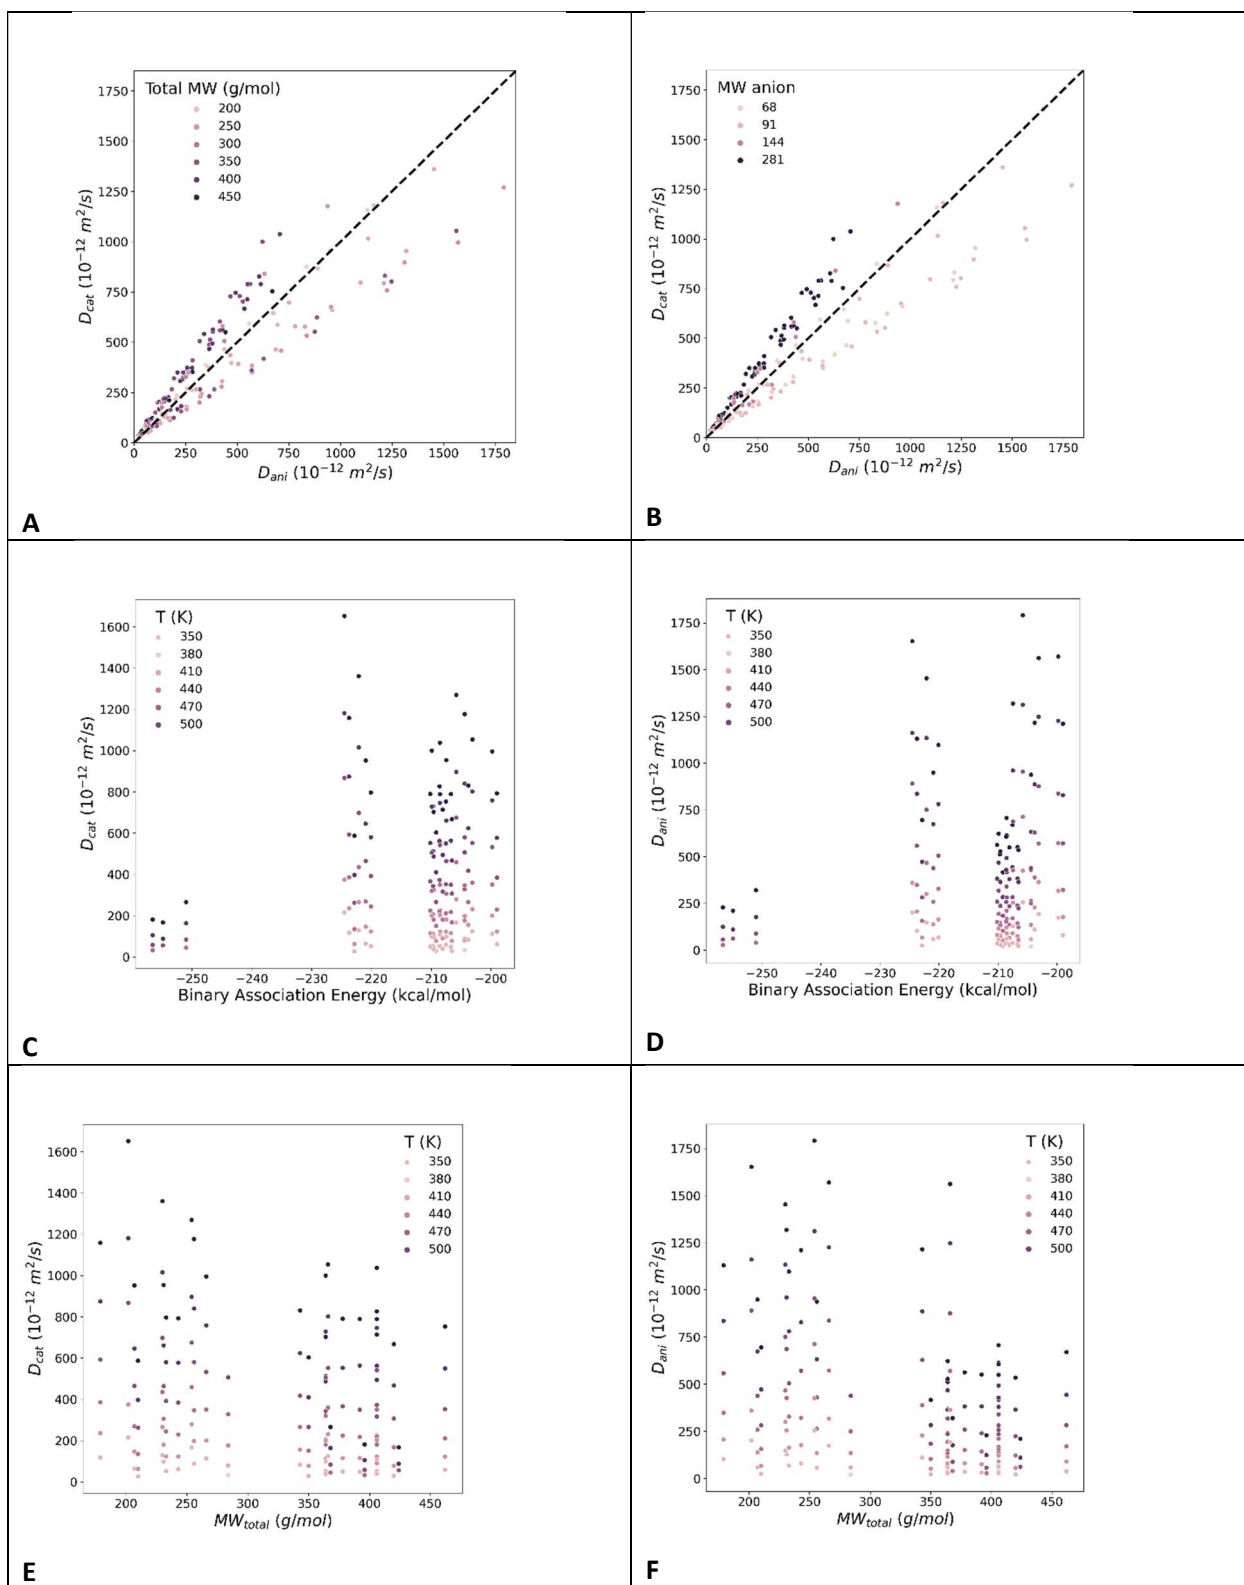

Supporting Figure 1: Correlation between  $D_{cat}$  and  $D_{ani}$  for bulk ILs: ion molecular weight (MW) for A) cation and B) anion, binary association energy for C) cations and D) anions, ion pair molecular weight for E) cations and F) anions.

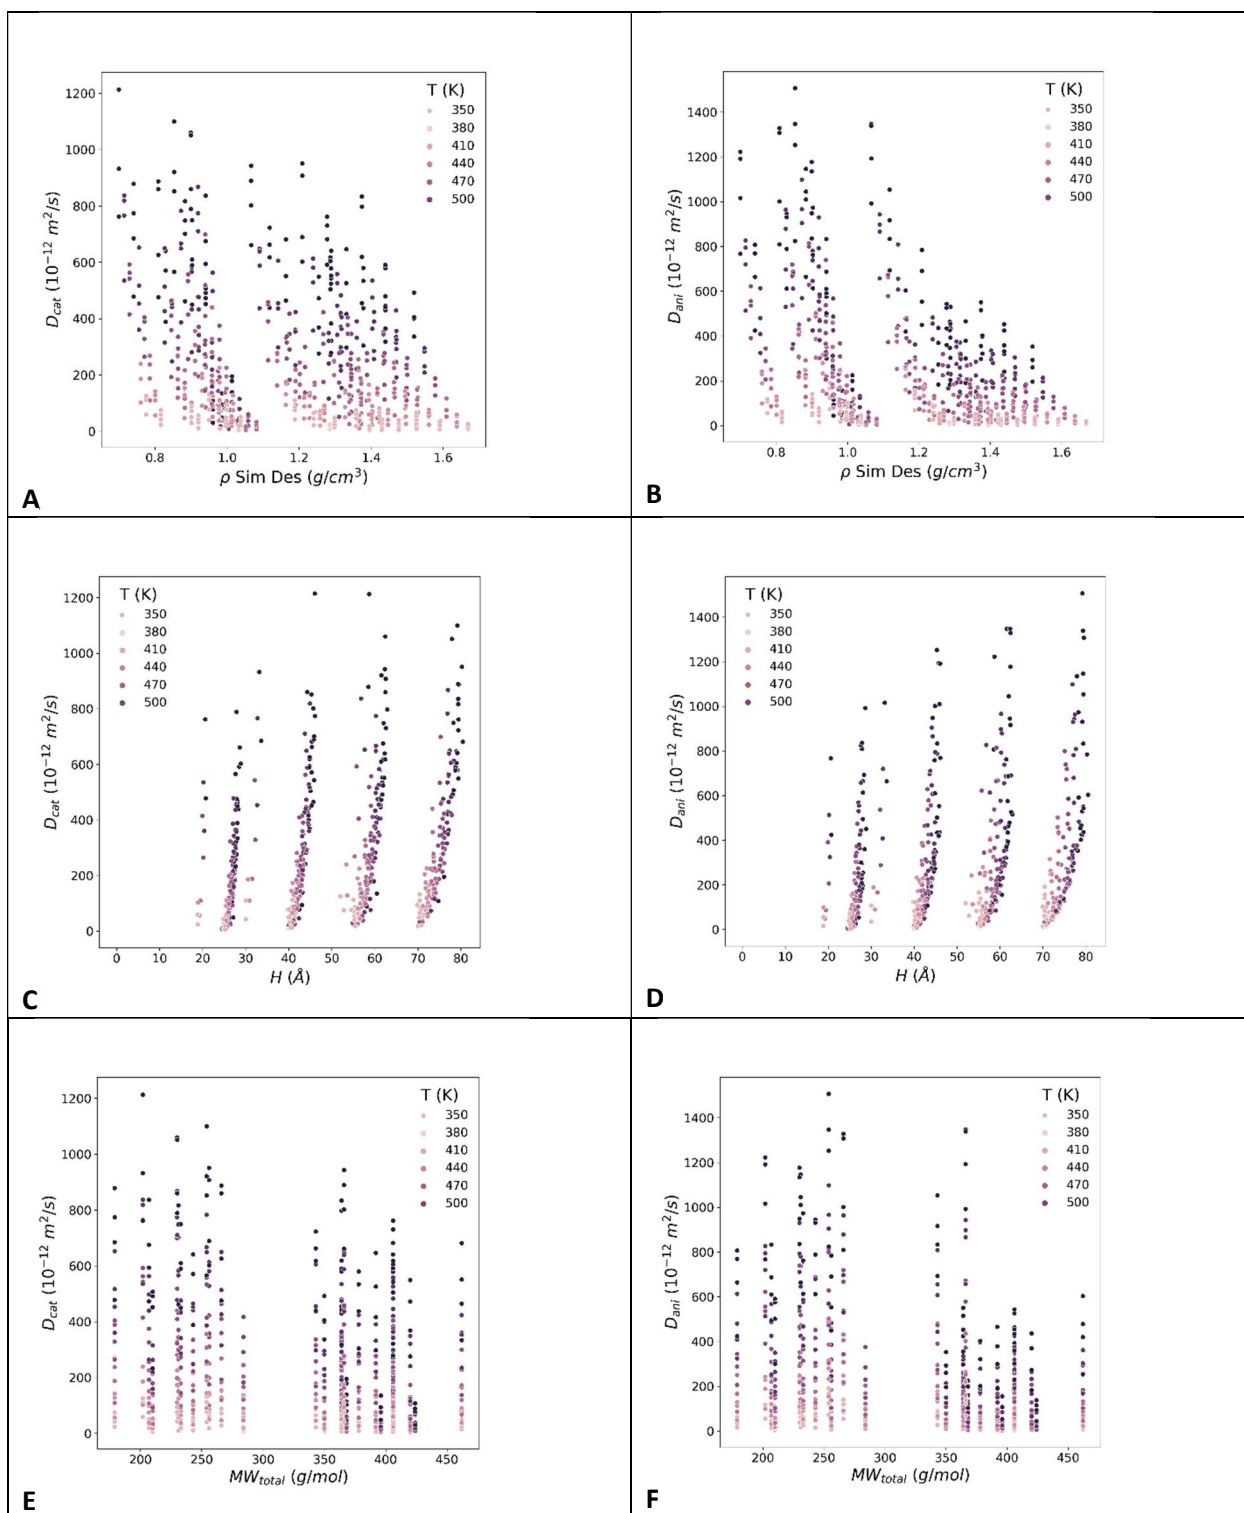

Supporting Figure 2: Correlations of  $D_{\text{cat}}$  and  $D_{\text{anis}}$  in confined ILs with fluid density (A, B), slit pore height (C, D), and IL molecular weight (E, F)

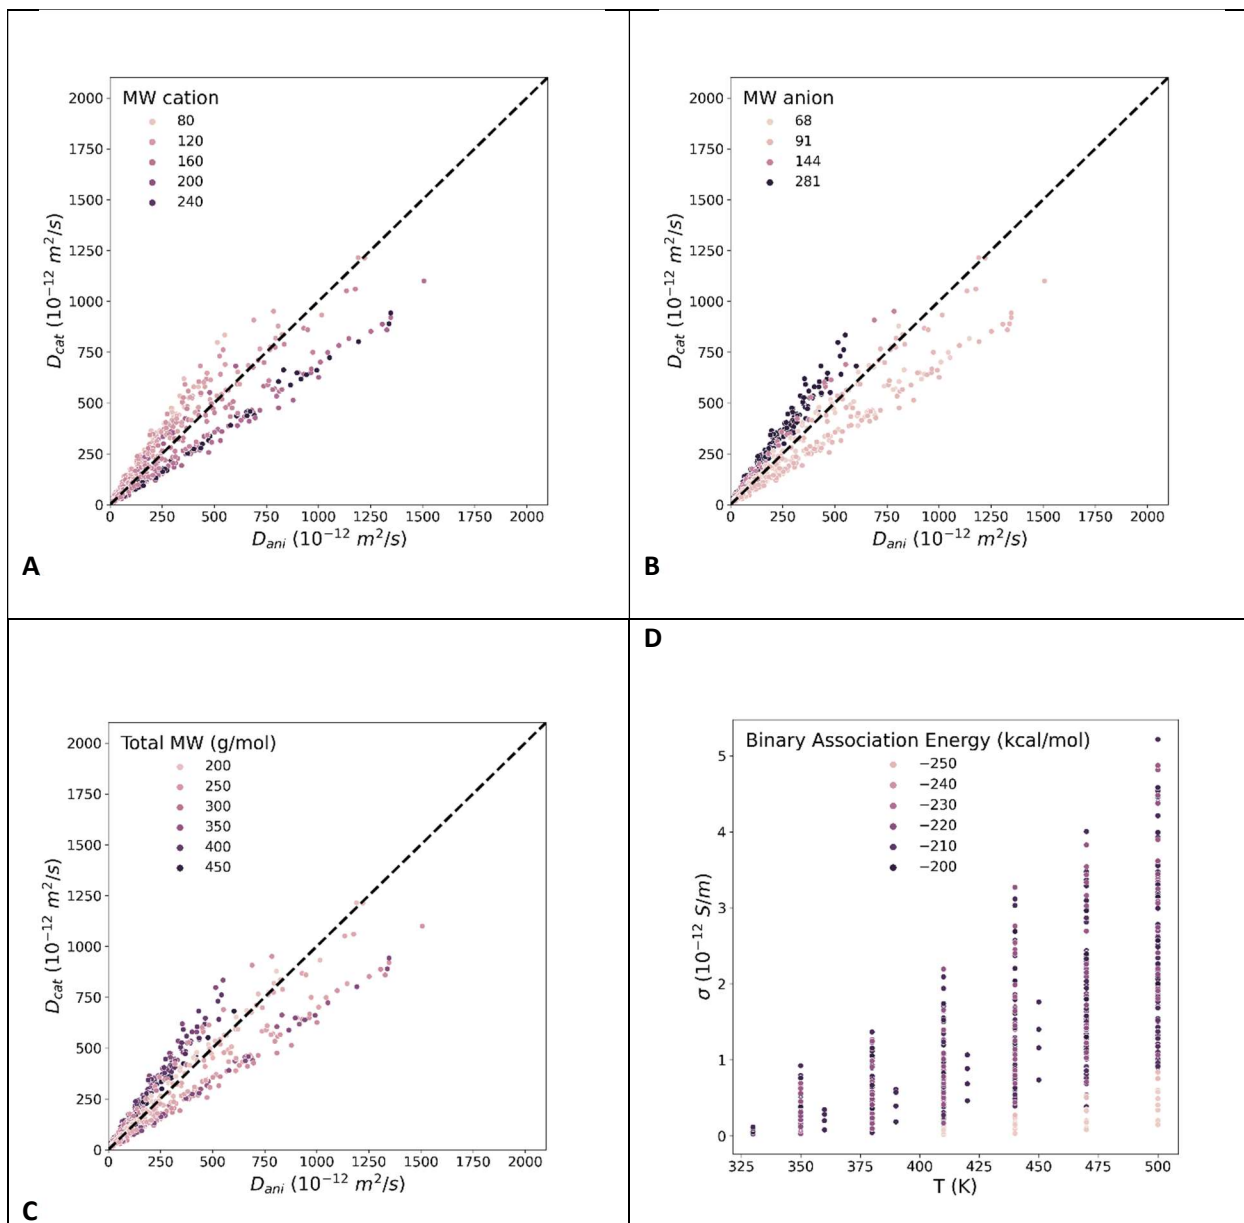

Supporting Figure 3: MD results for IL diffusion in slit pores. A)  $D_{cat}$  vs  $D_{ani}$ , color cation molecular weight, B)  $D_{cat}$  vs  $D_{ani}$ , color anion molecular weight, C)  $D_{cat}$  vs  $D_{ani}$ , color total IL molecular weight, D)  $D$  vs temperature with color as binary association energy

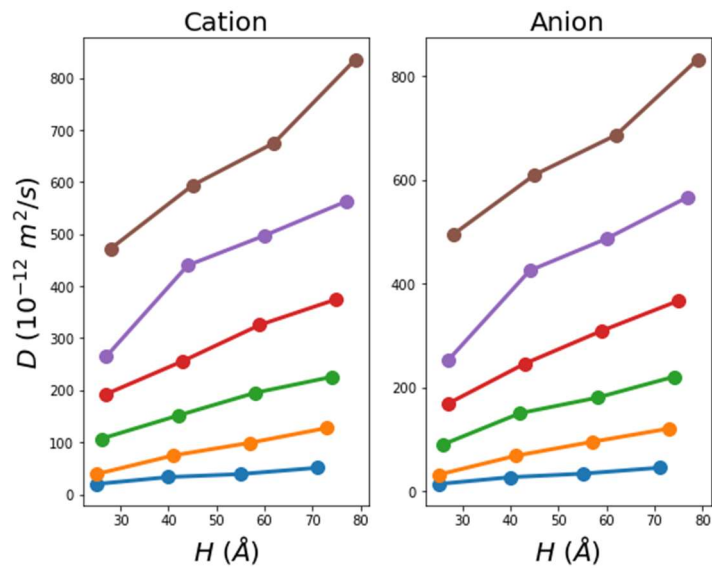

**A**

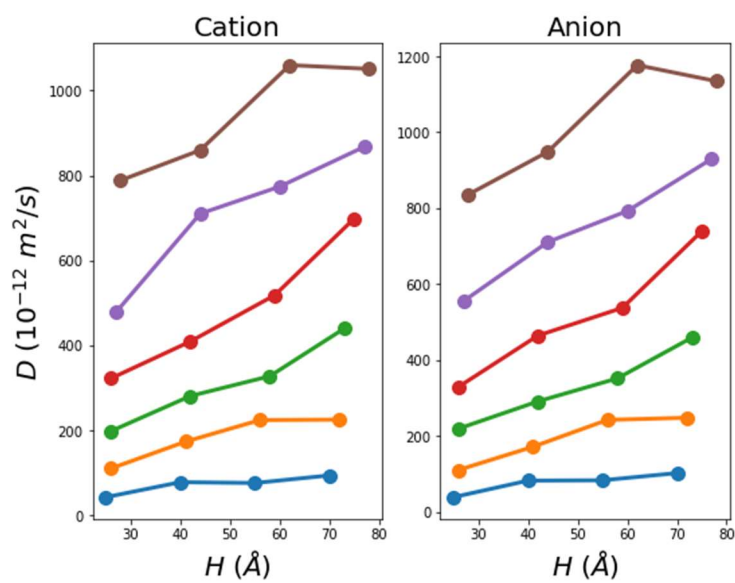

**B**

Supporting Figure 4: Results from MD simulations of A) IL22 and B) IL28 confined in graphite slit pores, showing trends of cation and anion diffusion with slit pore height ( $H$ ) and temperature (colors, blue 350 K, orange 380 K, green 410 K, red 440 K, purple 470 K, brown 500 K)

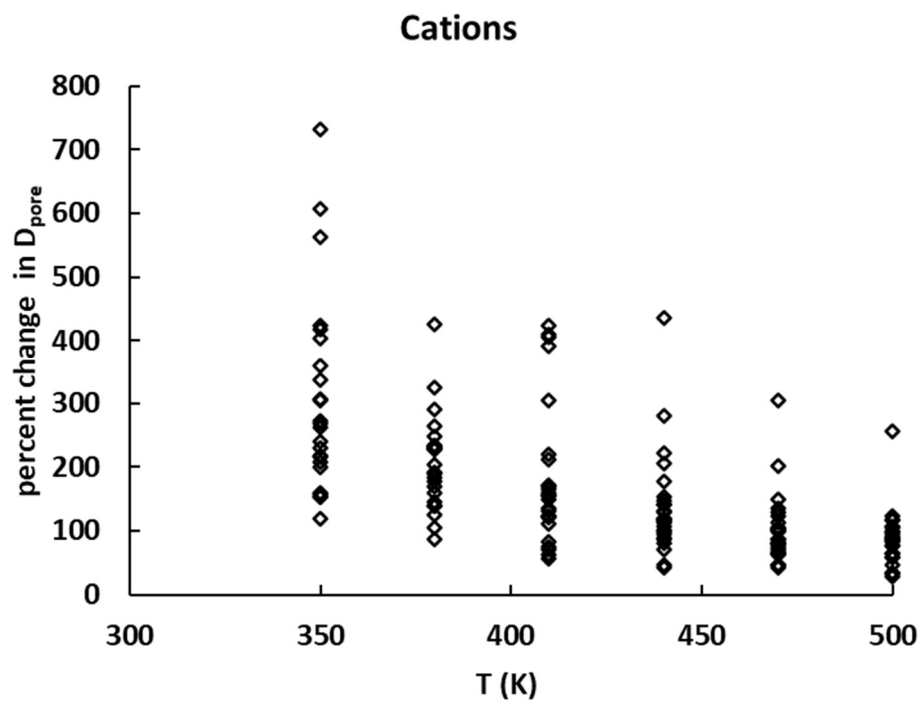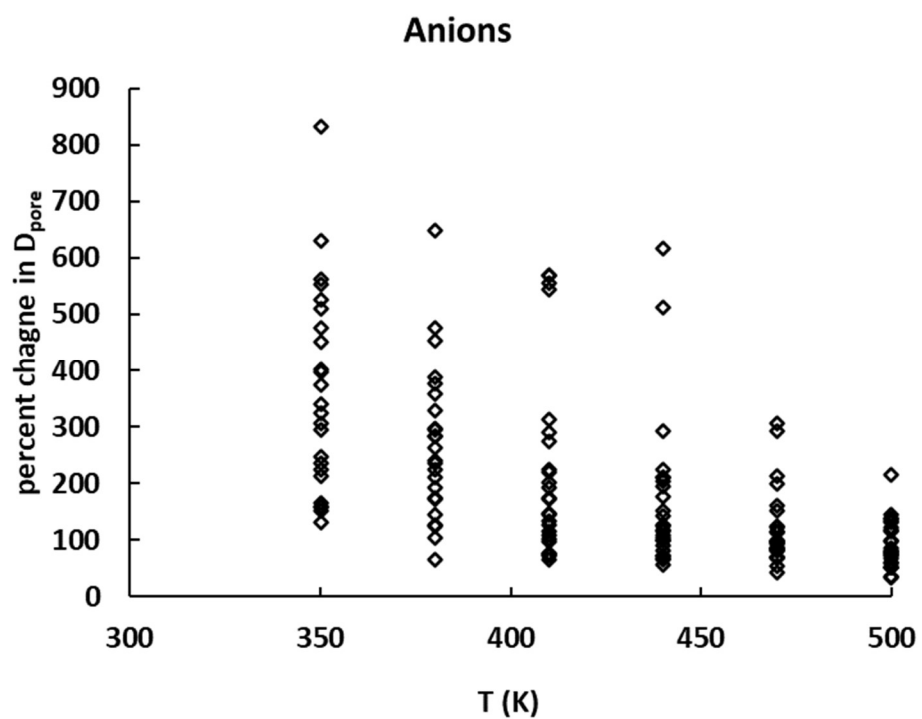

Supporting Figure 5: Percent change in  $D_{\text{slit pore}}$  values between small slit pore ( $\sim 25 \text{ \AA}$ ) and large slit pore ( $\sim 75 \text{ \AA}$ ) at each temperature for cations and anions

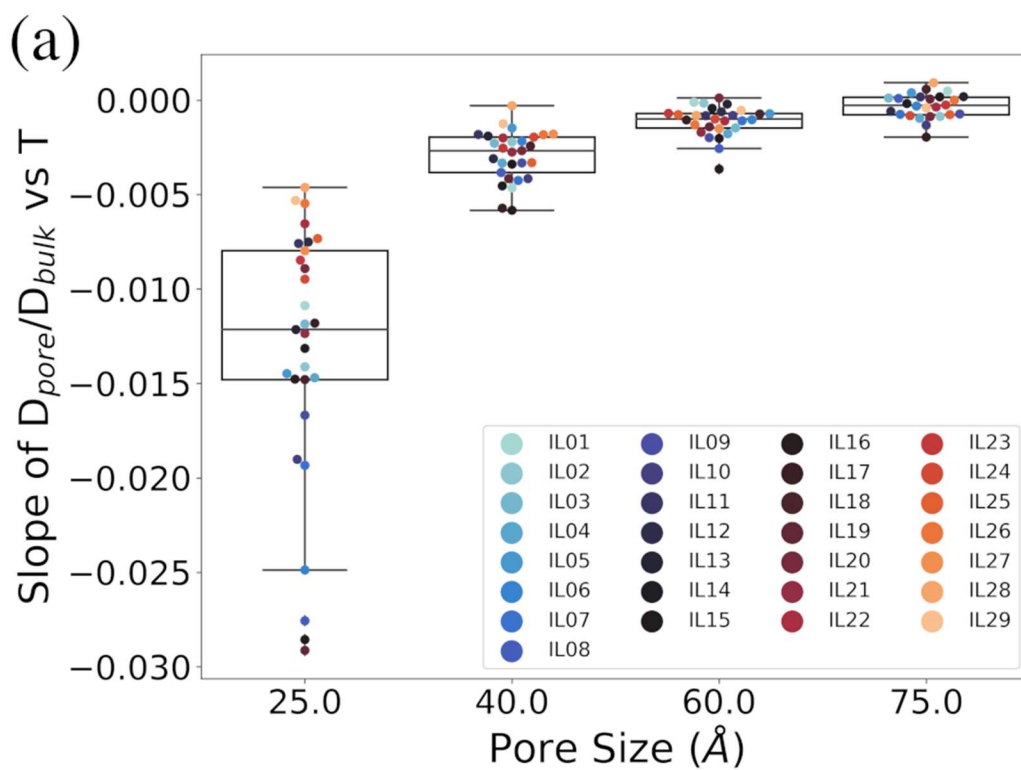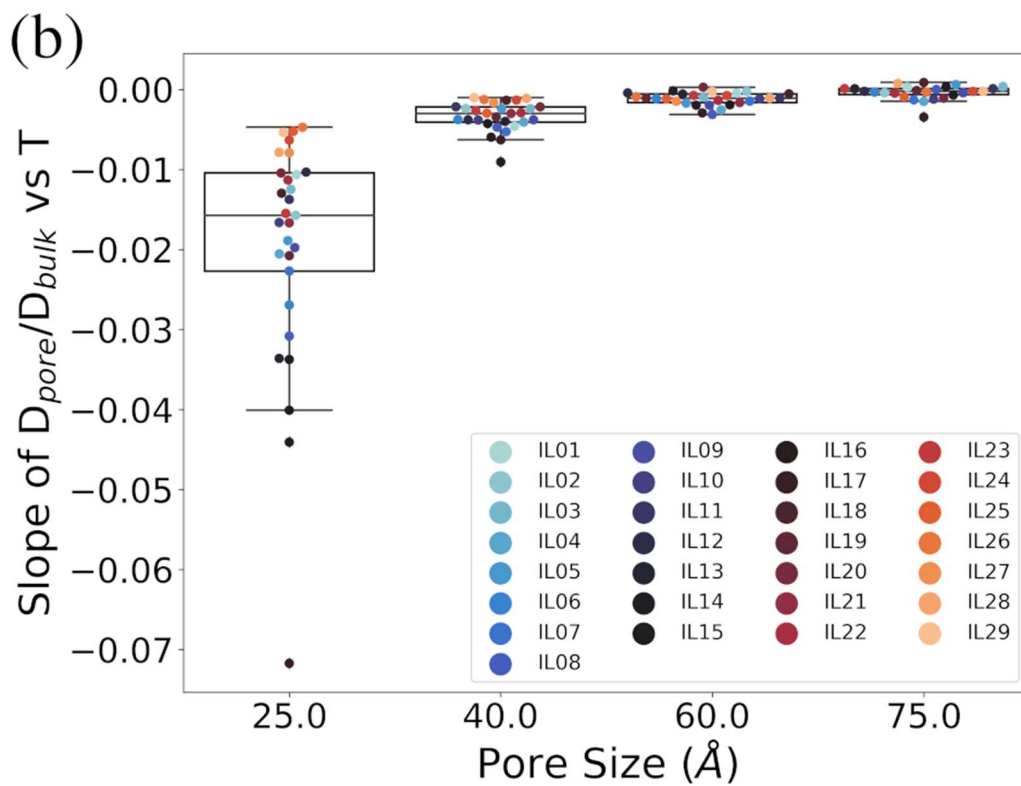

Supporting Figure 6: The slope of  $D_{pore}/D_{bulk}$  versus temperature for each ionic liquid ((a) cation, (b) anion) at each pore size. Box plots are shown to indicate the distribution of slopes across all ionic liquids for each pore size.

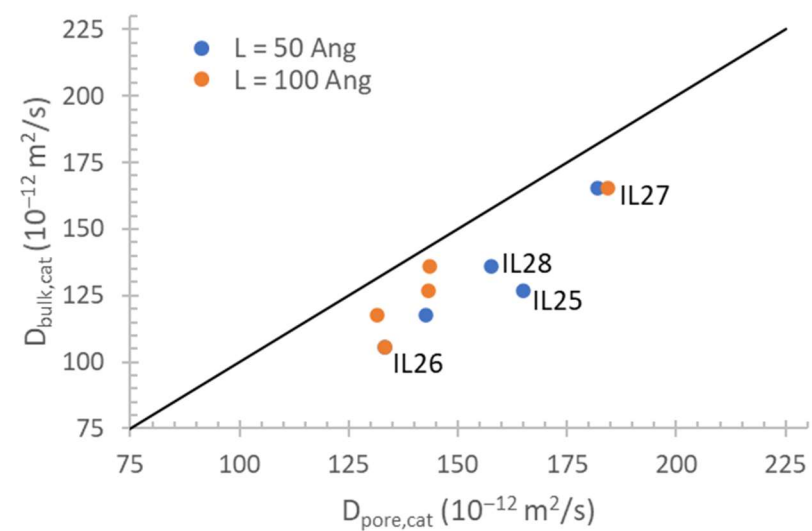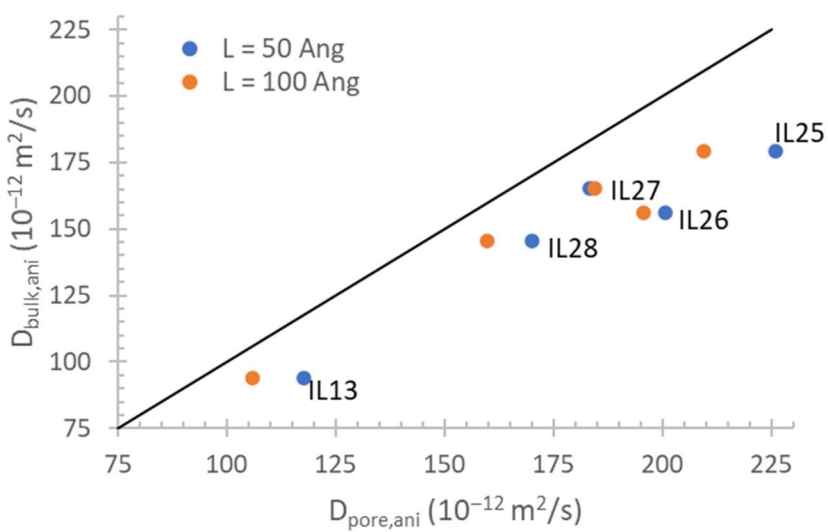

Supporting Figure 7: Parity plots showing cation (top) and anion (bottom) diffusion coefficients for bulk and slit pore fluids with lateral periodic system sizes of 50 Å and 100 Å



**A**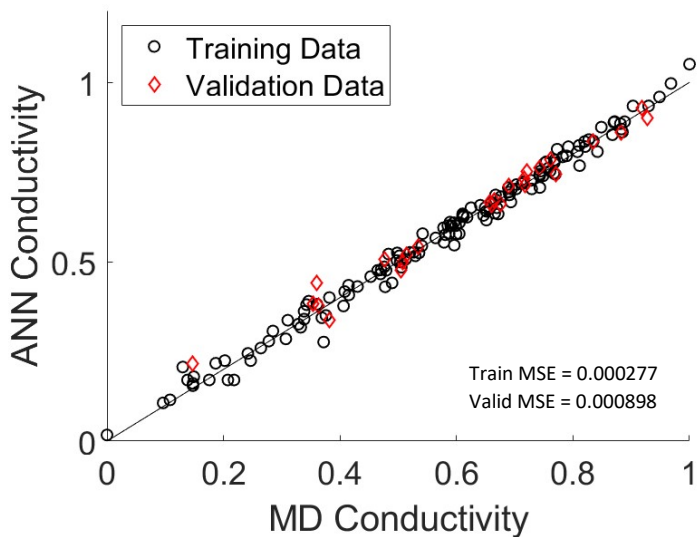**B**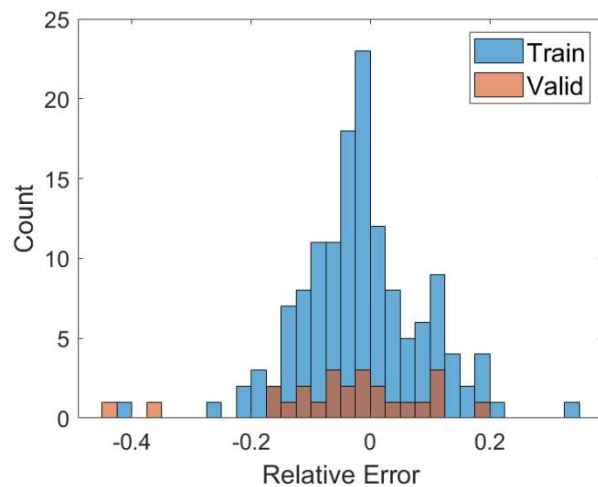**C**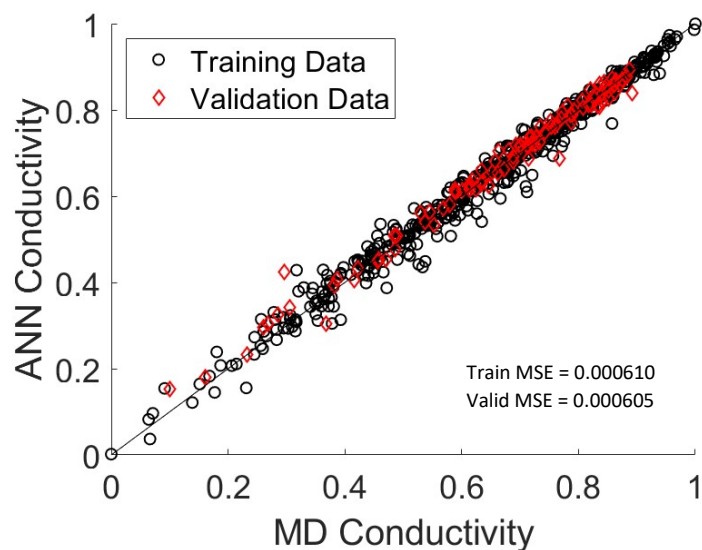**D**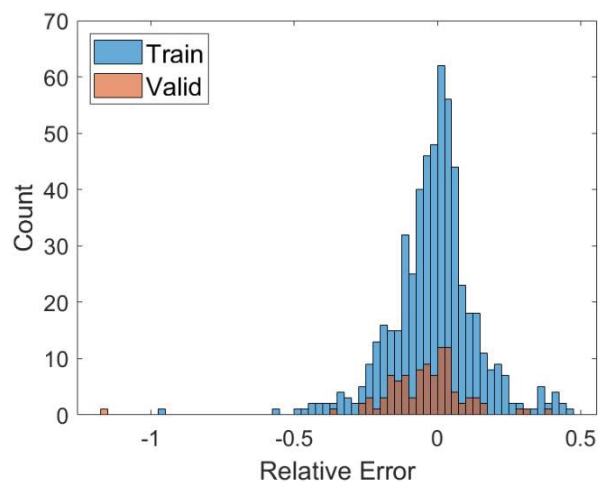

Supporting Figure 8: A) parity plot of conductivity ( $\sigma$ ) predicted from ANN vs computed from diffusion coefficients from MD simulations using SMILES descriptors for bulk ILs and C) ILs confined in slit pores. B) Distribution of relative errors for bulk ILs, D) distribution of relative errors for confined ILs

Supporting Table 1: Composition of ionic liquids, MD run times, and temperatures

| IL | cation                             | anion  | MD run times and temperatures                              |
|----|------------------------------------|--------|------------------------------------------------------------|
| 1  | imidazolium                        | [Tf2N] | 20 ns (440 K, 470 K, 500 K)<br>40 ns (350 K, 380 K, 410 K) |
| 2  | 1-methylimidazolium                | [Tf2N] | 20 ns (440 K, 470 K, 500 K)<br>40 ns (350 K, 380 K, 410 K) |
| 3  | 4-methylimidazolium                | [Tf2N] | 20 ns (440 K, 470 K, 500 K)<br>40 ns (350 K, 380 K, 410 K) |
| 4  | 1,3-dimethylimidazolium            | [Tf2N] | 20 ns (440 K, 470 K, 500 K)<br>40 ns (350 K, 380 K, 410 K) |
| 5  | 1,2-dimethylimidazolium            | [Tf2N] | 20 ns (440 K, 470 K, 500 K)<br>40 ns (350 K, 380 K, 410 K) |
| 6  | 1,2,3-trimethylimidazolium         | [Tf2N] | 20 ns (440 K, 470 K, 500 K)<br>40 ns (350 K, 380 K, 410 K) |
| 7  | 1,3,4,5-tetramethylimidazolium     | [Tf2N] | 20 ns (440 K, 470 K, 500 K)<br>40 ns (350 K, 380 K, 410 K) |
| 8  | 1,2,3,4-tetramethylimidazolium     | [Tf2N] | 20 ns (440 K, 470 K, 500 K)<br>40 ns (350 K, 380 K, 410 K) |
| 9  | 1,2,4,5-tetramethylimidazolium     | [Tf2N] | 20 ns (440 K, 470 K, 500 K)<br>40 ns (350 K, 380 K, 410 K) |
| 10 | 1,2,3,4,5-pentamethylimidazolium   | [Tf2N] | 20 ns (440 K, 470 K, 500 K)<br>40 ns (350 K, 380 K, 410 K) |
| 11 | 1,3-diethylimidazolium             | [Tf2N] | 20 ns (440 K, 470 K, 500 K)<br>40 ns (350 K, 380 K, 410 K) |
| 12 | 1,3-n-dibutylimidazolium           | [Tf2N] | 20 ns (440 K, 470 K, 500 K)<br>40 ns (350 K, 380 K, 410 K) |
| 13 | 1-ethyl-3-methylimidazolium        | [PF6]  | 20 ns (440 K, 470 K, 500 K)<br>40 ns (350 K, 380 K, 410 K) |
| 14 | 1-n-butyl-3-methylimidazolium      | [PF6]  | 20 ns (420 K, 450 K)<br>40 ns (330 K, 360 K, 390 K)        |
| 15 | 1-n-decyl-3-methylimidazolium      | [PF6]  | 20 ns (470 K, 500 K)<br>40 ns (410 K, 440 K)               |
| 16 | 1-n-dodecyl-3-methylimidazolium    | [PF6]  | 20 ns (500 K)<br>40 ns (410 K, 440 K, 470 K)               |
| 17 | 1-n-tetradecyl-3-methylimidazolium | [PF6]  | 40 ns (440 K, 470 K, 500 K)                                |

[Tf2N] bis(trifluoromethanesulfonyl)imide

[PF6] hexafluorophosphate

Supporting Table 1 (continued): Composition of ionic liquids, MD run times, and temperatures

| IL | cation                                       | anion     | MD run times and temperatures                              |
|----|----------------------------------------------|-----------|------------------------------------------------------------|
| 18 | triethylbutylphosphonium                     | [124triz] | 20 ns (440 K, 470 K, 500 K)<br>40 ns (350 K, 380 K, 410 K) |
| 19 | (methyloxymethyl)triethylphosphonium         | [124triz] | 20 ns (440 K, 470 K, 500 K)<br>40 ns (350 K, 380 K, 410 K) |
| 20 | triethyl((2-methoxyethoxy)methyl)phosphonium | [124triz] | 20 ns (440 K, 470 K, 500 K)<br>40 ns (350 K, 380 K, 410 K) |
| 21 | 1-ethyl-3-methylimidazolium                  | [124triz] | 20 ns (440 K, 470 K, 500 K)<br>40 ns (350 K, 380 K, 410 K) |
| 22 | 1-n-butyl-3-methylimidazolium                | [124triz] | 20 ns (440 K, 470 K, 500 K)<br>40 ns (350 K, 380 K, 410 K) |
| 23 | 1-n-butyl-1-methylpyrrolidinium              | [124triz] | 20 ns (440 K, 470 K, 500 K)<br>40 ns (350 K, 380 K, 410 K) |
| 24 | triethylbutylphosphonium                     | [CNPyr]   | 20 ns (440 K, 470 K, 500 K)<br>40 ns (350 K, 380 K, 410 K) |
| 25 | (methyloxymethyl)triethylphosphonium         | [CNPyr]   | 20 ns (440 K, 470 K, 500 K)<br>40 ns (350 K, 380 K, 410 K) |
| 26 | triethyl((2-methoxyethoxy)methyl)phosphonium | [CNPyr]   | 20 ns (440 K, 470 K, 500 K)<br>40 ns (350 K, 380 K, 410 K) |
| 27 | 1-ethyl-3-methylimidazolium                  | [CNPyr]   | 20 ns (440 K, 470 K, 500 K)<br>40 ns (350 K, 380 K, 410 K) |
| 28 | 1-n-butyl-3-methylimidazolium                | [CNPyr]   | 20 ns (440 K, 470 K, 500 K)<br>40 ns (350 K, 380 K, 410 K) |
| 29 | 1-n-butyl-1-methylpyrrolidinium              | [CNPyr]   | 20 ns (440 K, 470 K, 500 K)<br>40 ns (350 K, 380 K, 410 K) |

[124triz] 1,2,4-triazolide

[CNPyr] 2-(cyano)pyrrolide

Supporting Table 2: Structure diagrams of A) 1,2,4-triazolide, B) 2-(cyano)pyrrolide, C) bis(trifluoromethanesulfonyl)imide, D) hexafluorophosphate

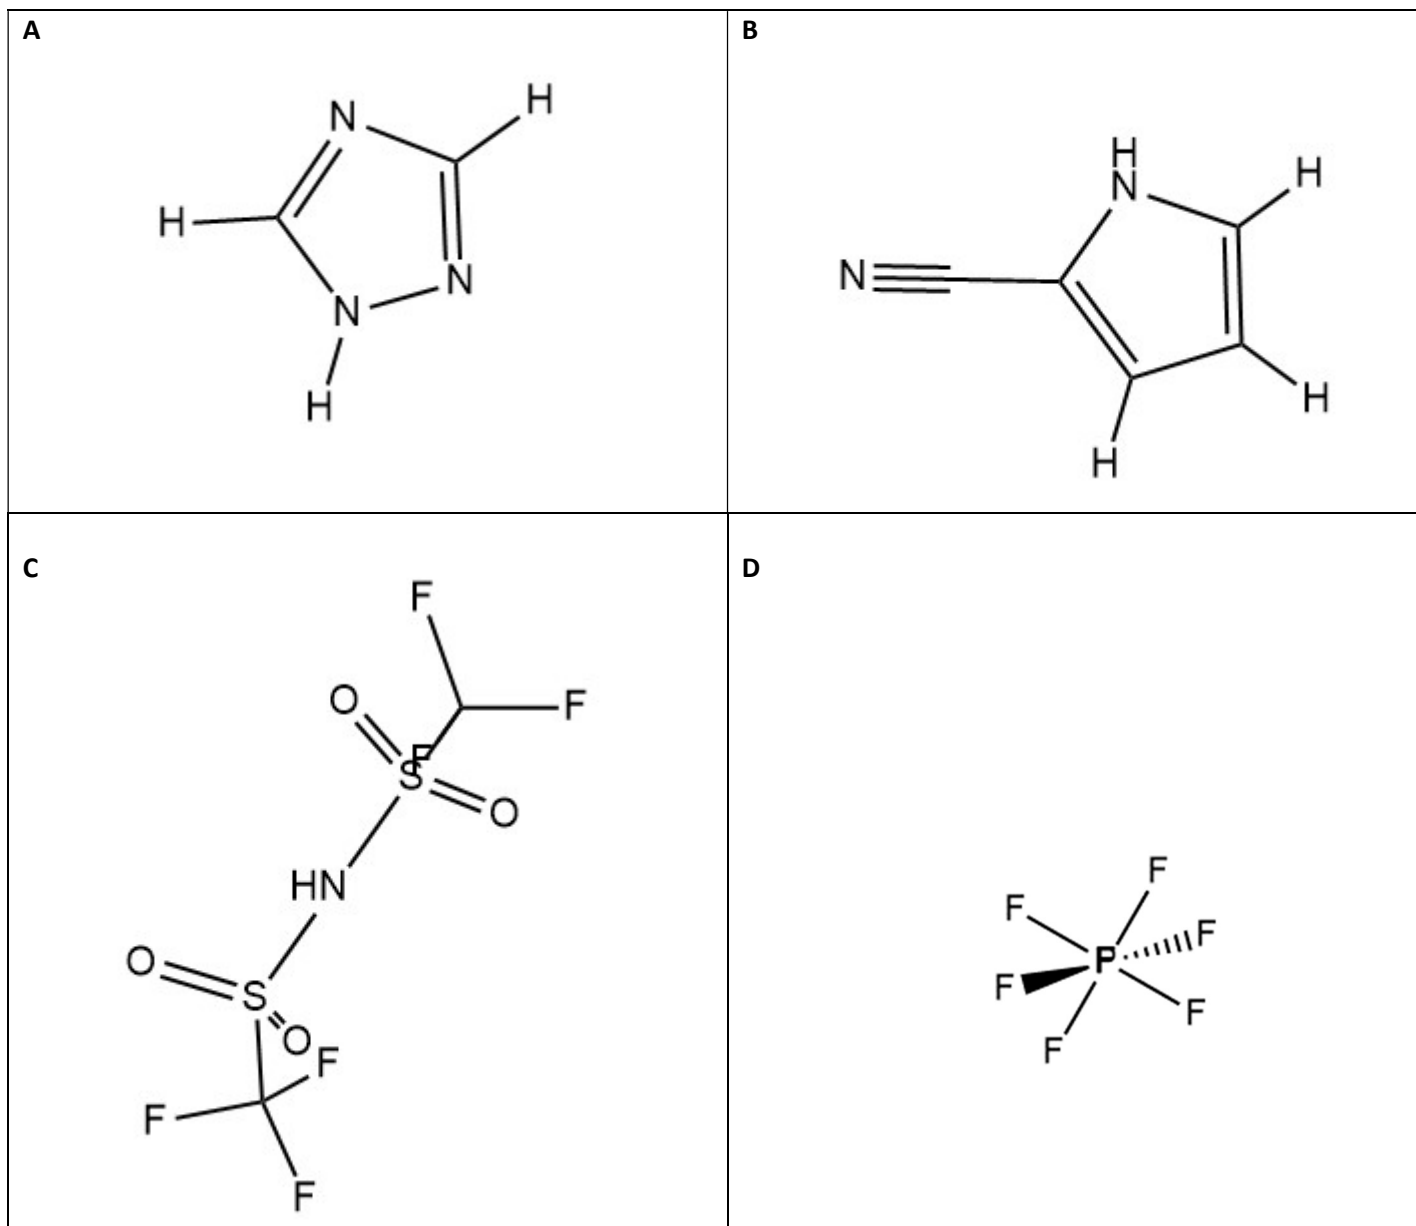

Supporting Table 3: Structure diagrams of A) (methyloxymethyl)triethylphosphonium, B) 1,2,3,4,5-pentamethylimidazolium, C) 1,2,3,4-tetramethylimidazolium, D) 1,2,3-trimethylimidazolium, E) 1,2,4,5-tetramethylimidazolium, F) 1,2-dimethylimidazolium, G) 1,3,4,5-tetramethylimidazolium, H) 1,3-diethylimidazolium, I) 1,3-dimethylimidazolium, J) 1-ethyl-3-methylimidazolium, K) 1-methylimidazolium, L) 1-n-butyl-1-methylpyrrolidinium, M) 1-n-butyl-3-methylimidazolium, N) 1-n-decyl-3-methylimidazolium, O) 1-n-dodecyl-3-methylimidazolium, P) 1-n-tetradecyl-3-methylimidazolium, Q) 4-methylimidazolium, R) imidazolium, S) triethyl((2-methoxyethoxy)methyl)phosphonium, T) triethylbutylphosphonium

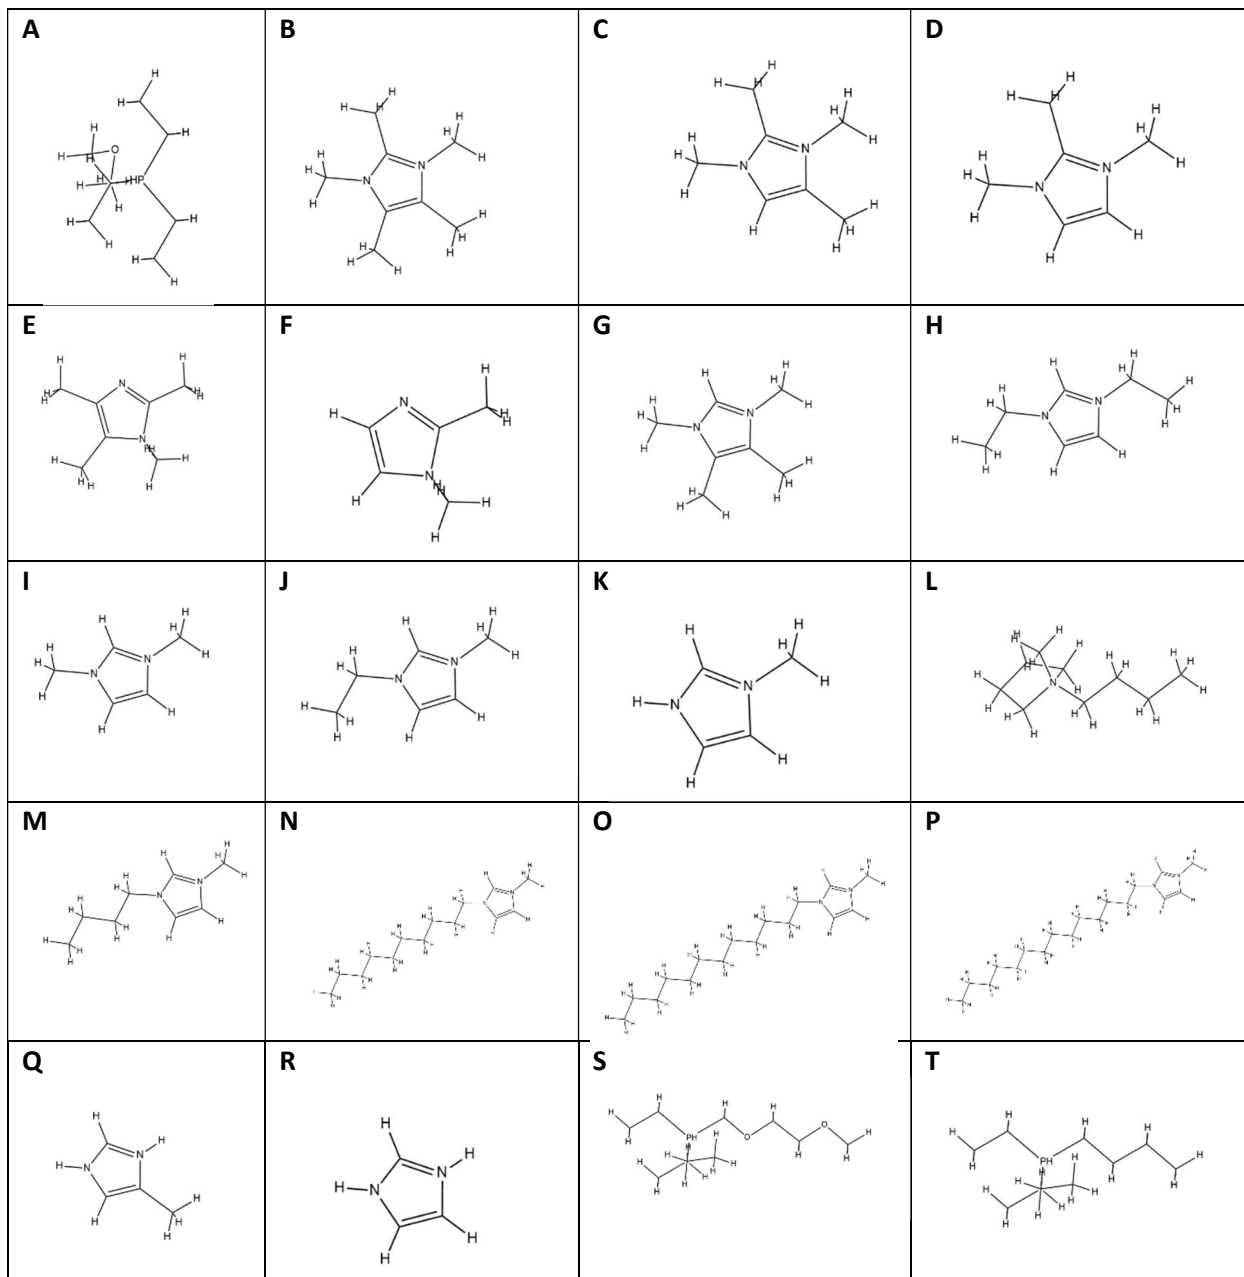

Supporting Table 4: Regression coefficients for ANN model predictions

| <b>descriptors</b> | <b>system</b> | <b>ion</b> | <b>train</b> | <b>valid</b> |
|--------------------|---------------|------------|--------------|--------------|
| calculated         | bulk          | cation     | 0.9980       | 0.9972       |
| calculated         | bulk          | anion      | 0.9992       | 0.9979       |
| calculated         | slit pore     | cation     | 0.9952       | 0.9932       |
| calculated         | slit pore     | anion      | 0.9959       | 0.9957       |
| SMILES             | bulk          | cation     | 0.9973       | 0.9938       |
| SMILES             | bulk          | anion      | 0.9975       | 0.9926       |
| SMILES             | slit pore     | cation     | 0.9946       | 0.9925       |
| SMILES             | slit pore     | anion      | 0.9955       | 0.9954       |
| SMILES             | bulk          | sigma      | 0.9945       | 0.9903       |
| SMILES             | slit pore     | sigma      | 0.9915       | 0.9918       |

Supporting Table 5: Features use in SMILES feature importance analysis. These features were generated from SMILES strings using the Mordred Python package. Details about the calculations can be found in Moriwaki et al. J. Cheminform., 2018, 10:4

| Feature                           |
|-----------------------------------|
| ABC index <sup>1</sup>            |
| number acid sites                 |
| number base sites                 |
| number of aromatic atoms          |
| number of atoms total             |
| number of heavy atoms             |
| hybridization ratio of carbons    |
| atom polarizability               |
| bond polarizability               |
| radius                            |
| topological shape index           |
| Petit Jean Index <sup>2</sup>     |
| vdW volume ABC                    |
| Vertex Adjacency Information      |
| molecular weight                  |
| Zagreb index 1 <sup>3</sup>       |
| Zagreb index 2 <sup>3</sup>       |
| number of hydrogen bond acceptors |
| number of hydrogen bond donors    |

1. Estrada, Ernesto. "Atom–bond connectivity and the energetic of branched alkanes." *Chemical Physics Letters* 463.4-6 (2008): 422-425.

2. Petitjean, Michel. "Applications of the radius-diameter diagram to the classification of topological and geometrical shapes of chemical compounds." *Journal of chemical information and computer sciences* 32.4 (1992): 331-337.

3. Pal, Anita. "The generalized Zagreb index of some carbon structures." *Acta Chemica IASI* 26.1 (2018): 91-104.

### Feature importance using random forest model

In an effort to further explore feature importance relationships a random forest model was created using the bulk IL data and the 24 features shown in Table 2 (main text). The random forest regressor was implemented in scikit learn (version 1.2.1). [Pedregosa 2011] The data was split into train and test sets using an 80/20 split. All features were scaled using the standard scaler which removes the average and sets the variance equal to 1. In the interest of simplicity, the outputs (diffusion coefficient of the anion or cation) were left unscaled. Various parameters of the random forest were tested (Table S6) and the best set of parameters were chosen using 5-fold cross-validation.

Supporting Table 6: List of features and tested values for hyperparameter optimization

| <i>Parameter name</i>                           | <i>Values</i>         |
|-------------------------------------------------|-----------------------|
| <i>Number of trees</i>                          | 25, 50, 100, 200      |
| <i>Tree max depth</i>                           | 3, 6, 9, 12           |
| <i>Minimum samples at leaf node</i>             | 2, 4, 8, 10, 12       |
| <i># of features to consider for best split</i> | 'log(2)', 'sqrt', 1.0 |

The optimal hyperparameters for the cation predictions were found to be number of trees = 200, tree max depth = 12, minimum samples at leaf node = 2, and # of features to consider for best split = 1.0. The optimal hyperparameters for the anion predictions were found to be number of trees = 25, tree max depth = 12, minimum samples at leaf node = 2, and # of features to consider for best split = 1.0. After the optimal hyperparameters were found, feature importance was computed using the Gini importance.



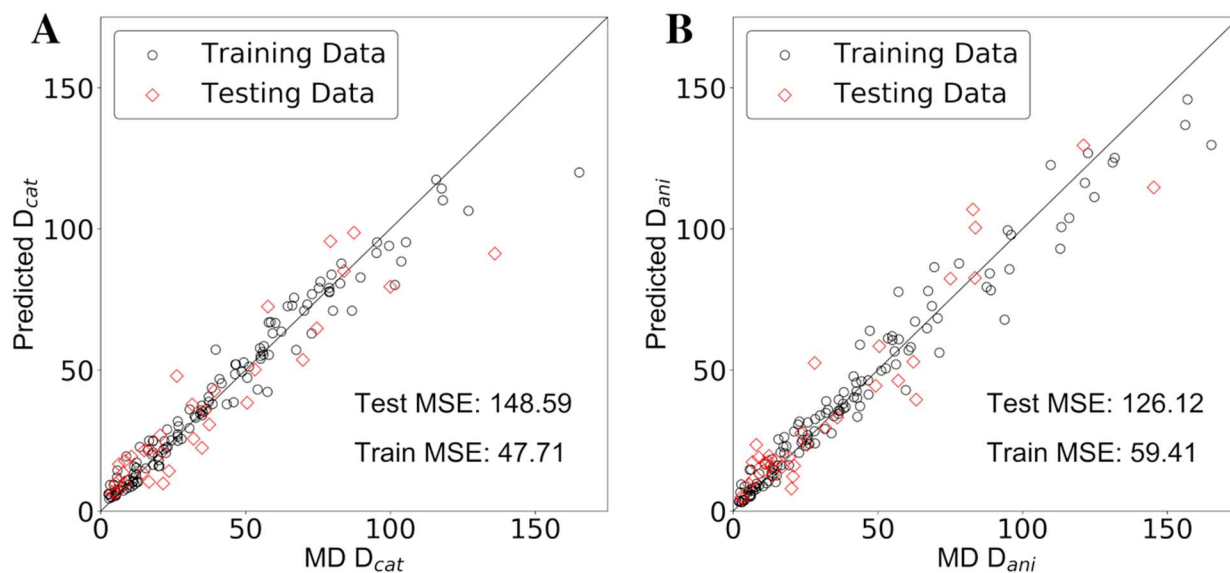

Supporting Figure 9: ML predicted and MD calculated diffusion coefficients for the (A) cation and (B) anion. Train (black squares) and test (red diamonds) sets are indicated along with the computed mean squared error (MSE).

The results for the model performance for  $D_{cat}$  and  $D_{ani}$  for train and test sets are shown in Fig. S9. The feature importance rank for  $D_{cat}$  and  $D_{ani}$  are shown in Fig. S10. We should note the mean squared error (MSE) is significantly lower for the test set versus the training set. We suspect this is due to the small sample size of the test set where outliers at the larger diffusion values can lead to large MSE values that are not compensated for by a large number of values at lower diffusion values. Visually, there does not appear to be any significant overfitting. The feature importance analysis confirms results indicated in the main text. Chemically intuitive features including temperature, density, and binary association energy were found to be important. However, since many features are likely interchangeable, including certain sets of features over others are unlikely to have a major effect on model performance. Incorporating 5-10 features seems reasonable and will likely produce similar models.

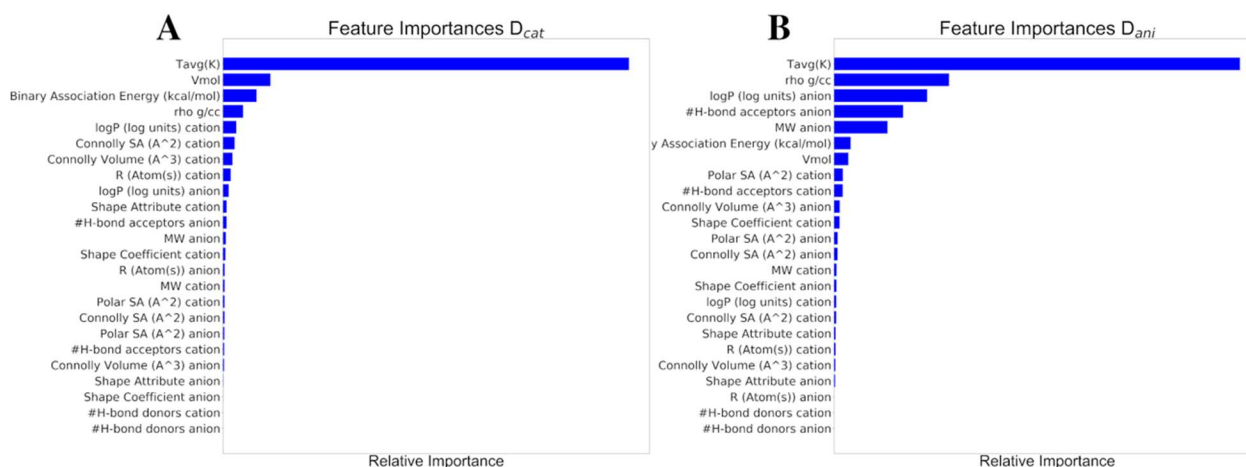

Supporting Figure 10: Feature importance calculated using Gini importance from the random forest model for the (A) cation and (B) anion.

1. Pedregosa, F.; Varoquaux, G.; Gramfort, A.; Michel, V.; Thirion, B.; Grisel, O.; Blondel, M.; Prettenhofer, P.; Weiss, R.; Dubourg, V.; Vanderplas, J.; Passos, A.; Cournapeau, D.; Brucher, M.; Perrot, M.; Duchesnay, E., Scikit-Learn: Machine Learning in Python, *Journal of Machine Learning Research* **2011**, *12*, 2825-2830

Supporting Table 7: Density and D values from MD simulations for bulk ILs

| IL | pairs | density<br>g/cc | T <sub>avg</sub><br>(K) | T <sub>+/-</sub><br>(K) | MSD cat<br>(Å <sup>2</sup> ) | MSD ani<br>(Å <sup>2</sup> ) | D <sub>cat</sub> (10 <sup>-12</sup><br>m <sup>2</sup> /s) | D <sub>cat</sub><br>+/-<br>(10 <sup>-12</sup><br>m <sup>2</sup> /s) | D <sub>ani</sub> (10 <sup>-12</sup><br>m <sup>2</sup> /s) | D <sub>ani</sub><br>+/-<br>(10 <sup>-12</sup><br>m <sup>2</sup> /s) | log<br>(slope_cat) | log<br>(slope_ani) | sigma<br>(S/m) |
|----|-------|-----------------|-------------------------|-------------------------|------------------------------|------------------------------|-----------------------------------------------------------|---------------------------------------------------------------------|-----------------------------------------------------------|---------------------------------------------------------------------|--------------------|--------------------|----------------|
| 1  | 400   | 1.672           | 349.9                   | 7.9                     | 80.7                         | 65.0                         | 29.1                                                      | 2.0                                                                 | 21.8                                                      | 1.8                                                                 | 0.93               | 0.73               | 0.498          |
| 1  | 400   | 1.640           | 379.8                   | 8.6                     | 191.6                        | 141.0                        | 77.5                                                      | 3.7                                                                 | 52.1                                                      | 6.1                                                                 | 0.91               | 0.94               | 1.143          |
| 1  | 400   | 1.610           | 409.8                   | 9.3                     | 374.8                        | 268.0                        | 150.6                                                     | 8.2                                                                 | 103.7                                                     | 3.9                                                                 | 1.01               | 0.96               | 2.042          |
| 1  | 400   | 1.578           | 439.8                   | 10.0                    | 641.4                        | 449.4                        | 266.2                                                     | 20.5                                                                | 183.8                                                     | 14.3                                                                | 1.00               | 0.91               | 3.301          |
| 1  | 400   | 1.548           | 469.8                   | 10.7                    | 994.5                        | 692.8                        | 410.2                                                     | 20.7                                                                | 283.5                                                     | 12.8                                                                | 0.98               | 0.93               | 4.672          |
| 1  | 400   | 1.518           | 499.8                   | 11.4                    | 1462.2                       | 1020.1                       | 603.2                                                     | 21.7                                                                | 416.2                                                     | 19.0                                                                | 1.02               | 0.99               | 6.328          |
| 2  | 400   | 1.591           | 349.9                   | 7.9                     | 137.8                        | 100.7                        | 52.2                                                      | 3.2                                                                 | 34.8                                                      | 3.4                                                                 | 0.88               | 0.80               | 0.778          |
| 2  | 400   | 1.559           | 379.8                   | 8.6                     | 284.7                        | 211.5                        | 112.0                                                     | 7.9                                                                 | 80.1                                                      | 5.3                                                                 | 0.97               | 0.95               | 1.551          |
| 2  | 400   | 1.530           | 409.8                   | 9.3                     | 504.4                        | 363.0                        | 205.4                                                     | 12.4                                                                | 146.7                                                     | 9.8                                                                 | 0.99               | 0.91               | 2.585          |
| 2  | 400   | 1.500           | 439.8                   | 9.9                     | 834.0                        | 592.9                        | 343.7                                                     | 25.7                                                                | 239.8                                                     | 21.4                                                                | 0.97               | 1.00               | 3.911          |
| 2  | 400   | 1.469           | 469.7                   | 10.6                    | 1245.0                       | 892.7                        | 512.6                                                     | 25.4                                                                | 368.9                                                     | 22.6                                                                | 0.97               | 0.92               | 5.420          |
| 2  | 400   | 1.439           | 499.7                   | 11.3                    | 1788.7                       | 1259.0                       | 729.4                                                     | 34.2                                                                | 512.0                                                     | 35.1                                                                | 1.04               | 0.96               | 7.028          |
| 3  | 400   | 1.592           | 349.8                   | 7.9                     | 103.2                        | 80.7                         | 37.8                                                      | 5.2                                                                 | 28.1                                                      | 3.0                                                                 | 0.84               | 0.75               | 0.589          |
| 3  | 400   | 1.560           | 379.8                   | 8.6                     | 242.6                        | 183.6                        | 96.6                                                      | 5.7                                                                 | 70.0                                                      | 8.2                                                                 | 0.91               | 0.91               | 1.345          |
| 3  | 400   | 1.529           | 409.8                   | 9.3                     | 451.9                        | 342.2                        | 181.1                                                     | 8.7                                                                 | 132.8                                                     | 8.8                                                                 | 0.96               | 1.00               | 2.302          |
| 3  | 400   | 1.499           | 439.8                   | 9.9                     | 783.2                        | 582.7                        | 323.9                                                     | 21.0                                                                | 236.2                                                     | 21.6                                                                | 0.94               | 0.92               | 3.752          |
| 3  | 400   | 1.469           | 469.8                   | 10.6                    | 1172.9                       | 879.5                        | 487.2                                                     | 38.5                                                                | 364.3                                                     | 36.8                                                                | 0.91               | 0.93               | 5.233          |
| 3  | 400   | 1.438           | 499.8                   | 11.3                    | 1719.6                       | 1288.5                       | 702.4                                                     | 30.2                                                                | 527.7                                                     | 33.8                                                                | 1.00               | 1.02               | 6.959          |
| 4  | 400   | 1.469           | 349.9                   | 7.8                     | 253.0                        | 157.3                        | 98.7                                                      | 8.6                                                                 | 59.5                                                      | 8.1                                                                 | 0.97               | 0.91               | 1.306          |
| 4  | 400   | 1.439           | 379.8                   | 8.5                     | 489.0                        | 292.3                        | 199.8                                                     | 13.0                                                                | 115.5                                                     | 11.3                                                                | 0.92               | 0.87               | 2.349          |
| 4  | 400   | 1.410           | 409.8                   | 9.2                     | 800.4                        | 485.2                        | 320.4                                                     | 12.3                                                                | 193.9                                                     | 8.5                                                                 | 1.04               | 0.96               | 3.477          |
| 4  | 400   | 1.381           | 439.8                   | 9.9                     | 1238.2                       | 781.6                        | 505.6                                                     | 17.8                                                                | 317.9                                                     | 14.9                                                                | 0.94               | 1.03               | 5.081          |
| 4  | 400   | 1.353           | 469.8                   | 10.5                    | 1776.9                       | 1136.9                       | 728.3                                                     | 33.7                                                                | 467.8                                                     | 29.2                                                                | 1.04               | 0.98               | 6.771          |
| 4  | 400   | 1.325           | 499.8                   | 11.2                    | 2436.2                       | 1530.9                       | 999.7                                                     | 53.6                                                                | 622.6                                                     | 46.3                                                                | 1.05               | 1.00               | 8.452          |
| 5  | 400   | 1.527           | 349.9                   | 7.9                     | 135.5                        | 99.6                         | 49.9                                                      | 2.8                                                                 | 35.5                                                      | 2.5                                                                 | 0.86               | 0.78               | 0.706          |
| 5  | 400   | 1.496           | 379.9                   | 8.5                     | 295.4                        | 211.7                        | 115.2                                                     | 6.4                                                                 | 81.0                                                      | 4.5                                                                 | 0.95               | 0.87               | 1.462          |
| 5  | 400   | 1.467           | 409.8                   | 9.2                     | 552.0                        | 386.1                        | 224.7                                                     | 11.2                                                                | 150.8                                                     | 9.2                                                                 | 1.02               | 0.97               | 2.544          |
| 5  | 400   | 1.438           | 439.8                   | 9.9                     | 889.9                        | 632.1                        | 366.0                                                     | 13.8                                                                | 259.0                                                     | 21.5                                                                | 1.04               | 0.97               | 3.867          |
| 5  | 400   | 1.409           | 469.8                   | 10.5                    | 1332.1                       | 948.2                        | 552.2                                                     | 31.1                                                                | 382.2                                                     | 14.7                                                                | 0.99               | 0.99               | 5.304          |
| 5  | 400   | 1.378           | 499.8                   | 11.2                    | 1895.3                       | 1362.5                       | 789.9                                                     | 29.6                                                                | 562.7                                                     | 29.8                                                                | 0.99               | 0.95               | 7.060          |
| 6  | 400   | 1.477           | 349.8                   | 7.8                     | 133.1                        | 89.2                         | 48.7                                                      | 2.0                                                                 | 30.9                                                      | 1.8                                                                 | 0.97               | 0.89               | 0.613          |
| 6  | 400   | 1.447           | 379.8                   | 8.5                     | 295.4                        | 200.0                        | 115.5                                                     | 11.2                                                                | 75.9                                                      | 6.8                                                                 | 1.01               | 1.00               | 1.331          |
| 6  | 400   | 1.419           | 409.8                   | 9.2                     | 532.5                        | 358.7                        | 217.6                                                     | 13.4                                                                | 142.7                                                     | 7.3                                                                 | 0.96               | 0.90               | 2.276          |
| 6  | 400   | 1.389           | 439.8                   | 9.8                     | 863.7                        | 600.1                        | 349.7                                                     | 19.7                                                                | 239.3                                                     | 17.6                                                                | 1.00               | 1.02               | 3.394          |
| 6  | 400   | 1.359           | 469.8                   | 10.5                    | 1350.2                       | 942.6                        | 563.4                                                     | 24.7                                                                | 382.5                                                     | 30.7                                                                | 0.96               | 1.01               | 4.994          |
| 6  | 400   | 1.332           | 499.8                   | 11.2                    | 1906.4                       | 1338.2                       | 789.3                                                     | 27.7                                                                | 550.4                                                     | 40.7                                                                | 0.98               | 0.99               | 6.514          |
| 7  | 400   | 1.432           | 349.8                   | 7.8                     | 150.9                        | 111.8                        | 54.9                                                      | 4.0                                                                 | 39.6                                                      | 2.9                                                                 | 0.83               | 0.79               | 0.682          |
| 7  | 400   | 1.402           | 379.8                   | 8.5                     | 310.8                        | 236.2                        | 122.2                                                     | 8.3                                                                 | 90.1                                                      | 7.2                                                                 | 0.97               | 0.92               | 1.381          |
| 7  | 400   | 1.373           | 409.8                   | 9.1                     | 563.0                        | 423.3                        | 225.7                                                     | 15.0                                                                | 167.2                                                     | 10.5                                                                | 0.97               | 0.98               | 2.320          |

|    |     |       |       |      |        |        |        |      |       |      |      |      |        |
|----|-----|-------|-------|------|--------|--------|--------|------|-------|------|------|------|--------|
| 7  | 400 | 1.345 | 439.8 | 9.8  | 912.1  | 690.0  | 372.9  | 20.1 | 281.4 | 22.7 | 0.99 | 0.97 | 3.526  |
| 7  | 400 | 1.316 | 469.8 | 10.4 | 1365.7 | 1036.5 | 559.4  | 22.0 | 417.1 | 11.8 | 1.02 | 1.02 | 4.821  |
| 7  | 400 | 1.287 | 499.8 | 11.1 | 1932.1 | 1500.9 | 788.9  | 47.4 | 614.0 | 38.3 | 1.01 | 0.99 | 6.368  |
| 8  | 400 | 1.430 | 349.9 | 7.8  | 142.8  | 97.9   | 52.3   | 4.5  | 34.4  | 2.2  | 0.88 | 0.87 | 0.624  |
| 8  | 400 | 1.401 | 379.8 | 8.4  | 292.2  | 207.1  | 113.6  | 8.8  | 79.4  | 6.9  | 0.90 | 0.86 | 1.255  |
| 8  | 400 | 1.372 | 409.8 | 9.1  | 556.9  | 387.1  | 220.3  | 13.1 | 153.1 | 10.5 | 0.97 | 0.99 | 2.203  |
| 8  | 400 | 1.344 | 439.8 | 9.8  | 913.8  | 644.8  | 373.2  | 20.3 | 257.9 | 22.8 | 0.93 | 0.97 | 3.397  |
| 8  | 400 | 1.314 | 469.8 | 10.5 | 1378.5 | 1050.2 | 561.8  | 26.6 | 428.5 | 17.6 | 0.95 | 1.01 | 4.883  |
| 8  | 400 | 1.286 | 499.8 | 11.1 | 1994.2 | 1475.8 | 826.7  | 33.7 | 606.3 | 31.7 | 0.99 | 1.01 | 6.497  |
| 9  | 400 | 1.430 | 349.9 | 7.8  | 110.8  | 79.6   | 39.2   | 3.9  | 27.4  | 2.7  | 0.78 | 0.66 | 0.479  |
| 9  | 400 | 1.402 | 379.8 | 8.5  | 234.4  | 176.4  | 89.9   | 7.0  | 66.1  | 6.3  | 0.90 | 0.84 | 1.015  |
| 9  | 400 | 1.373 | 409.8 | 9.1  | 457.0  | 341.8  | 180.3  | 8.1  | 135.1 | 8.3  | 0.98 | 0.95 | 1.861  |
| 9  | 400 | 1.345 | 439.8 | 9.8  | 779.1  | 582.3  | 316.3  | 17.2 | 234.8 | 11.0 | 0.95 | 0.99 | 2.970  |
| 9  | 400 | 1.317 | 469.8 | 10.4 | 1202.1 | 929.0  | 493.8  | 22.1 | 379.9 | 23.2 | 0.98 | 0.96 | 4.317  |
| 9  | 400 | 1.289 | 499.8 | 11.1 | 1755.9 | 1335.0 | 713.5  | 43.4 | 549.4 | 23.7 | 1.05 | 1.02 | 5.738  |
| 10 | 400 | 1.396 | 349.9 | 7.7  | 88.4   | 65.4   | 28.9   | 2.5  | 21.4  | 2.1  | 0.72 | 0.67 | 0.342  |
| 10 | 400 | 1.369 | 379.8 | 8.4  | 205.0  | 150.1  | 77.7   | 5.8  | 55.3  | 6.2  | 0.93 | 0.88 | 0.817  |
| 10 | 400 | 1.339 | 409.8 | 9.1  | 417.2  | 306.8  | 167.7  | 13.0 | 122.4 | 7.8  | 0.89 | 0.90 | 1.615  |
| 10 | 400 | 1.311 | 439.8 | 9.7  | 749.2  | 550.3  | 307.3  | 18.0 | 224.4 | 18.4 | 1.01 | 0.99 | 2.699  |
| 10 | 400 | 1.284 | 469.8 | 10.4 | 1130.9 | 888.9  | 467.2  | 21.5 | 364.6 | 30.9 | 0.99 | 0.96 | 3.872  |
| 10 | 400 | 1.256 | 499.8 | 11.1 | 1618.4 | 1299.0 | 667.6  | 30.8 | 534.9 | 33.1 | 0.93 | 1.03 | 5.148  |
| 11 | 400 | 1.423 | 349.8 | 7.8  | 280.3  | 163.9  | 109.0  | 6.8  | 61.6  | 3.3  | 0.97 | 0.90 | 1.223  |
| 11 | 400 | 1.393 | 379.8 | 8.4  | 502.5  | 309.2  | 203.0  | 12.0 | 122.1 | 7.2  | 0.96 | 0.98 | 2.101  |
| 11 | 400 | 1.364 | 409.8 | 9.1  | 856.3  | 526.5  | 349.5  | 15.9 | 210.8 | 12.3 | 0.95 | 0.89 | 3.285  |
| 11 | 400 | 1.335 | 439.8 | 9.8  | 1312.2 | 834.5  | 541.7  | 40.3 | 339.9 | 26.0 | 1.01 | 1.01 | 4.716  |
| 11 | 400 | 1.306 | 469.8 | 10.5 | 1823.8 | 1209.0 | 746.4  | 36.0 | 492.4 | 22.7 | 1.00 | 0.97 | 6.067  |
| 11 | 400 | 1.277 | 499.8 | 11.1 | 2527.7 | 1721.6 | 1037.9 | 62.1 | 706.8 | 34.6 | 1.00 | 1.03 | 7.856  |
| 12 | 400 | 1.298 | 349.8 | 7.6  | 161.2  | 109.5  | 59.3   | 2.6  | 38.4  | 2.3  | 0.81 | 0.81 | 0.561  |
| 12 | 400 | 1.270 | 379.9 | 8.3  | 320.1  | 234.5  | 122.9  | 7.5  | 90.1  | 7.9  | 0.85 | 0.86 | 1.103  |
| 12 | 400 | 1.245 | 409.8 | 8.9  | 539.9  | 422.9  | 211.4  | 14.6 | 170.2 | 8.9  | 0.97 | 0.93 | 1.794  |
| 12 | 400 | 1.215 | 439.8 | 9.5  | 892.9  | 708.7  | 352.5  | 26.2 | 283.0 | 11.0 | 0.99 | 1.00 | 2.719  |
| 12 | 400 | 1.190 | 469.8 | 10.2 | 1354.9 | 1092.6 | 550.0  | 33.6 | 443.5 | 23.6 | 1.01 | 0.99 | 3.898  |
| 12 | 400 | 1.163 | 499.8 | 10.9 | 1837.7 | 1629.6 | 753.1  | 37.8 | 670.0 | 46.6 | 0.93 | 0.97 | 5.126  |
| 13 | 400 | 1.358 | 349.8 | 7.9  | 236.0  | 148.0  | 88.7   | 4.8  | 57.5  | 6.7  | 0.95 | 0.96 | 1.586  |
| 13 | 400 | 1.326 | 379.8 | 8.6  | 501.1  | 338.6  | 197.8  | 7.8  | 134.8 | 5.7  | 0.99 | 1.04 | 3.246  |
| 13 | 400 | 1.297 | 409.8 | 9.3  | 852.7  | 632.0  | 347.2  | 22.9 | 263.8 | 17.5 | 0.96 | 0.97 | 5.403  |
| 13 | 400 | 1.265 | 439.8 | 10.0 | 1408.6 | 1044.6 | 580.4  | 41.2 | 429.4 | 34.1 | 1.00 | 1.04 | 8.120  |
| 13 | 400 | 1.237 | 469.8 | 10.6 | 2050.3 | 1558.9 | 840.0  | 44.5 | 632.6 | 23.2 | 1.06 | 1.08 | 10.839 |
| 13 | 400 | 1.209 | 499.8 | 11.3 | 2809.0 | 2246.1 | 1177.1 | 67.6 | 938.1 | 32.8 | 0.97 | 1.03 | 14.298 |
| 14 | 250 | 1.284 | 329.9 | 7.6  | 93.2   | 53.6   | 34.0   | 4.7  | 19.8  | 2.4  | 0.74 | 0.69 | 0.527  |
| 14 | 250 | 1.258 | 359.8 | 8.3  | 210.9  | 148.5  | 78.5   | 4.7  | 58.3  | 5.5  | 0.85 | 0.97 | 1.205  |
| 14 | 250 | 1.229 | 389.8 | 9.0  | 455.4  | 331.1  | 175.9  | 10.2 | 135.0 | 15.5 | 0.98 | 0.94 | 2.469  |
| 14 | 250 | 1.201 | 419.8 | 9.7  | 427.6  | 319.2  | 327.7  | 29.3 | 250.1 | 26.0 | 0.91 | 0.89 | 4.165  |

|    |     |       |       |      |        |        |        |       |        |        |      |      |        |
|----|-----|-------|-------|------|--------|--------|--------|-------|--------|--------|------|------|--------|
| 14 | 250 | 1.175 | 449.8 | 10.4 | 641.7  | 531.1  | 506.2  | 26.5  | 438.4  | 18.5   | 0.88 | 1.00 | 6.216  |
| 15 | 192 | 1.081 | 409.8 | 9.3  | 132.4  | 106.6  | 44.7   | 3.3   | 39.5   | 4.1    | 0.61 | 0.94 | 0.432  |
| 15 | 192 | 1.058 | 439.9 | 10.0 | 238.4  | 225.0  | 83.8   | 11.0  | 88.6   | 9.5    | 0.79 | 1.02 | 0.806  |
| 15 | 192 | 1.034 | 469.8 | 10.7 | 232.6  | 221.0  | 163.5  | 13.3  | 176.7  | 23.2   | 0.74 | 0.90 | 1.455  |
| 15 | 192 | 1.013 | 499.8 | 11.4 | 366.7  | 395.7  | 265.7  | 39.7  | 320.3  | 18.8   | 0.79 | 0.95 | 2.308  |
| 16 | 192 | 1.052 | 409.8 | 9.3  | 106.2  | 76.1   | 32.4   | 4.5   | 27.9   | 4.3    | 0.65 | 0.83 | 0.280  |
| 16 | 192 | 1.029 | 439.8 | 10.0 | 177.6  | 150.5  | 57.7   | 7.2   | 57.0   | 6.8    | 0.71 | 0.89 | 0.485  |
| 16 | 192 | 1.007 | 469.8 | 10.6 | 299.4  | 307.4  | 105.9  | 10.7  | 124.2  | 11.7   | 0.75 | 0.85 | 0.890  |
| 16 | 192 | 0.987 | 499.8 | 11.3 | 266.9  | 280.9  | 181.8  | 27.6  | 229.0  | 41.5   | 0.73 | 0.86 | 1.465  |
| 17 | 192 | 1.005 | 439.8 | 9.9  | 173.6  | 162.0  | 56.2   | 7.5   | 61.8   | 10.2   | 0.53 | 0.89 | 0.455  |
| 17 | 192 | 0.981 | 469.8 | 10.6 | 264.2  | 281.4  | 88.1   | 12.7  | 110.2  | 10.6   | 0.63 | 0.78 | 0.699  |
| 17 | 192 | 0.962 | 499.8 | 11.2 | 453.5  | 518.2  | 166.9  | 24.7  | 210.6  | 20.9   | 0.79 | 0.94 | 1.226  |
| 18 | 300 | 0.920 | 349.8 | 7.8  | 170.3  | 200.9  | 61.4   | 6.0   | 79.9   | 5.8    | 0.84 | 0.95 | 1.093  |
| 18 | 300 | 0.901 | 379.8 | 8.5  | 321.8  | 436.1  | 123.2  | 10.3  | 176.8  | 10.5   | 0.95 | 1.04 | 2.094  |
| 18 | 300 | 0.883 | 409.8 | 9.2  | 570.4  | 786.2  | 229.5  | 21.5  | 321.5  | 27.0   | 0.89 | 1.01 | 3.493  |
| 18 | 300 | 0.865 | 439.8 | 9.9  | 480.8  | 688.1  | 383.7  | 28.3  | 571.3  | 40.1   | 0.98 | 0.98 | 5.524  |
| 18 | 300 | 0.846 | 469.8 | 10.5 | 719.8  | 1006.1 | 577.3  | 34.2  | 828.8  | 83.2   | 0.95 | 0.94 | 7.450  |
| 18 | 300 | 0.829 | 499.8 | 11.2 | 974.4  | 1438.7 | 793.0  | 55.9  | 1210.9 | 94.2   | 0.97 | 0.99 | 9.778  |
| 19 | 300 | 0.980 | 349.8 | 7.9  | 254.9  | 316.5  | 97.8   | 7.0   | 128.0  | 9.7    | 0.88 | 0.95 | 1.958  |
| 19 | 300 | 0.960 | 379.8 | 8.6  | 449.6  | 620.0  | 180.5  | 11.0  | 254.1  | 21.1   | 0.94 | 1.09 | 3.401  |
| 19 | 300 | 0.940 | 409.8 | 9.3  | 757.8  | 1025.4 | 306.0  | 17.6  | 426.8  | 22.9   | 0.92 | 0.97 | 5.206  |
| 19 | 300 | 0.921 | 439.8 | 9.9  | 574.2  | 827.7  | 463.9  | 32.1  | 686.9  | 39.6   | 0.96 | 1.00 | 7.460  |
| 19 | 300 | 0.903 | 469.8 | 10.6 | 819.3  | 1168.8 | 661.2  | 55.7  | 960.6  | 65.9   | 0.93 | 1.00 | 9.647  |
| 19 | 300 | 0.884 | 499.7 | 11.3 | 1131.0 | 1583.1 | 954.0  | 77.0  | 1318.5 | 96.6   | 1.00 | 1.00 | 12.449 |
| 20 | 300 | 1.240 | 349.8 | 7.8  | 221.7  | 272.0  | 82.9   | 2.7   | 110.2  | 9.1    | 0.88 | 0.98 | 1.427  |
| 20 | 300 | 1.215 | 379.8 | 8.5  | 401.2  | 549.8  | 156.0  | 11.9  | 228.1  | 17.3   | 0.95 | 0.97 | 2.563  |
| 20 | 300 | 1.191 | 409.8 | 9.2  | 672.8  | 941.4  | 265.9  | 13.0  | 388.6  | 26.1   | 0.93 | 1.02 | 3.965  |
| 20 | 300 | 1.166 | 439.8 | 9.8  | 527.4  | 764.8  | 417.5  | 22.5  | 628.7  | 38.0   | 0.92 | 1.03 | 5.784  |
| 20 | 300 | 1.142 | 469.8 | 10.5 | 780.0  | 1068.9 | 623.9  | 56.68 | 886.8  | 36.50  | 0.97 | 0.97 | 7.655  |
| 20 | 300 | 1.118 | 499.8 | 11.2 | 1020.6 | 1488.5 | 830.9  | 80.41 | 1215.6 | 84.82  | 0.98 | 0.97 | 9.547  |
| 21 | 300 | 1.087 | 349.8 | 8.1  | 291.2  | 255.3  | 117.3  | 7.74  | 103.3  | 5.57   | 0.84 | 0.96 | 2.739  |
| 21 | 300 | 1.067 | 379.8 | 8.8  | 578.9  | 505.8  | 235.7  | 15.34 | 206.9  | 13.96  | 0.97 | 1.01 | 4.967  |
| 21 | 300 | 1.046 | 409.8 | 9.5  | 956.1  | 847.9  | 386.2  | 32.03 | 348.1  | 19.59  | 1.07 | 0.96 | 7.491  |
| 21 | 300 | 1.027 | 439.8 | 10.2 | 727.0  | 677.5  | 593.4  | 43.24 | 558.2  | 46.19  | 0.99 | 1.00 | 10.739 |
| 21 | 300 | 1.007 | 469.8 | 10.9 | 1055.7 | 991.6  | 874.2  | 76.23 | 835.9  | 57.80  | 1.01 | 1.01 | 14.647 |
| 21 | 300 | 0.988 | 499.7 | 11.6 | 1396.0 | 1333.5 | 1158.3 | 73.94 | 1130.5 | 114.47 | 0.99 | 1.01 | 18.077 |
| 22 | 300 | 1.037 | 349.8 | 8.0  | 175.9  | 150.1  | 64.4   | 3.30  | 58.6   | 5.57   | 0.84 | 0.92 | 1.260  |
| 22 | 300 | 1.018 | 379.8 | 8.7  | 370.6  | 336.1  | 146.5  | 11.51 | 137.9  | 13.76  | 0.94 | 1.02 | 2.632  |
| 22 | 300 | 0.998 | 409.8 | 9.3  | 669.0  | 630.0  | 268.9  | 20.42 | 258.2  | 15.10  | 0.99 | 0.97 | 4.432  |
| 22 | 300 | 0.978 | 439.8 | 10.0 | 563.1  | 530.6  | 464.8  | 34.93 | 438.2  | 23.41  | 1.00 | 0.99 | 6.939  |
| 22 | 300 | 0.959 | 469.8 | 10.7 | 801.2  | 814.6  | 645.6  | 40.05 | 673.9  | 45.66  | 0.96 | 1.02 | 9.308  |
| 22 | 300 | 0.940 | 499.7 | 11.4 | 1158.8 | 1159.9 | 952.2  | 85.65 | 949.0  | 57.11  | 1.05 | 1.00 | 12.352 |
| 23 | 300 | 1.032 | 349.8 | 7.9  | 75.5   | 64.1   | 26.7   | 2.76  | 24.6   | 2.34   | 0.75 | 0.80 | 0.515  |

|    |     |       |       |      |        |        |        |        |        |        |      |      |        |
|----|-----|-------|-------|------|--------|--------|--------|--------|--------|--------|------|------|--------|
| 23 | 300 | 1.013 | 379.8 | 8.6  | 173.4  | 169.0  | 63.1   | 4.59   | 67.0   | 3.87   | 0.89 | 0.92 | 1.181  |
| 23 | 300 | 0.993 | 409.8 | 9.3  | 347.0  | 382.4  | 135.2  | 12.61  | 156.3  | 8.65   | 0.90 | 1.03 | 2.405  |
| 23 | 300 | 0.975 | 439.8 | 9.9  | 323.2  | 348.5  | 262.8  | 15.15  | 282.0  | 23.76  | 0.95 | 0.97 | 4.112  |
| 23 | 300 | 0.958 | 469.8 | 10.6 | 499.3  | 571.2  | 397.0  | 15.59  | 472.4  | 41.04  | 0.96 | 0.97 | 6.034  |
| 23 | 300 | 0.940 | 499.8 | 11.3 | 725.0  | 856.0  | 587.0  | 37.37  | 695.2  | 50.90  | 0.99 | 0.99 | 8.211  |
| 24 | 300 | 0.908 | 349.8 | 7.8  | 289.9  | 430.8  | 112.6  | 7.74   | 173.8  | 10.66  | 0.98 | 0.99 | 1.998  |
| 24 | 300 | 0.889 | 379.8 | 8.5  | 505.5  | 785.4  | 200.2  | 16.42  | 317.3  | 21.81  | 0.96 | 0.95 | 3.255  |
| 24 | 300 | 0.870 | 409.8 | 9.2  | 862.6  | 1382.0 | 350.8  | 27.06  | 572.3  | 22.49  | 0.96 | 0.95 | 5.268  |
| 24 | 300 | 0.851 | 439.8 | 9.8  | 659.7  | 1030.0 | 532.4  | 36.95  | 837.2  | 51.79  | 0.95 | 0.97 | 7.128  |
| 24 | 300 | 0.833 | 469.8 | 10.5 | 920.1  | 1446.5 | 758.7  | 50.95  | 1226.1 | 88.31  | 0.95 | 1.02 | 9.463  |
| 24 | 300 | 0.816 | 499.8 | 11.2 | 1212.6 | 1923.2 | 995.7  | 111.22 | 1570.2 | 129.41 | 0.95 | 0.97 | 11.256 |
| 25 | 300 | 0.959 | 349.8 | 7.9  | 419.7  | 621.1  | 166.8  | 14.02  | 255.8  | 25.98  | 0.93 | 0.96 | 3.261  |
| 25 | 300 | 0.939 | 379.8 | 8.5  | 698.0  | 1036.0 | 279.0  | 21.54  | 425.5  | 32.22  | 0.92 | 0.96 | 4.902  |
| 25 | 300 | 0.919 | 409.8 | 9.2  | 1109.5 | 1712.7 | 458.9  | 24.62  | 712.8  | 47.59  | 0.97 | 1.05 | 7.394  |
| 25 | 300 | 0.899 | 439.8 | 9.9  | 825.5  | 1168.5 | 674.9  | 37.61  | 954.9  | 86.35  | 0.98 | 0.99 | 9.381  |
| 25 | 300 | 0.881 | 469.8 | 10.6 | 1094.6 | 1592.8 | 896.9  | 55.16  | 1311.5 | 111.44 | 0.99 | 0.96 | 11.658 |
| 25 | 300 | 0.861 | 499.8 | 11.2 | 1515.8 | 2173.7 | 1269.7 | 65.91  | 1791.6 | 75.99  | 1.02 | 0.98 | 14.854 |
| 26 | 300 | 1.198 | 349.8 | 7.8  | 332.4  | 481.9  | 124.2  | 8.47   | 192.8  | 13.84  | 0.96 | 0.94 | 2.121  |
| 26 | 300 | 1.172 | 379.9 | 8.5  | 572.5  | 883.6  | 231.2  | 15.79  | 364.0  | 25.76  | 0.85 | 1.01 | 3.588  |
| 26 | 300 | 1.148 | 409.8 | 9.1  | 899.1  | 1377.8 | 360.0  | 40.90  | 570.5  | 41.19  | 0.88 | 0.96 | 5.092  |
| 26 | 300 | 1.123 | 439.8 | 9.8  | 702.0  | 1068.1 | 552.1  | 50.05  | 876.1  | 84.55  | 0.90 | 0.94 | 7.126  |
| 26 | 300 | 1.100 | 469.8 | 10.5 | 986.5  | 1501.1 | 801.9  | 60.59  | 1248.4 | 73.86  | 1.00 | 1.01 | 9.377  |
| 26 | 300 | 1.076 | 499.8 | 11.1 | 1309.3 | 1921.8 | 1054.0 | 70.74  | 1562.4 | 97.22  | 0.99 | 0.94 | 11.004 |
| 27 | 300 | 1.046 | 349.8 | 8.0  | 531.8  | 494.7  | 215.5  | 12.80  | 201.5  | 14.30  | 1.00 | 0.98 | 4.414  |
| 27 | 300 | 1.024 | 379.9 | 8.7  | 918.8  | 890.3  | 374.8  | 23.13  | 360.0  | 22.83  | 0.99 | 1.05 | 7.011  |
| 27 | 300 | 1.004 | 409.8 | 9.4  | 1417.4 | 1449.1 | 575.8  | 35.46  | 596.6  | 42.40  | 0.98 | 0.96 | 10.165 |
| 27 | 300 | 0.984 | 439.8 | 10.1 | 1070.5 | 1076.8 | 867.4  | 80.48  | 890.6  | 61.13  | 0.92 | 0.98 | 13.925 |
| 27 | 300 | 0.965 | 469.8 | 10.8 | 1452.4 | 1422.3 | 1181.2 | 67.11  | 1161.5 | 62.80  | 0.99 | 0.98 | 17.029 |
| 27 | 300 | 0.945 | 499.8 | 11.5 | 1958.7 | 1994.5 | 1652.2 | 90.02  | 1652.6 | 93.12  | 1.03 | 1.01 | 22.112 |
| 28 | 300 | 1.009 | 349.9 | 7.9  | 336.1  | 361.2  | 128.9  | 12.84  | 146.9  | 10.40  | 0.97 | 0.99 | 2.473  |
| 28 | 300 | 0.989 | 379.8 | 8.6  | 659.6  | 723.7  | 266.0  | 16.62  | 300.4  | 27.93  | 0.94 | 0.99 | 4.582  |
| 28 | 300 | 0.968 | 409.8 | 9.3  | 1058.5 | 1142.9 | 435.3  | 20.05  | 466.6  | 29.72  | 0.92 | 0.95 | 6.625  |
| 28 | 300 | 0.949 | 439.8 | 10.0 | 852.3  | 910.2  | 698.0  | 42.03  | 751.0  | 52.11  | 0.97 | 1.01 | 9.721  |
| 28 | 300 | 0.929 | 469.7 | 10.6 | 1229.1 | 1348.7 | 1015.6 | 59.15  | 1134.5 | 99.52  | 1.01 | 1.01 | 13.217 |
| 28 | 300 | 0.910 | 499.7 | 11.3 | 1635.9 | 1748.4 | 1360.8 | 119.66 | 1453.7 | 88.04  | 1.00 | 1.00 | 15.932 |
| 29 | 300 | 1.007 | 349.9 | 7.9  | 141.8  | 175.7  | 52.1   | 2.14   | 67.9   | 7.27   | 0.81 | 0.88 | 1.060  |
| 29 | 300 | 0.987 | 379.8 | 8.5  | 318.0  | 403.1  | 123.7  | 6.50   | 163.8  | 15.01  | 0.96 | 0.90 | 2.293  |
| 29 | 300 | 0.967 | 409.8 | 9.2  | 604.5  | 791.9  | 244.7  | 20.35  | 328.1  | 25.41  | 0.96 | 0.99 | 4.148  |
| 29 | 300 | 0.949 | 439.8 | 9.9  | 487.9  | 616.2  | 392.0  | 26.95  | 505.0  | 39.32  | 0.96 | 0.98 | 5.942  |
| 29 | 300 | 0.931 | 469.8 | 10.6 | 723.8  | 951.1  | 580.2  | 59.24  | 780.8  | 75.61  | 0.97 | 1.03 | 8.272  |
| 29 | 300 | 0.912 | 499.8 | 11.2 | 988.0  | 1319.7 | 796.8  | 69.20  | 1097.5 | 44.47  | 0.99 | 1.02 | 10.611 |

Supporting Table 8: Density and D values for ILs confined in slit pores. The height of the slit pore is given by H in angstroms

| IL | pairs | H (Å) | density g/cc | T <sub>avg</sub> (K) | T <sub>+/-</sub> (K) | MSD cat (Å <sup>2</sup> ) | MSD ani (Å <sup>2</sup> ) | D <sub>cat</sub> (10 <sup>-12</sup> m <sup>2</sup> /s) | D <sub>cat</sub> +/- (10 <sup>-12</sup> m <sup>2</sup> /s) | D <sub>ani</sub> (10 <sup>-12</sup> m <sup>2</sup> /s) | D <sub>ani</sub> i+/- (10 <sup>-12</sup> m <sup>2</sup> /s) | log (slope_cat) | log (slope_ani) |
|----|-------|-------|--------------|----------------------|----------------------|---------------------------|---------------------------|--------------------------------------------------------|------------------------------------------------------------|--------------------------------------------------------|-------------------------------------------------------------|-----------------|-----------------|
| 1  | 179   | 25.2  | 1.642        | 349.9                | 3.7                  | 25.7                      | 19.1                      | 12.1                                                   | 1.8                                                        | 8.6                                                    | 1.1                                                         | 0.682           | 0.551           |
| 1  | 179   | 25.6  | 1.617        | 379.8                | 4.1                  | 49.7                      | 33.7                      | 26.6                                                   | 4.2                                                        | 16.3                                                   | 3.5                                                         | 0.794           | 0.647           |
| 1  | 179   | 26.2  | 1.579        | 409.8                | 4.4                  | 132.7                     | 90.2                      | 78.4                                                   | 4.8                                                        | 50.2                                                   | 7.1                                                         | 1.026           | 0.959           |
| 1  | 179   | 27.0  | 1.532        | 439.7                | 4.7                  | 156.3                     | 105.5                     | 190.8                                                  | 22.0                                                       | 117.0                                                  | 14.4                                                        | 0.962           | 0.826           |
| 1  | 179   | 27.4  | 1.514        | 469.7                | 5.0                  | 253.3                     | 163.1                     | 312.8                                                  | 25.1                                                       | 187.7                                                  | 24.1                                                        | 1.014           | 0.918           |
| 1  | 179   | 28.0  | 1.477        | 499.7                | 5.3                  | 397.8                     | 243.4                     | 504.5                                                  | 46.0                                                       | 294.0                                                  | 31.7                                                        | 1.033           | 0.940           |
| 1  | 287   | 40.1  | 1.658        | 349.8                | 4.5                  | 34.3                      | 26.2                      | 17.4                                                   | 3.7                                                        | 12.2                                                   | 2.3                                                         | 0.664           | 0.596           |
| 1  | 287   | 40.8  | 1.629        | 379.9                | 4.9                  | 85.3                      | 61.9                      | 48.0                                                   | 5.4                                                        | 32.4                                                   | 4.8                                                         | 1.001           | 0.789           |
| 1  | 287   | 41.8  | 1.588        | 409.8                | 5.3                  | 188.4                     | 133.1                     | 112.1                                                  | 10.5                                                       | 77.8                                                   | 9.3                                                         | 1.002           | 0.867           |
| 1  | 287   | 43.1  | 1.541        | 439.7                | 5.7                  | 205.8                     | 141.8                     | 245.8                                                  | 20.3                                                       | 162.2                                                  | 21.5                                                        | 0.984           | 0.877           |
| 1  | 287   | 43.2  | 1.536        | 469.8                | 6.1                  | 289.7                     | 194.1                     | 345.8                                                  | 35.9                                                       | 223.9                                                  | 19.7                                                        | 0.898           | 0.851           |
| 1  | 287   | 44.6  | 1.488        | 499.7                | 6.5                  | 477.1                     | 318.9                     | 600.0                                                  | 88.0                                                       | 389.8                                                  | 66.8                                                        | 1.032           | 0.982           |
| 1  | 395   | 55.5  | 1.647        | 349.8                | 5.0                  | 51.6                      | 39.8                      | 28.1                                                   | 4.3                                                        | 19.5                                                   | 4.1                                                         | 0.939           | 0.758           |
| 1  | 395   | 56.8  | 1.608        | 379.8                | 5.5                  | 134.2                     | 102.2                     | 80.3                                                   | 17.1                                                       | 59.7                                                   | 17.8                                                        | 0.684           | 0.585           |
| 1  | 395   | 58.2  | 1.571        | 409.8                | 5.9                  | 289.5                     | 204.3                     | 176.7                                                  | 27.5                                                       | 122.4                                                  | 34.5                                                        | 0.965           | 0.881           |
| 1  | 395   | 59.1  | 1.546        | 439.8                | 6.3                  | 232.9                     | 165.6                     | 283.3                                                  | 42.4                                                       | 188.2                                                  | 36.8                                                        | 0.936           | 0.878           |
| 1  | 395   | 60.1  | 1.520        | 470.0                | 6.7                  | 340.4                     | 244.4                     | 424.2                                                  | 57.2                                                       | 295.6                                                  | 52.2                                                        | 0.995           | 0.958           |
| 1  | 395   | 61.3  | 1.492        | 499.8                | 7.2                  | 490.8                     | 348.5                     | 607.4                                                  | 55.0                                                       | 439.0                                                  | 63.0                                                        | 0.966           | 0.901           |
| 1  | 502   | 70.8  | 1.641        | 349.9                | 5.4                  | 67.5                      | 53.1                      | 38.0                                                   | 4.5                                                        | 28.0                                                   | 4.7                                                         | 1.009           | 1.008           |
| 1  | 502   | 72.1  | 1.610        | 379.8                | 5.8                  | 148.4                     | 111.7                     | 88.3                                                   | 12.1                                                       | 64.1                                                   | 14.0                                                        | 0.893           | 0.794           |
| 1  | 502   | 73.3  | 1.584        | 409.8                | 6.3                  | 284.2                     | 201.5                     | 175.8                                                  | 27.3                                                       | 117.9                                                  | 27.6                                                        | 0.960           | 1.008           |
| 1  | 502   | 74.9  | 1.551        | 439.8                | 6.8                  | 234.5                     | 170.3                     | 280.7                                                  | 24.4                                                       | 192.7                                                  | 27.9                                                        | 0.929           | 0.878           |
| 1  | 502   | 76.2  | 1.524        | 469.8                | 7.2                  | 361.7                     | 261.2                     | 442.8                                                  | 58.0                                                       | 319.7                                                  | 63.6                                                        | 0.986           | 1.022           |
| 1  | 502   | 78.1  | 1.487        | 499.8                | 7.7                  | 570.9                     | 411.5                     | 738.2                                                  | 91.8                                                       | 529.0                                                  | 65.2                                                        | 1.019           | 0.996           |
| 2  | 164   | 25.0  | 1.581        | 349.8                | 3.8                  | 33.6                      | 24.0                      | 15.9                                                   | 4.8                                                        | 10.3                                                   | 3.1                                                         | 0.582           | 0.515           |
| 2  | 164   | 25.3  | 1.557        | 379.8                | 4.1                  | 69.5                      | 47.0                      | 37.4                                                   | 6.9                                                        | 22.5                                                   | 5.7                                                         | 0.781           | 0.750           |
| 2  | 164   | 26.1  | 1.515        | 409.8                | 4.4                  | 167.8                     | 110.2                     | 100.5                                                  | 10.8                                                       | 63.8                                                   | 8.2                                                         | 1.083           | 0.884           |
| 2  | 164   | 26.7  | 1.476        | 439.8                | 4.8                  | 170.1                     | 120.4                     | 196.7                                                  | 38.8                                                       | 137.5                                                  | 26.5                                                        | 0.923           | 0.855           |
| 2  | 164   | 27.4  | 1.438        | 469.8                | 5.1                  | 289.9                     | 199.1                     | 368.4                                                  | 42.2                                                       | 246.5                                                  | 34.9                                                        | 1.034           | 0.977           |
| 2  | 164   | 27.8  | 1.420        | 499.8                | 5.4                  | 435.0                     | 289.9                     | 546.7                                                  | 79.6                                                       | 359.8                                                  | 75.3                                                        | 0.994           | 0.997           |
| 2  | 263   | 40.4  | 1.567        | 349.8                | 4.6                  | 66.7                      | 49.1                      | 36.1                                                   | 6.5                                                        | 25.4                                                   | 6.6                                                         | 0.807           | 0.783           |
| 2  | 263   | 41.2  | 1.538        | 379.8                | 5.0                  | 142.9                     | 97.1                      | 83.8                                                   | 12.1                                                       | 54.2                                                   | 7.9                                                         | 0.849           | 0.817           |
| 2  | 263   | 42.3  | 1.495        | 409.8                | 5.3                  | 293.2                     | 214.3                     | 178.1                                                  | 21.3                                                       | 128.3                                                  | 13.5                                                        | 0.887           | 0.858           |
| 2  | 263   | 43.3  | 1.461        | 439.8                | 5.7                  | 256.9                     | 193.6                     | 301.5                                                  | 38.7                                                       | 225.4                                                  | 47.6                                                        | 0.927           | 0.949           |
| 2  | 263   | 43.7  | 1.447        | 469.8                | 6.1                  | 377.8                     | 260.0                     | 471.0                                                  | 51.9                                                       | 310.9                                                  | 42.7                                                        | 1.045           | 1.015           |

|   |     |      |       |       |     |       |       |       |       |       |       |       |       |
|---|-----|------|-------|-------|-----|-------|-------|-------|-------|-------|-------|-------|-------|
| 2 | 263 | 44.4 | 1.424 | 499.8 | 6.5 | 512.5 | 385.0 | 644.2 | 90.6  | 481.7 | 80.7  | 0.984 | 1.022 |
| 2 | 362 | 55.7 | 1.563 | 349.8 | 5.1 | 91.8  | 66.8  | 53.2  | 4.3   | 37.1  | 4.9   | 0.751 | 0.625 |
| 2 | 362 | 56.4 | 1.546 | 379.8 | 5.5 | 155.6 | 110.0 | 89.4  | 11.5  | 58.5  | 8.1   | 0.815 | 0.762 |
| 2 | 362 | 58.3 | 1.494 | 409.8 | 5.9 | 368.9 | 264.0 | 229.4 | 45.6  | 161.9 | 38.4  | 0.861 | 0.797 |
| 2 | 362 | 59.0 | 1.478 | 439.8 | 6.4 | 303.0 | 221.4 | 388.4 | 55.2  | 272.0 | 65.2  | 1.010 | 0.960 |
| 2 | 362 | 60.0 | 1.451 | 469.8 | 6.8 | 424.2 | 299.7 | 503.0 | 53.5  | 340.8 | 51.7  | 0.920 | 0.876 |
| 2 | 362 | 61.4 | 1.420 | 499.8 | 7.2 | 575.1 | 420.4 | 669.0 | 53.2  | 480.3 | 82.3  | 0.886 | 0.888 |
| 2 | 461 | 70.8 | 1.566 | 349.9 | 5.4 | 98.2  | 76.0  | 57.6  | 10.3  | 43.8  | 7.2   | 0.662 | 0.588 |
| 2 | 461 | 72.0 | 1.540 | 379.9 | 5.9 | 192.9 | 143.0 | 113.8 | 15.8  | 81.8  | 14.7  | 0.880 | 0.777 |
| 2 | 461 | 73.9 | 1.500 | 409.9 | 6.3 | 371.0 | 278.8 | 231.4 | 26.5  | 173.3 | 22.8  | 0.883 | 0.897 |
| 2 | 461 | 75.3 | 1.474 | 439.8 | 6.8 | 311.8 | 227.4 | 390.4 | 68.9  | 275.2 | 55.2  | 1.019 | 0.996 |
| 2 | 461 | 77.0 | 1.441 | 469.8 | 7.3 | 509.8 | 367.4 | 643.5 | 138.3 | 456.5 | 140.7 | 0.987 | 0.918 |
| 2 | 461 | 79.2 | 1.401 | 499.8 | 7.7 | 722.7 | 537.9 | 869.1 | 111.6 | 635.7 | 111.9 | 0.931 | 0.883 |
| 3 | 164 | 24.9 | 1.583 | 349.8 | 3.8 | 25.0  | 18.8  | 11.5  | 3.2   | 8.0   | 1.6   | 0.676 | 0.604 |
| 3 | 164 | 25.4 | 1.554 | 379.8 | 4.1 | 64.1  | 44.7  | 34.8  | 6.8   | 22.8  | 5.1   | 0.917 | 0.711 |
| 3 | 164 | 26.1 | 1.511 | 409.9 | 4.4 | 149.5 | 102.7 | 87.0  | 19.1  | 58.3  | 9.6   | 0.903 | 0.896 |
| 3 | 164 | 26.6 | 1.486 | 439.7 | 4.8 | 139.0 | 104.4 | 164.9 | 26.8  | 123.1 | 21.4  | 0.959 | 0.928 |
| 3 | 164 | 27.2 | 1.450 | 469.7 | 5.1 | 249.7 | 174.0 | 286.6 | 35.5  | 198.2 | 29.3  | 0.892 | 0.931 |
| 3 | 164 | 27.8 | 1.419 | 499.7 | 5.4 | 399.1 | 277.7 | 476.9 | 77.1  | 314.7 | 54.6  | 0.939 | 0.885 |
| 3 | 263 | 40.2 | 1.573 | 349.8 | 4.6 | 48.2  | 37.1  | 25.2  | 3.5   | 18.5  | 1.8   | 0.846 | 0.669 |
| 3 | 263 | 41.4 | 1.530 | 379.8 | 5.0 | 134.8 | 101.8 | 78.8  | 7.0   | 57.0  | 6.3   | 0.968 | 0.893 |
| 3 | 263 | 41.9 | 1.509 | 409.8 | 5.3 | 236.3 | 177.9 | 140.3 | 17.6  | 104.2 | 11.1  | 0.953 | 0.911 |
| 3 | 263 | 42.3 | 1.497 | 439.8 | 5.7 | 190.9 | 139.1 | 230.9 | 38.7  | 157.7 | 40.3  | 0.964 | 0.882 |
| 3 | 263 | 44.2 | 1.431 | 469.7 | 6.1 | 373.8 | 282.1 | 437.9 | 46.6  | 339.8 | 36.9  | 0.908 | 0.961 |
| 3 | 263 | 44.7 | 1.416 | 499.8 | 6.5 | 535.6 | 400.8 | 661.9 | 90.7  | 495.8 | 67.8  | 0.960 | 1.017 |
| 3 | 361 | 55.1 | 1.577 | 349.8 | 5.1 | 57.0  | 46.1  | 32.6  | 4.6   | 24.8  | 4.6   | 0.699 | 0.568 |
| 3 | 361 | 56.2 | 1.546 | 379.9 | 5.5 | 138.9 | 111.0 | 82.3  | 8.1   | 64.3  | 11.0  | 0.872 | 0.853 |
| 3 | 361 | 57.5 | 1.511 | 409.8 | 5.9 | 285.2 | 214.7 | 168.9 | 29.2  | 127.8 | 25.9  | 1.019 | 0.939 |
| 3 | 361 | 59.1 | 1.471 | 439.7 | 6.4 | 281.9 | 219.1 | 336.3 | 44.2  | 258.2 | 56.7  | 1.010 | 0.984 |
| 3 | 361 | 59.6 | 1.458 | 469.8 | 6.8 | 392.7 | 295.6 | 488.2 | 87.1  | 350.7 | 77.6  | 0.990 | 0.976 |
| 3 | 361 | 61.4 | 1.415 | 499.7 | 7.2 | 579.4 | 435.7 | 718.8 | 72.3  | 537.0 | 57.0  | 0.994 | 0.951 |
| 3 | 460 | 70.9 | 1.561 | 349.8 | 5.4 | 87.2  | 71.5  | 50.1  | 7.5   | 40.0  | 6.0   | 1.089 | 1.041 |
| 3 | 460 | 72.1 | 1.536 | 379.8 | 5.9 | 165.3 | 128.8 | 99.0  | 14.8  | 74.2  | 14.6  | 0.935 | 0.933 |
| 3 | 460 | 73.9 | 1.497 | 409.8 | 6.3 | 357.1 | 266.8 | 221.7 | 22.5  | 159.8 | 18.8  | 1.069 | 0.987 |
| 3 | 460 | 75.1 | 1.473 | 439.8 | 6.8 | 290.6 | 228.7 | 353.3 | 66.1  | 266.7 | 55.2  | 0.949 | 0.912 |
| 3 | 460 | 76.2 | 1.452 | 469.8 | 7.3 | 439.4 | 330.4 | 534.2 | 87.2  | 390.4 | 73.1  | 1.005 | 1.024 |
| 3 | 460 | 78.7 | 1.406 | 499.8 | 7.7 | 719.9 | 554.1 | 885.6 | 138.2 | 679.3 | 124.9 | 1.068 | 1.108 |
| 4 | 152 | 24.9 | 1.471 | 349.9 | 3.8 | 54.7  | 30.2  | 26.6  | 4.2   | 13.6  | 3.2   | 0.784 | 0.634 |
| 4 | 152 | 25.4 | 1.440 | 379.8 | 4.2 | 129.4 | 62.6  | 74.2  | 10.4  | 31.8  | 7.0   | 0.844 | 0.768 |
| 4 | 152 | 26.5 | 1.381 | 409.8 | 4.5 | 350.7 | 173.4 | 206.8 | 20.7  | 97.8  | 13.7  | 1.039 | 0.954 |
| 4 | 152 | 27.0 | 1.352 | 439.8 | 4.8 | 301.5 | 178.0 | 361.9 | 38.1  | 214.1 | 41.6  | 0.950 | 1.031 |
| 4 | 152 | 27.6 | 1.325 | 469.9 | 5.1 | 452.1 | 251.1 | 545.7 | 59.2  | 295.6 | 72.1  | 1.005 | 0.825 |



|   |     |      |       |       |     |       |       |        |       |       |       |       |       |
|---|-----|------|-------|-------|-----|-------|-------|--------|-------|-------|-------|-------|-------|
| 4 | 152 | 27.9 | 1.312 | 499.7 | 5.5 | 551.2 | 357.4 | 682.7  | 80.5  | 446.1 | 78.7  | 0.977 | 0.948 |
| 4 | 243 | 40.2 | 1.453 | 349.8 | 4.6 | 117.7 | 66.7  | 69.3   | 8.6   | 36.7  | 4.9   | 0.858 | 0.766 |
| 4 | 243 | 40.7 | 1.435 | 379.8 | 5.0 | 207.8 | 120.8 | 123.1  | 11.2  | 68.4  | 10.0  | 0.850 | 0.785 |
| 4 | 243 | 42.1 | 1.390 | 409.8 | 5.4 | 441.0 | 254.9 | 261.2  | 25.3  | 145.8 | 33.3  | 1.036 | 1.007 |
| 4 | 243 | 42.9 | 1.363 | 439.8 | 5.8 | 346.5 | 216.5 | 403.1  | 43.3  | 247.9 | 23.5  | 0.865 | 0.873 |
| 4 | 243 | 44.1 | 1.326 | 469.7 | 6.2 | 586.7 | 375.1 | 709.0  | 102.6 | 449.2 | 51.1  | 0.974 | 0.973 |
| 4 | 243 | 44.8 | 1.304 | 499.7 | 6.6 | 761.6 | 462.2 | 928.5  | 114.1 | 532.7 | 91.5  | 0.953 | 0.859 |
| 4 | 334 | 55.3 | 1.454 | 349.8 | 5.1 | 141.2 | 83.0  | 82.4   | 7.5   | 45.9  | 4.0   | 0.894 | 0.721 |
| 4 | 334 | 56.6 | 1.420 | 379.8 | 5.5 | 305.2 | 170.8 | 186.3  | 22.3  | 99.1  | 17.1  | 0.929 | 0.895 |
| 4 | 334 | 58.2 | 1.381 | 409.8 | 6.0 | 601.1 | 363.8 | 366.2  | 45.9  | 222.3 | 69.2  | 1.030 | 0.926 |
| 4 | 334 | 59.1 | 1.361 | 439.8 | 6.4 | 422.5 | 269.2 | 528.3  | 61.1  | 328.7 | 75.8  | 1.006 | 1.041 |
| 4 | 334 | 60.6 | 1.326 | 469.8 | 6.8 | 585.6 | 373.6 | 712.2  | 108.6 | 441.5 | 66.5  | 0.997 | 0.961 |
| 4 | 334 | 62.9 | 1.278 | 499.8 | 7.3 | 953.1 | 622.6 | 1196.1 | 133.3 | 772.6 | 60.5  | 0.962 | 0.952 |
| 4 | 425 | 70.4 | 1.453 | 349.8 | 5.5 | 172.8 | 100.2 | 99.4   | 9.9   | 55.2  | 8.2   | 1.017 | 0.872 |
| 4 | 425 | 72.2 | 1.416 | 379.8 | 5.9 | 351.0 | 212.6 | 214.3  | 26.2  | 126.1 | 24.4  | 0.939 | 0.896 |
| 4 | 425 | 73.3 | 1.395 | 409.8 | 6.4 | 564.9 | 367.2 | 337.2  | 43.4  | 209.9 | 43.7  | 1.090 | 1.265 |
| 4 | 425 | 75.1 | 1.363 | 439.8 | 6.8 | 431.3 | 287.3 | 516.0  | 105.6 | 336.0 | 104.3 | 0.919 | 0.856 |
| 4 | 425 | 76.9 | 1.330 | 469.7 | 7.3 | 675.9 | 437.8 | 802.0  | 135.2 | 502.0 | 109.8 | 0.951 | 0.862 |
| 4 | 425 | 79.4 | 1.289 | 499.7 | 7.8 | 982.8 | 656.9 | 1250.6 | 226.9 | 825.7 | 229.7 | 1.052 | 1.066 |
| 5 | 152 | 25.0 | 1.522 | 349.8 | 3.8 | 29.0  | 19.6  | 13.2   | 2.8   | 7.9   | 2.1   | 0.651 | 0.476 |
| 5 | 152 | 25.6 | 1.484 | 379.9 | 4.2 | 75.2  | 46.7  | 39.4   | 8.2   | 23.2  | 4.0   | 0.946 | 0.624 |
| 5 | 152 | 26.0 | 1.460 | 409.8 | 4.5 | 148.5 | 98.5  | 84.4   | 14.8  | 54.2  | 11.0  | 0.823 | 0.900 |
| 5 | 152 | 26.6 | 1.428 | 439.8 | 4.8 | 149.4 | 106.2 | 168.8  | 35.6  | 122.4 | 26.6  | 0.906 | 0.927 |
| 5 | 152 | 27.7 | 1.371 | 469.7 | 5.1 | 327.1 | 226.9 | 385.4  | 101.3 | 257.3 | 55.8  | 0.946 | 0.893 |
| 5 | 152 | 27.6 | 1.377 | 499.7 | 5.5 | 369.9 | 251.2 | 456.4  | 65.4  | 301.2 | 46.6  | 0.990 | 0.984 |
| 5 | 243 | 40.3 | 1.506 | 349.8 | 4.6 | 65.8  | 45.5  | 34.1   | 4.1   | 21.9  | 3.4   | 0.809 | 0.841 |
| 5 | 243 | 40.9 | 1.483 | 379.9 | 5.0 | 134.8 | 92.2  | 78.8   | 7.3   | 52.6  | 6.6   | 0.888 | 0.793 |
| 5 | 243 | 42.2 | 1.440 | 409.8 | 5.4 | 301.5 | 202.7 | 181.1  | 25.9  | 120.6 | 13.7  | 1.012 | 0.750 |
| 5 | 243 | 42.5 | 1.429 | 439.8 | 5.8 | 210.6 | 147.9 | 247.2  | 33.3  | 164.0 | 30.7  | 0.962 | 0.894 |
| 5 | 243 | 43.4 | 1.400 | 469.8 | 6.2 | 353.8 | 249.5 | 427.8  | 56.8  | 283.7 | 40.4  | 0.963 | 0.903 |
| 5 | 243 | 44.6 | 1.362 | 499.7 | 6.6 | 535.3 | 386.5 | 655.7  | 55.0  | 481.8 | 65.5  | 0.932 | 0.958 |
| 5 | 334 | 54.9 | 1.519 | 349.9 | 5.1 | 76.5  | 53.8  | 42.4   | 7.5   | 27.8  | 6.4   | 1.028 | 0.947 |
| 5 | 334 | 57.0 | 1.465 | 379.8 | 5.5 | 217.9 | 143.5 | 132.4  | 20.3  | 83.5  | 15.7  | 0.888 | 0.778 |
| 5 | 334 | 58.3 | 1.432 | 409.8 | 6.0 | 365.6 | 262.7 | 222.3  | 24.3  | 154.9 | 12.6  | 0.877 | 0.753 |
| 5 | 334 | 59.4 | 1.406 | 439.8 | 6.4 | 303.2 | 215.9 | 375.3  | 49.6  | 250.5 | 39.4  | 0.907 | 0.830 |
| 5 | 334 | 60.4 | 1.383 | 469.8 | 6.8 | 471.1 | 348.5 | 585.0  | 84.1  | 418.0 | 47.9  | 0.986 | 0.957 |
| 5 | 334 | 61.7 | 1.352 | 499.8 | 7.3 | 679.2 | 515.7 | 800.8  | 117.1 | 595.3 | 99.2  | 0.993 | 0.942 |
| 5 | 425 | 70.7 | 1.501 | 349.8 | 5.4 | 104.4 | 77.9  | 60.5   | 6.2   | 45.5  | 8.8   | 0.783 | 0.762 |
| 5 | 425 | 72.4 | 1.468 | 379.8 | 5.9 | 230.9 | 167.8 | 137.3  | 17.3  | 99.3  | 14.2  | 1.080 | 1.049 |
| 5 | 425 | 73.6 | 1.443 | 409.8 | 6.4 | 371.9 | 269.4 | 227.3  | 24.9  | 163.2 | 17.0  | 1.012 | 1.026 |
| 5 | 425 | 75.6 | 1.404 | 439.8 | 6.8 | 341.1 | 248.6 | 415.9  | 37.0  | 297.9 | 36.0  | 0.954 | 0.936 |
| 5 | 425 | 76.9 | 1.380 | 469.8 | 7.3 | 494.5 | 369.8 | 636.1  | 170.5 | 478.8 | 179.6 | 0.922 | 0.917 |

|   |     |      |       |       |     |       |       |       |       |       |       |       |       |
|---|-----|------|-------|-------|-----|-------|-------|-------|-------|-------|-------|-------|-------|
| 5 | 425 | 78.8 | 1.348 | 499.8 | 7.8 | 698.4 | 501.1 | 869.7 | 125.7 | 603.1 | 132.3 | 0.862 | 0.762 |
| 6 | 142 | 24.9 | 1.480 | 349.9 | 3.9 | 23.6  | 14.9  | 8.4   | 2.4   | 5.5   | 1.5   | 0.414 | 0.356 |
| 6 | 142 | 25.7 | 1.433 | 379.8 | 4.2 | 66.2  | 36.7  | 34.2  | 5.1   | 16.0  | 4.6   | 0.624 | 0.580 |
| 6 | 142 | 25.9 | 1.421 | 409.8 | 4.5 | 123.9 | 68.9  | 71.4  | 11.7  | 36.5  | 9.4   | 0.893 | 0.718 |
| 6 | 142 | 26.8 | 1.374 | 439.8 | 4.9 | 147.3 | 90.2  | 163.4 | 32.8  | 95.8  | 14.2  | 0.868 | 0.929 |
| 6 | 142 | 27.4 | 1.342 | 469.7 | 5.2 | 278.1 | 166.8 | 326.6 | 45.4  | 191.7 | 29.5  | 0.907 | 0.839 |
| 6 | 142 | 27.7 | 1.329 | 499.8 | 5.5 | 361.6 | 231.9 | 446.1 | 48.7  | 284.8 | 45.2  | 0.989 | 1.008 |
| 6 | 227 | 40.2 | 1.463 | 349.9 | 4.6 | 59.0  | 35.6  | 30.1  | 4.9   | 16.7  | 2.3   | 0.842 | 0.690 |
| 6 | 227 | 40.8 | 1.442 | 379.8 | 5.0 | 109.7 | 72.1  | 61.0  | 7.9   | 38.0  | 4.9   | 0.960 | 0.679 |
| 6 | 227 | 42.6 | 1.382 | 409.8 | 5.4 | 328.2 | 201.3 | 197.6 | 23.6  | 120.2 | 13.9  | 0.964 | 0.738 |
| 6 | 227 | 42.9 | 1.373 | 439.8 | 5.8 | 245.1 | 163.6 | 300.1 | 39.4  | 192.7 | 51.2  | 0.864 | 0.831 |
| 6 | 227 | 43.0 | 1.368 | 469.8 | 6.2 | 288.5 | 197.4 | 331.7 | 32.4  | 226.3 | 37.6  | 0.868 | 0.872 |
| 6 | 227 | 44.6 | 1.320 | 499.7 | 6.6 | 508.9 | 351.6 | 624.0 | 118.6 | 448.2 | 70.8  | 0.974 | 1.041 |
| 6 | 312 | 55.1 | 1.466 | 349.8 | 5.1 | 77.8  | 51.3  | 41.9  | 11.5  | 27.2  | 9.1   | 0.800 | 0.637 |
| 6 | 312 | 56.5 | 1.432 | 379.8 | 5.6 | 171.5 | 115.8 | 97.3  | 15.4  | 62.9  | 13.9  | 1.012 | 1.017 |
| 6 | 312 | 57.6 | 1.404 | 409.9 | 6.0 | 334.6 | 211.7 | 205.8 | 36.1  | 127.7 | 33.9  | 0.955 | 0.795 |
| 6 | 312 | 59.7 | 1.354 | 439.8 | 6.5 | 321.6 | 218.4 | 376.7 | 53.7  | 249.4 | 35.0  | 0.925 | 0.944 |
| 6 | 312 | 60.0 | 1.348 | 469.8 | 6.9 | 412.8 | 284.3 | 497.9 | 45.7  | 335.1 | 55.3  | 0.941 | 0.892 |
| 6 | 312 | 61.7 | 1.311 | 499.8 | 7.3 | 623.2 | 451.8 | 788.7 | 111.0 | 568.5 | 110.5 | 1.009 | 1.009 |
| 6 | 397 | 70.5 | 1.459 | 349.8 | 5.5 | 100.9 | 69.5  | 59.1  | 11.2  | 39.9  | 9.5   | 0.748 | 0.601 |
| 6 | 397 | 71.9 | 1.431 | 379.8 | 5.9 | 195.7 | 137.4 | 113.3 | 24.4  | 78.3  | 23.6  | 0.959 | 0.879 |
| 6 | 397 | 73.9 | 1.393 | 409.8 | 6.4 | 386.4 | 254.2 | 227.9 | 19.4  | 142.8 | 14.4  | 0.979 | 0.954 |
| 6 | 397 | 75.8 | 1.357 | 439.8 | 6.9 | 348.6 | 250.5 | 415.6 | 77.3  | 291.2 | 46.4  | 0.990 | 1.021 |
| 6 | 397 | 76.8 | 1.340 | 469.8 | 7.4 | 478.9 | 348.8 | 585.8 | 62.3  | 427.3 | 87.9  | 0.943 | 0.920 |
| 6 | 397 | 78.9 | 1.303 | 499.8 | 7.8 | 758.1 | 549.0 | 969.5 | 245.4 | 698.2 | 270.7 | 0.956 | 0.956 |
| 7 | 132 | 24.9 | 1.424 | 349.8 | 3.9 | 31.8  | 20.4  | 12.1  | 1.8   | 8.1   | 2.2   | 0.667 | 0.558 |
| 7 | 132 | 25.4 | 1.397 | 379.9 | 4.2 | 67.1  | 42.8  | 34.4  | 4.6   | 20.0  | 4.1   | 0.703 | 0.834 |
| 7 | 132 | 26.1 | 1.357 | 409.9 | 4.5 | 163.8 | 102.5 | 95.6  | 15.2  | 58.7  | 11.1  | 0.785 | 0.771 |
| 7 | 132 | 26.7 | 1.328 | 439.8 | 4.9 | 165.2 | 112.9 | 187.3 | 26.6  | 125.4 | 16.1  | 0.834 | 0.818 |
| 7 | 132 | 27.1 | 1.307 | 469.9 | 5.2 | 266.5 | 184.8 | 323.6 | 35.2  | 212.7 | 43.0  | 0.992 | 0.878 |
| 7 | 132 | 27.8 | 1.276 | 499.8 | 5.6 | 401.2 | 279.4 | 481.9 | 64.8  | 344.1 | 59.8  | 0.956 | 0.985 |
| 7 | 212 | 39.9 | 1.426 | 349.9 | 4.7 | 62.5  | 43.2  | 31.7  | 4.5   | 22.0  | 4.4   | 0.720 | 0.640 |
| 7 | 212 | 41.1 | 1.383 | 379.8 | 5.1 | 153.3 | 105.5 | 87.1  | 12.6  | 57.1  | 9.7   | 0.830 | 0.796 |
| 7 | 212 | 41.9 | 1.358 | 409.8 | 5.5 | 265.8 | 195.9 | 157.8 | 25.0  | 113.3 | 15.0  | 0.838 | 1.053 |
| 7 | 212 | 43.1 | 1.321 | 439.8 | 5.9 | 253.0 | 188.1 | 305.6 | 35.6  | 224.4 | 23.2  | 0.931 | 0.901 |
| 7 | 212 | 43.7 | 1.303 | 469.8 | 6.3 | 374.4 | 283.7 | 447.3 | 69.7  | 332.8 | 59.7  | 0.890 | 0.896 |
| 7 | 212 | 45.9 | 1.240 | 499.7 | 6.7 | 674.5 | 545.6 | 813.8 | 79.8  | 654.1 | 95.4  | 0.964 | 0.986 |
| 7 | 291 | 55.2 | 1.416 | 349.8 | 5.2 | 93.9  | 65.2  | 52.1  | 8.5   | 35.0  | 7.3   | 0.885 | 0.895 |
| 7 | 291 | 56.1 | 1.392 | 379.8 | 5.6 | 185.1 | 140.0 | 106.5 | 18.8  | 80.4  | 19.9  | 0.999 | 1.003 |
| 7 | 291 | 58.4 | 1.338 | 409.8 | 6.0 | 454.0 | 330.8 | 270.9 | 32.4  | 191.4 | 22.9  | 1.072 | 1.101 |
| 7 | 291 | 59.4 | 1.316 | 439.8 | 6.5 | 340.6 | 257.3 | 415.3 | 57.1  | 306.1 | 50.5  | 0.992 | 1.021 |
| 7 | 291 | 60.5 | 1.292 | 469.8 | 6.9 | 504.9 | 382.8 | 614.3 | 75.8  | 458.5 | 64.6  | 1.015 | 1.028 |

|   |     |      |       |       |     |       |       |       |       |       |       |       |       |
|---|-----|------|-------|-------|-----|-------|-------|-------|-------|-------|-------|-------|-------|
| 7 | 291 | 61.8 | 1.264 | 499.8 | 7.4 | 688.2 | 532.6 | 828.4 | 105.0 | 650.6 | 58.5  | 0.987 | 1.051 |
| 7 | 371 | 70.4 | 1.414 | 349.8 | 5.5 | 112.0 | 80.4  | 63.5  | 12.4  | 44.7  | 9.3   | 0.806 | 0.767 |
| 7 | 371 | 72.3 | 1.377 | 379.8 | 6.0 | 232.6 | 165.8 | 134.6 | 13.3  | 95.2  | 9.1   | 0.863 | 0.755 |
| 7 | 371 | 73.5 | 1.354 | 409.8 | 6.4 | 412.4 | 310.5 | 253.4 | 39.8  | 190.6 | 28.6  | 0.990 | 0.884 |
| 7 | 371 | 75.5 | 1.319 | 439.8 | 6.9 | 404.4 | 319.6 | 518.4 | 83.3  | 407.9 | 100.7 | 1.028 | 0.975 |
| 7 | 371 | 77.7 | 1.282 | 469.8 | 7.4 | 585.0 | 450.7 | 724.1 | 135.8 | 556.5 | 174.8 | 0.988 | 0.986 |
| 7 | 371 | 79.1 | 1.259 | 499.8 | 7.9 | 796.3 | 658.2 | 961.1 | 180.3 | 794.9 | 153.5 | 0.846 | 0.873 |
| 8 | 132 | 24.7 | 1.435 | 349.8 | 3.9 | 24.6  | 15.2  | 8.6   | 2.4   | 5.6   | 2.4   | 0.470 | 0.474 |
| 8 | 132 | 25.3 | 1.399 | 379.8 | 4.2 | 61.8  | 34.1  | 29.1  | 7.6   | 14.6  | 3.6   | 0.818 | 0.555 |
| 8 | 132 | 25.5 | 1.388 | 409.8 | 4.5 | 102.8 | 60.5  | 54.0  | 7.9   | 30.2  | 7.2   | 0.829 | 0.707 |
| 8 | 132 | 26.5 | 1.337 | 439.8 | 4.9 | 144.2 | 88.6  | 166.9 | 36.1  | 93.2  | 25.6  | 0.854 | 0.848 |
| 8 | 132 | 27.3 | 1.297 | 469.7 | 5.2 | 281.3 | 184.9 | 348.1 | 55.4  | 226.0 | 49.0  | 0.975 | 0.953 |
| 8 | 132 | 27.4 | 1.294 | 499.7 | 5.5 | 330.1 | 233.2 | 406.4 | 54.2  | 272.5 | 49.3  | 1.006 | 0.993 |
| 8 | 212 | 40.0 | 1.424 | 349.8 | 4.7 | 54.6  | 34.0  | 26.5  | 2.1   | 16.1  | 2.8   | 0.690 | 0.529 |
| 8 | 212 | 41.2 | 1.380 | 379.8 | 5.1 | 152.5 | 93.9  | 86.9  | 7.5   | 51.3  | 6.7   | 0.907 | 0.855 |
| 8 | 212 | 42.0 | 1.354 | 409.8 | 5.5 | 303.5 | 190.5 | 179.3 | 19.2  | 109.0 | 15.4  | 1.077 | 1.072 |
| 8 | 212 | 42.5 | 1.340 | 439.8 | 5.9 | 209.8 | 147.9 | 241.7 | 43.5  | 159.5 | 29.7  | 0.907 | 0.760 |
| 8 | 212 | 43.4 | 1.312 | 469.8 | 6.3 | 350.8 | 242.0 | 424.3 | 54.1  | 293.5 | 77.0  | 0.906 | 0.898 |
| 8 | 212 | 45.0 | 1.263 | 499.7 | 6.7 | 624.0 | 442.6 | 756.6 | 115.7 | 520.5 | 105.6 | 1.015 | 0.998 |
| 8 | 291 | 55.1 | 1.418 | 349.9 | 5.2 | 75.8  | 50.2  | 38.8  | 5.0   | 24.4  | 3.7   | 0.722 | 0.618 |
| 8 | 291 | 56.1 | 1.392 | 379.8 | 5.6 | 177.9 | 116.7 | 100.1 | 10.0  | 62.3  | 7.3   | 0.853 | 0.760 |
| 8 | 291 | 57.6 | 1.355 | 409.8 | 6.0 | 329.5 | 237.7 | 198.0 | 27.4  | 142.2 | 24.9  | 0.937 | 0.888 |
| 8 | 291 | 58.8 | 1.329 | 439.8 | 6.5 | 285.2 | 207.9 | 350.0 | 56.8  | 255.3 | 58.3  | 0.976 | 1.014 |
| 8 | 291 | 60.2 | 1.298 | 469.8 | 6.9 | 462.6 | 331.2 | 556.0 | 71.1  | 387.9 | 52.2  | 0.948 | 0.908 |
| 8 | 291 | 61.9 | 1.261 | 499.8 | 7.4 | 742.6 | 548.3 | 926.2 | 155.3 | 694.3 | 161.4 | 1.075 | 1.040 |
| 8 | 371 | 70.7 | 1.408 | 349.8 | 5.5 | 101.3 | 68.1  | 57.1  | 13.5  | 37.3  | 8.4   | 0.741 | 0.644 |
| 8 | 371 | 71.9 | 1.385 | 379.8 | 6.0 | 211.3 | 143.2 | 123.5 | 11.6  | 80.6  | 12.4  | 0.883 | 0.839 |
| 8 | 371 | 74.1 | 1.344 | 409.8 | 6.4 | 459.6 | 321.0 | 282.6 | 63.9  | 198.3 | 52.9  | 1.047 | 0.936 |
| 8 | 371 | 75.3 | 1.322 | 439.8 | 6.9 | 326.8 | 241.0 | 383.8 | 48.8  | 275.7 | 55.6  | 0.930 | 0.905 |
| 8 | 371 | 76.9 | 1.296 | 469.7 | 7.4 | 523.6 | 402.1 | 629.7 | 91.8  | 481.6 | 86.8  | 1.014 | 1.024 |
| 8 | 371 | 79.0 | 1.261 | 499.7 | 7.9 | 745.7 | 540.6 | 906.9 | 62.9  | 638.8 | 78.0  | 0.970 | 0.971 |
| 9 | 132 | 24.8 | 1.429 | 349.8 | 3.9 | 18.9  | 14.0  | 8.2   | 2.4   | 5.3   | 1.5   | 0.593 | 0.342 |
| 9 | 132 | 25.8 | 1.372 | 379.7 | 4.2 | 70.6  | 45.2  | 37.6  | 4.6   | 21.0  | 5.6   | 0.746 | 0.701 |
| 9 | 132 | 25.5 | 1.390 | 409.8 | 4.5 | 77.4  | 49.2  | 39.7  | 7.2   | 24.1  | 7.0   | 0.970 | 0.825 |
| 9 | 132 | 26.1 | 1.356 | 439.8 | 4.9 | 97.1  | 66.2  | 102.9 | 17.6  | 64.5  | 14.2  | 0.749 | 0.695 |
| 9 | 132 | 26.8 | 1.321 | 469.7 | 5.2 | 195.2 | 128.1 | 231.6 | 31.2  | 148.3 | 34.6  | 0.948 | 0.848 |
| 9 | 132 | 27.8 | 1.275 | 499.7 | 5.6 | 359.2 | 263.7 | 417.1 | 72.8  | 304.5 | 36.3  | 0.903 | 0.917 |
| 9 | 212 | 40.1 | 1.419 | 349.8 | 4.7 | 45.2  | 33.2  | 22.1  | 4.6   | 14.8  | 3.1   | 0.771 | 0.746 |
| 9 | 212 | 41.1 | 1.384 | 379.8 | 5.1 | 114.0 | 80.4  | 63.9  | 10.1  | 44.6  | 7.5   | 0.743 | 0.670 |
| 9 | 212 | 42.0 | 1.355 | 409.8 | 5.5 | 245.2 | 165.1 | 141.2 | 26.6  | 95.9  | 17.6  | 1.181 | 0.946 |
| 9 | 212 | 43.1 | 1.322 | 439.8 | 5.9 | 230.4 | 175.6 | 275.9 | 68.0  | 207.6 | 49.0  | 0.895 | 0.871 |
| 9 | 212 | 44.0 | 1.293 | 469.8 | 6.3 | 358.3 | 259.2 | 422.6 | 54.4  | 290.6 | 76.2  | 0.949 | 0.962 |

|    |     |      |       |       |     |       |       |       |       |       |       |       |       |
|----|-----|------|-------|-------|-----|-------|-------|-------|-------|-------|-------|-------|-------|
| 9  | 212 | 44.6 | 1.275 | 499.8 | 6.7 | 478.3 | 371.6 | 574.3 | 79.0  | 453.2 | 57.5  | 0.929 | 1.027 |
| 9  | 291 | 55.5 | 1.409 | 349.9 | 5.2 | 64.8  | 47.6  | 34.2  | 2.0   | 23.7  | 3.3   | 0.883 | 0.959 |
| 9  | 291 | 56.4 | 1.386 | 379.9 | 5.6 | 142.7 | 106.9 | 78.8  | 13.9  | 58.2  | 13.7  | 1.100 | 1.095 |
| 9  | 291 | 57.8 | 1.352 | 409.8 | 6.0 | 291.8 | 217.7 | 176.1 | 43.2  | 137.3 | 34.4  | 0.872 | 0.680 |
| 9  | 291 | 58.8 | 1.329 | 439.8 | 6.5 | 239.8 | 184.9 | 287.3 | 47.5  | 217.8 | 39.9  | 0.961 | 0.919 |
| 9  | 291 | 60.9 | 1.282 | 469.8 | 6.9 | 494.8 | 393.3 | 607.8 | 147.6 | 477.3 | 146.2 | 0.992 | 0.968 |
| 9  | 291 | 61.9 | 1.262 | 499.8 | 7.4 | 624.3 | 472.0 | 785.9 | 150.8 | 588.8 | 138.8 | 0.970 | 0.928 |
| 9  | 371 | 70.4 | 1.415 | 349.8 | 5.5 | 76.5  | 59.6  | 41.3  | 4.7   | 32.2  | 6.0   | 0.815 | 0.656 |
| 9  | 371 | 71.9 | 1.386 | 379.8 | 6.0 | 162.9 | 127.2 | 91.9  | 11.0  | 70.3  | 11.8  | 0.967 | 0.958 |
| 9  | 371 | 73.7 | 1.352 | 409.8 | 6.4 | 338.1 | 256.8 | 202.7 | 35.3  | 155.1 | 32.8  | 0.989 | 0.923 |
| 9  | 371 | 74.9 | 1.329 | 439.8 | 6.9 | 271.8 | 212.7 | 330.6 | 74.7  | 253.8 | 78.9  | 0.998 | 0.941 |
| 9  | 371 | 77.2 | 1.290 | 469.8 | 7.4 | 448.6 | 368.4 | 545.2 | 48.8  | 445.4 | 36.5  | 0.946 | 0.925 |
| 9  | 371 | 78.7 | 1.265 | 499.8 | 7.9 | 686.3 | 541.5 | 867.6 | 177.5 | 680.5 | 189.7 | 1.032 | 1.053 |
| 10 | 125 | 25.0 | 1.390 | 349.8 | 3.9 | 24.0  | 15.0  | 6.7   | 1.9   | 5.6   | 1.4   | 0.641 | 0.427 |
| 10 | 125 | 25.5 | 1.361 | 379.8 | 4.3 | 41.4  | 23.3  | 16.6  | 3.7   | 8.8   | 3.3   | 0.540 | 0.410 |
| 10 | 125 | 26.0 | 1.333 | 409.8 | 4.6 | 78.0  | 47.4  | 38.7  | 9.8   | 21.2  | 5.1   | 0.626 | 0.693 |
| 10 | 125 | 26.2 | 1.323 | 440.0 | 4.9 | 79.7  | 48.7  | 77.8  | 13.2  | 43.3  | 11.2  | 0.731 | 0.671 |
| 10 | 125 | 26.9 | 1.292 | 469.8 | 5.3 | 157.1 | 94.6  | 173.8 | 28.8  | 97.3  | 30.2  | 0.888 | 0.832 |
| 10 | 125 | 27.9 | 1.243 | 499.8 | 5.6 | 341.4 | 237.2 | 413.8 | 56.4  | 274.0 | 51.4  | 0.971 | 0.898 |
| 10 | 200 | 40.2 | 1.383 | 349.8 | 4.7 | 37.8  | 23.9  | 15.1  | 2.9   | 10.6  | 3.7   | 0.707 | 0.547 |
| 10 | 200 | 41.1 | 1.353 | 379.8 | 5.1 | 96.5  | 67.6  | 51.0  | 10.6  | 36.5  | 8.4   | 0.909 | 0.763 |
| 10 | 200 | 41.5 | 1.337 | 409.8 | 5.5 | 161.9 | 110.2 | 92.2  | 10.4  | 62.2  | 12.2  | 0.742 | 0.824 |
| 10 | 200 | 42.4 | 1.308 | 439.8 | 5.9 | 163.7 | 122.3 | 185.6 | 37.2  | 137.3 | 23.7  | 0.858 | 0.808 |
| 10 | 200 | 43.9 | 1.266 | 469.8 | 6.3 | 315.1 | 225.7 | 361.4 | 67.5  | 248.1 | 38.9  | 0.851 | 0.788 |
| 10 | 200 | 44.8 | 1.238 | 499.9 | 6.7 | 475.4 | 350.7 | 552.6 | 85.7  | 408.6 | 32.8  | 0.845 | 0.816 |
| 10 | 275 | 55.5 | 1.376 | 349.8 | 5.2 | 63.4  | 42.1  | 31.4  | 5.9   | 20.7  | 3.5   | 0.696 | 0.615 |
| 10 | 275 | 56.1 | 1.361 | 379.8 | 5.6 | 105.3 | 74.3  | 58.3  | 12.0  | 40.4  | 11.7  | 0.651 | 0.757 |
| 10 | 275 | 57.7 | 1.323 | 409.8 | 6.1 | 257.9 | 187.7 | 156.2 | 21.0  | 112.2 | 20.4  | 0.896 | 0.779 |
| 10 | 275 | 58.6 | 1.303 | 439.9 | 6.5 | 225.6 | 170.0 | 259.8 | 48.8  | 192.5 | 41.4  | 0.902 | 0.911 |
| 10 | 275 | 60.6 | 1.260 | 469.8 | 7.0 | 391.8 | 291.0 | 481.1 | 73.6  | 348.0 | 47.3  | 0.960 | 0.918 |
| 10 | 275 | 61.5 | 1.242 | 499.8 | 7.4 | 574.2 | 448.0 | 708.2 | 165.3 | 553.8 | 123.0 | 0.931 | 0.921 |
| 10 | 350 | 70.0 | 1.388 | 349.8 | 5.5 | 54.7  | 39.6  | 27.1  | 6.4   | 19.6  | 6.1   | 0.559 | 0.595 |
| 10 | 350 | 71.9 | 1.352 | 379.8 | 6.0 | 151.7 | 114.8 | 87.3  | 14.6  | 65.6  | 15.1  | 0.939 | 0.943 |
| 10 | 350 | 73.9 | 1.316 | 409.8 | 6.5 | 320.0 | 231.8 | 195.1 | 37.9  | 141.8 | 39.4  | 0.980 | 0.928 |
| 10 | 350 | 75.8 | 1.282 | 439.8 | 7.0 | 328.0 | 251.8 | 416.4 | 77.9  | 310.6 | 100.4 | 1.002 | 0.972 |
| 10 | 350 | 77.0 | 1.262 | 469.8 | 7.4 | 440.9 | 339.9 | 523.5 | 98.9  | 395.7 | 100.1 | 1.013 | 0.976 |
| 10 | 350 | 79.4 | 1.224 | 499.8 | 7.9 | 710.8 | 572.6 | 823.3 | 145.9 | 653.5 | 166.7 | 0.899 | 0.897 |
| 11 | 132 | 25.1 | 1.411 | 349.8 | 3.9 | 88.6  | 39.5  | 48.5  | 7.5   | 18.3  | 3.2   | 0.781 | 0.526 |
| 11 | 132 | 25.6 | 1.385 | 379.8 | 4.2 | 156.3 | 78.7  | 89.0  | 13.6  | 39.8  | 8.2   | 0.956 | 0.758 |
| 11 | 132 | 26.4 | 1.341 | 409.8 | 4.5 | 343.8 | 192.4 | 214.7 | 25.9  | 114.2 | 20.3  | 0.799 | 0.818 |
| 11 | 132 | 27.0 | 1.314 | 439.8 | 4.9 | 296.0 | 169.6 | 355.8 | 65.5  | 196.7 | 36.2  | 0.984 | 0.870 |
| 11 | 132 | 27.3 | 1.298 | 469.8 | 5.2 | 423.8 | 236.7 | 513.8 | 97.2  | 286.9 | 46.9  | 1.008 | 0.935 |

|    |     |      |       |       |     |       |       |        |       |       |       |       |       |
|----|-----|------|-------|-------|-----|-------|-------|--------|-------|-------|-------|-------|-------|
| 11 | 132 | 28.5 | 1.243 | 499.9 | 5.5 | 726.9 | 440.0 | 887.0  | 153.2 | 539.3 | 65.0  | 0.952 | 1.021 |
| 11 | 211 | 40.3 | 1.406 | 349.8 | 4.7 | 142.5 | 78.0  | 81.8   | 10.1  | 43.2  | 5.1   | 0.887 | 0.743 |
| 11 | 211 | 41.1 | 1.378 | 379.9 | 5.1 | 279.4 | 149.3 | 166.8  | 24.9  | 88.1  | 18.3  | 0.901 | 0.795 |
| 11 | 211 | 42.3 | 1.338 | 409.9 | 5.5 | 526.8 | 310.8 | 325.8  | 20.7  | 193.6 | 33.2  | 0.989 | 0.864 |
| 11 | 211 | 43.4 | 1.306 | 439.8 | 5.9 | 428.7 | 257.2 | 519.7  | 61.6  | 311.0 | 54.5  | 1.030 | 0.987 |
| 11 | 211 | 44.0 | 1.286 | 469.8 | 6.3 | 558.6 | 363.0 | 668.5  | 68.5  | 412.1 | 59.8  | 0.960 | 0.857 |
| 11 | 211 | 45.4 | 1.248 | 499.8 | 6.7 | 825.3 | 532.9 | 1022.8 | 97.2  | 650.6 | 86.2  | 1.034 | 1.025 |
| 11 | 290 | 55.5 | 1.403 | 349.8 | 5.2 | 172.0 | 105.5 | 100.9  | 10.0  | 59.7  | 9.2   | 0.906 | 0.881 |
| 11 | 290 | 56.7 | 1.373 | 379.8 | 5.6 | 334.8 | 193.6 | 196.8  | 25.5  | 112.9 | 19.7  | 1.031 | 0.891 |
| 11 | 290 | 58.2 | 1.337 | 409.8 | 6.0 | 625.0 | 415.5 | 383.4  | 74.4  | 254.3 | 75.2  | 0.905 | 0.996 |
| 11 | 290 | 59.9 | 1.300 | 439.8 | 6.5 | 473.1 | 330.1 | 566.0  | 82.3  | 404.5 | 46.5  | 0.922 | 0.972 |
| 11 | 290 | 60.9 | 1.278 | 469.8 | 6.9 | 655.1 | 447.3 | 788.8  | 94.2  | 528.2 | 104.3 | 0.988 | 0.985 |
| 11 | 290 | 62.6 | 1.244 | 499.8 | 7.4 | 910.2 | 652.7 | 1095.3 | 143.7 | 789.1 | 108.8 | 0.970 | 1.020 |
| 11 | 369 | 70.9 | 1.396 | 349.8 | 5.5 | 213.6 | 128.2 | 122.6  | 16.8  | 72.4  | 14.0  | 0.997 | 0.942 |
| 11 | 369 | 72.5 | 1.367 | 379.8 | 6.0 | 407.8 | 252.3 | 247.7  | 39.0  | 152.8 | 40.9  | 0.978 | 0.911 |
| 11 | 369 | 72.9 | 1.359 | 409.8 | 6.4 | 539.1 | 333.0 | 336.2  | 44.5  | 203.6 | 32.8  | 0.981 | 0.968 |
| 11 | 369 | 75.8 | 1.307 | 439.9 | 6.9 | 507.1 | 336.3 | 605.9  | 73.4  | 401.3 | 54.3  | 0.916 | 0.916 |
| 11 | 369 | 77.1 | 1.284 | 469.8 | 7.4 | 674.8 | 463.3 | 837.4  | 120.3 | 563.2 | 100.4 | 0.906 | 0.899 |
| 11 | 369 | 79.4 | 1.247 | 499.8 | 7.9 | 954.1 | 692.5 | 1142.4 | 153.5 | 814.7 | 168.8 | 0.890 | 0.861 |
| 12 | 106 | 25.2 | 1.286 | 349.8 | 4.0 | 47.2  | 28.2  | 22.4   | 4.9   | 11.8  | 2.5   | 0.594 | 0.645 |
| 12 | 106 | 25.7 | 1.258 | 379.8 | 4.3 | 107.3 | 66.3  | 56.7   | 9.2   | 34.0  | 4.5   | 0.866 | 0.826 |
| 12 | 106 | 26.0 | 1.245 | 409.8 | 4.7 | 171.5 | 115.8 | 101.1  | 15.3  | 67.8  | 10.8  | 0.788 | 0.773 |
| 12 | 106 | 26.8 | 1.206 | 439.8 | 5.0 | 183.0 | 129.4 | 205.7  | 37.4  | 153.0 | 19.0  | 0.915 | 0.939 |
| 12 | 106 | 27.7 | 1.170 | 469.7 | 5.4 | 311.5 | 218.5 | 352.2  | 62.5  | 251.9 | 46.7  | 0.905 | 0.822 |
| 12 | 106 | 28.1 | 1.151 | 499.7 | 5.7 | 425.8 | 315.4 | 500.6  | 71.8  | 380.6 | 57.7  | 0.919 | 0.947 |
| 12 | 169 | 40.0 | 1.290 | 349.8 | 4.8 | 71.3  | 48.4  | 38.2   | 2.5   | 24.0  | 6.7   | 0.763 | 0.896 |
| 12 | 169 | 41.2 | 1.252 | 379.8 | 5.2 | 170.8 | 119.0 | 96.8   | 18.5  | 65.0  | 12.3  | 0.924 | 1.063 |
| 12 | 169 | 42.1 | 1.227 | 409.8 | 5.6 | 300.8 | 222.8 | 179.5  | 28.7  | 133.1 | 26.5  | 0.895 | 0.907 |
| 12 | 169 | 43.2 | 1.194 | 439.8 | 6.0 | 275.5 | 210.3 | 344.3  | 41.3  | 256.7 | 34.6  | 0.961 | 0.941 |
| 12 | 169 | 44.7 | 1.154 | 469.8 | 6.4 | 463.6 | 379.2 | 540.2  | 62.9  | 440.0 | 75.8  | 0.847 | 0.794 |
| 12 | 169 | 45.8 | 1.128 | 499.8 | 6.8 | 628.8 | 527.7 | 696.5  | 100.6 | 629.6 | 126.7 | 0.853 | 1.006 |
| 12 | 232 | 55.6 | 1.275 | 349.9 | 5.2 | 100.0 | 69.6  | 54.9   | 5.4   | 37.6  | 7.0   | 0.683 | 0.704 |
| 12 | 232 | 56.3 | 1.258 | 379.8 | 5.7 | 204.5 | 148.7 | 119.3  | 21.0  | 89.2  | 17.6  | 0.854 | 0.805 |
| 12 | 232 | 58.1 | 1.220 | 409.8 | 6.1 | 404.6 | 296.6 | 247.2  | 40.3  | 183.1 | 41.1  | 0.995 | 0.855 |
| 12 | 232 | 59.2 | 1.196 | 439.8 | 6.6 | 298.2 | 235.2 | 342.0  | 50.5  | 275.2 | 51.2  | 0.917 | 0.909 |
| 12 | 232 | 60.8 | 1.166 | 469.8 | 7.0 | 468.4 | 392.5 | 530.5  | 125.0 | 453.7 | 122.6 | 0.867 | 0.932 |
| 12 | 232 | 62.2 | 1.140 | 499.7 | 7.5 | 695.0 | 593.5 | 826.7  | 211.4 | 717.4 | 165.3 | 1.040 | 1.052 |
| 12 | 296 | 70.9 | 1.275 | 349.8 | 5.6 | 125.7 | 90.6  | 71.3   | 16.6  | 52.0  | 14.1  | 0.899 | 0.875 |
| 12 | 296 | 72.7 | 1.243 | 379.8 | 6.1 | 246.1 | 188.5 | 135.6  | 19.7  | 105.3 | 14.7  | 0.951 | 0.968 |
| 12 | 296 | 74.4 | 1.215 | 409.8 | 6.5 | 433.0 | 329.4 | 258.9  | 50.1  | 198.0 | 39.0  | 0.996 | 0.857 |
| 12 | 296 | 75.9 | 1.192 | 439.8 | 7.0 | 378.0 | 310.4 | 449.4  | 68.0  | 385.2 | 75.4  | 1.012 | 1.083 |
| 12 | 296 | 77.6 | 1.165 | 469.8 | 7.5 | 535.7 | 455.8 | 635.2  | 92.0  | 542.1 | 106.3 | 0.952 | 0.955 |

|    |     |      |       |       |     |        |       |        |       |        |       |       |       |
|----|-----|------|-------|-------|-----|--------|-------|--------|-------|--------|-------|-------|-------|
| 12 | 296 | 80.5 | 1.124 | 499.8 | 8.0 | 831.7  | 744.5 | 1021.9 | 124.8 | 904.6  | 117.2 | 0.997 | 1.009 |
| 13 | 200 | 25.2 | 1.345 | 349.8 | 4.0 | 54.8   | 18.9  | 27.9   | 5.4   | 8.3    | 1.4   | 0.738 | 0.318 |
| 13 | 200 | 25.6 | 1.320 | 379.9 | 4.3 | 129.1  | 56.2  | 74.4   | 9.0   | 32.3   | 8.2   | 0.934 | 0.809 |
| 13 | 200 | 26.3 | 1.288 | 409.8 | 4.7 | 248.1  | 141.6 | 150.0  | 11.5  | 86.3   | 12.1  | 0.947 | 0.874 |
| 13 | 200 | 26.6 | 1.273 | 439.7 | 5.0 | 223.6  | 127.6 | 263.1  | 33.7  | 154.2  | 27.6  | 0.968 | 0.952 |
| 13 | 200 | 27.8 | 1.215 | 469.8 | 5.4 | 453.4  | 316.3 | 536.0  | 63.8  | 367.5  | 56.4  | 0.980 | 0.857 |
| 13 | 200 | 28.9 | 1.173 | 499.7 | 5.7 | 742.6  | 546.7 | 903.0  | 82.7  | 674.3  | 83.4  | 0.997 | 0.975 |
| 13 | 319 | 40.3 | 1.340 | 349.8 | 4.8 | 120.0  | 64.4  | 69.5   | 9.3   | 37.2   | 6.3   | 0.899 | 1.009 |
| 13 | 319 | 40.9 | 1.321 | 379.8 | 5.2 | 216.3  | 128.4 | 129.4  | 17.6  | 75.0   | 8.7   | 1.002 | 1.181 |
| 13 | 319 | 42.3 | 1.276 | 409.8 | 5.6 | 484.4  | 332.1 | 298.9  | 36.2  | 205.7  | 29.2  | 1.044 | 1.116 |
| 13 | 319 | 43.2 | 1.250 | 439.8 | 6.0 | 389.3  | 273.4 | 465.8  | 60.0  | 336.3  | 44.6  | 0.969 | 1.050 |
| 13 | 319 | 44.7 | 1.208 | 469.8 | 6.4 | 648.5  | 478.5 | 792.1  | 100.4 | 577.6  | 72.4  | 1.001 | 0.995 |
| 13 | 319 | 45.8 | 1.178 | 499.8 | 6.8 | 872.0  | 691.5 | 1033.7 | 97.0  | 828.9  | 64.4  | 0.922 | 0.969 |
| 13 | 439 | 55.7 | 1.335 | 349.8 | 5.2 | 158.3  | 98.0  | 93.4   | 8.7   | 58.7   | 7.7   | 0.983 | 1.003 |
| 13 | 439 | 57.0 | 1.302 | 379.9 | 5.7 | 340.0  | 214.7 | 205.7  | 19.1  | 130.9  | 12.6  | 1.025 | 0.972 |
| 13 | 439 | 58.5 | 1.270 | 409.8 | 6.1 | 604.0  | 432.7 | 370.9  | 49.9  | 271.3  | 43.4  | 0.965 | 0.907 |
| 13 | 439 | 59.4 | 1.252 | 439.9 | 6.6 | 434.5  | 333.6 | 516.6  | 62.8  | 404.8  | 78.3  | 0.963 | 1.002 |
| 13 | 439 | 61.2 | 1.214 | 469.8 | 7.0 | 714.5  | 551.0 | 871.0  | 87.5  | 683.0  | 103.6 | 1.004 | 1.018 |
| 13 | 439 | 62.5 | 1.188 | 499.8 | 7.5 | 1074.7 | 831.0 | 1361.1 | 369.3 | 1035.4 | 330.4 | 1.071 | 1.026 |
| 13 | 559 | 70.8 | 1.336 | 349.9 | 5.6 | 189.1  | 125.4 | 112.8  | 20.6  | 77.4   | 20.2  | 0.815 | 0.752 |
| 13 | 559 | 72.4 | 1.306 | 379.9 | 6.1 | 357.8  | 243.2 | 216.7  | 17.2  | 148.2  | 24.9  | 1.061 | 1.126 |
| 13 | 559 | 73.7 | 1.283 | 409.8 | 6.5 | 600.2  | 439.2 | 374.9  | 55.1  | 276.3  | 43.5  | 1.020 | 1.071 |
| 13 | 559 | 76.1 | 1.243 | 439.8 | 7.0 | 511.4  | 384.8 | 633.7  | 91.4  | 478.8  | 76.9  | 0.996 | 0.991 |
| 13 | 559 | 78.4 | 1.207 | 469.8 | 7.5 | 781.6  | 621.7 | 920.3  | 123.3 | 723.9  | 67.1  | 0.909 | 0.989 |
| 13 | 559 | 80.2 | 1.179 | 499.7 | 8.0 | 1130.7 | 918.0 | 1426.3 | 212.8 | 1176.6 | 244.8 | 0.929 | 0.954 |
| 14 | 170 | 25.0 | 1.275 | 329.9 | 3.8 | 20.9   | 9.6   | 10.0   | 2.5   | 3.3    | 1.6   | 0.504 | 0.215 |
| 14 | 170 | 25.7 | 1.242 | 359.8 | 4.2 | 55.6   | 27.0  | 29.6   | 5.2   | 13.7   | 3.6   | 0.683 | 0.666 |
| 14 | 170 | 26.2 | 1.220 | 389.9 | 4.5 | 123.1  | 68.0  | 69.8   | 8.9   | 38.8   | 6.0   | 1.025 | 1.028 |
| 14 | 170 | 26.9 | 1.184 | 419.8 | 4.9 | 152.4  | 96.7  | 181.5  | 24.4  | 110.0  | 20.1  | 0.922 | 0.891 |
| 14 | 170 | 27.5 | 1.160 | 450.0 | 5.2 | 237.4  | 182.0 | 274.3  | 39.1  | 223.5  | 22.9  | 0.820 | 0.974 |
| 14 | 272 | 39.9 | 1.279 | 329.8 | 4.6 | 36.8   | 18.4  | 17.6   | 2.2   | 7.7    | 1.4   | 0.701 | 0.571 |
| 14 | 272 | 41.4 | 1.234 | 359.8 | 5.0 | 119.7  | 70.5  | 68.9   | 8.0   | 39.5   | 9.0   | 0.844 | 0.949 |
| 14 | 272 | 42.1 | 1.212 | 389.9 | 5.4 | 228.4  | 158.7 | 134.2  | 17.1  | 95.9   | 19.0  | 0.941 | 1.030 |
| 14 | 272 | 43.0 | 1.189 | 419.8 | 5.8 | 214.1  | 152.3 | 248.9  | 28.3  | 183.0  | 17.4  | 0.903 | 0.874 |
| 14 | 272 | 44.1 | 1.158 | 449.8 | 6.2 | 367.6  | 293.6 | 436.2  | 48.4  | 345.1  | 52.8  | 0.944 | 0.922 |
| 14 | 374 | 55.4 | 1.267 | 329.8 | 5.0 | 57.3   | 35.1  | 29.4   | 2.9   | 18.4   | 3.4   | 0.883 | 1.005 |
| 14 | 374 | 57.1 | 1.230 | 359.8 | 5.5 | 161.1  | 108.4 | 91.8   | 8.8   | 62.2   | 9.8   | 0.851 | 0.898 |
| 14 | 374 | 58.2 | 1.207 | 389.9 | 5.9 | 331.2  | 244.0 | 204.4  | 37.8  | 153.9  | 37.7  | 1.021 | 1.086 |
| 14 | 374 | 59.3 | 1.185 | 419.8 | 6.4 | 507.8  | 409.8 | 304.8  | 23.9  | 252.8  | 29.5  | 0.855 | 0.899 |
| 14 | 374 | 61.1 | 1.150 | 449.9 | 6.8 | 845.2  | 704.5 | 517.7  | 35.5  | 427.7  | 51.0  | 0.894 | 0.965 |
| 14 | 476 | 70.6 | 1.265 | 329.9 | 5.3 | 68.9   | 40.6  | 36.9   | 4.7   | 21.4   | 3.7   | 0.671 | 0.576 |
| 14 | 476 | 72.4 | 1.235 | 359.8 | 5.8 | 178.4  | 125.7 | 108.0  | 19.4  | 78.9   | 19.7  | 0.924 | 1.004 |

|    |     |      |       |       |     |       |       |       |      |       |       |       |       |
|----|-----|------|-------|-------|-----|-------|-------|-------|------|-------|-------|-------|-------|
| 14 | 476 | 73.7 | 1.212 | 389.8 | 6.3 | 321.6 | 243.7 | 190.2 | 26.6 | 145.4 | 28.9  | 0.901 | 0.993 |
| 14 | 476 | 76.1 | 1.174 | 419.8 | 6.8 | 616.5 | 506.2 | 366.5 | 29.1 | 304.8 | 34.4  | 1.118 | 1.220 |
| 14 | 476 | 77.9 | 1.148 | 449.8 | 7.3 | 994.0 | 876.2 | 625.9 | 87.5 | 563.3 | 106.9 | 0.966 | 0.940 |
| 15 | 111 | 24.8 | 1.089 | 409.8 | 4.8 | 26.4  | 15.9  | 10.1  | 3.1  | 6.5   | 2.5   | 0.541 | 0.895 |
| 15 | 111 | 25.9 | 1.044 | 439.9 | 5.2 | 65.1  | 51.6  | 29.6  | 5.4  | 28.6  | 7.2   | 0.799 | 0.792 |
| 15 | 111 | 26.1 | 1.034 | 469.8 | 5.5 | 70.8  | 56.9  | 69.3  | 17.4 | 58.6  | 14.2  | 0.655 | 0.716 |
| 15 | 111 | 26.9 | 1.006 | 499.7 | 5.9 | 138.5 | 120.3 | 154.5 | 48.8 | 154.2 | 35.7  | 0.845 | 1.060 |
| 15 | 177 | 40.6 | 1.061 | 409.9 | 5.7 | 61.4  | 45.9  | 28.5  | 7.3  | 23.7  | 7.8   | 0.756 | 1.103 |
| 15 | 177 | 41.1 | 1.049 | 439.8 | 6.1 | 106.2 | 89.3  | 55.6  | 11.0 | 51.6  | 11.1  | 0.748 | 0.870 |
| 15 | 177 | 42.3 | 1.019 | 469.7 | 6.5 | 217.9 | 207.1 | 119.9 | 18.3 | 123.3 | 25.6  | 0.892 | 1.032 |
| 15 | 177 | 43.2 | 0.997 | 499.8 | 6.9 | 361.5 | 385.9 | 208.2 | 41.5 | 240.3 | 41.3  | 0.831 | 0.797 |
| 15 | 243 | 56.0 | 1.056 | 409.8 | 6.2 | 78.9  | 61.9  | 38.4  | 5.5  | 32.9  | 4.6   | 0.567 | 0.649 |
| 15 | 243 | 57.1 | 1.036 | 439.8 | 6.7 | 154.8 | 138.8 | 81.1  | 9.3  | 81.0  | 10.9  | 0.762 | 0.862 |
| 15 | 243 | 58.9 | 1.004 | 469.8 | 7.2 | 315.1 | 328.1 | 173.6 | 30.8 | 197.6 | 32.9  | 0.943 | 1.126 |
| 15 | 243 | 59.8 | 0.989 | 499.8 | 7.6 | 460.1 | 491.8 | 268.4 | 25.3 | 298.4 | 27.1  | 0.860 | 0.955 |
| 15 | 309 | 71.1 | 1.058 | 409.8 | 6.6 | 99.4  | 81.1  | 49.7  | 8.2  | 43.7  | 7.0   | 0.570 | 0.716 |
| 15 | 309 | 72.3 | 1.039 | 439.8 | 7.1 | 169.5 | 154.1 | 90.3  | 13.0 | 89.1  | 12.9  | 0.899 | 1.033 |
| 15 | 309 | 73.9 | 1.017 | 469.7 | 7.6 | 321.6 | 324.0 | 172.4 | 25.3 | 184.0 | 24.7  | 1.030 | 1.172 |
| 15 | 309 | 76.1 | 0.988 | 499.8 | 8.1 | 492.2 | 545.8 | 292.3 | 57.1 | 336.9 | 45.0  | 0.889 | 1.101 |
| 16 | 100 | 24.5 | 1.067 | 409.8 | 4.8 | 21.2  | 12.2  | 8.1   | 2.9  | 3.8   | 2.3   | 0.425 | 0.204 |
| 16 | 100 | 25.5 | 1.028 | 439.7 | 5.2 | 47.5  | 36.7  | 20.7  | 4.2  | 18.0  | 4.7   | 0.568 | 0.855 |
| 16 | 100 | 26.5 | 0.990 | 469.8 | 5.5 | 81.1  | 71.8  | 36.3  | 7.3  | 37.2  | 10.7  | 0.311 | 0.767 |
| 16 | 100 | 27.1 | 0.966 | 499.7 | 5.9 | 78.3  | 70.0  | 72.9  | 11.6 | 79.6  | 19.1  | 0.622 | 0.903 |
| 16 | 160 | 40.6 | 1.032 | 409.8 | 5.7 | 42.7  | 28.1  | 17.3  | 5.2  | 13.4  | 5.9   | 0.409 | 0.928 |
| 16 | 160 | 41.4 | 1.013 | 439.8 | 6.1 | 85.1  | 71.9  | 37.0  | 12.2 | 37.5  | 10.3  | 0.921 | 1.075 |
| 16 | 160 | 42.4 | 0.989 | 469.8 | 6.5 | 143.8 | 141.1 | 68.8  | 13.1 | 73.3  | 20.6  | 0.732 | 1.114 |
| 16 | 160 | 43.1 | 0.972 | 499.7 | 7.0 | 144.8 | 142.7 | 140.2 | 19.9 | 160.8 | 43.7  | 0.632 | 0.790 |
| 16 | 220 | 55.5 | 1.038 | 409.8 | 6.3 | 59.6  | 45.1  | 26.2  | 5.3  | 23.7  | 3.4   | 0.528 | 0.753 |
| 16 | 220 | 57.2 | 1.007 | 439.8 | 6.7 | 115.0 | 104.9 | 57.2  | 17.5 | 57.9  | 14.5  | 0.482 | 0.745 |
| 16 | 220 | 59.0 | 0.976 | 469.9 | 7.2 | 215.5 | 216.9 | 113.9 | 20.6 | 126.8 | 17.9  | 0.771 | 0.820 |
| 16 | 220 | 60.5 | 0.953 | 499.8 | 7.6 | 193.0 | 197.5 | 202.6 | 32.6 | 232.5 | 36.2  | 0.879 | 0.986 |
| 17 | 89  | 24.5 | 1.018 | 439.7 | 5.1 | 32.4  | 20.3  | 12.8  | 3.9  | 8.2   | 4.4   | 0.483 | 0.700 |
| 17 | 89  | 25.7 | 0.971 | 469.8 | 5.5 | 66.6  | 62.8  | 27.0  | 3.7  | 31.6  | 7.9   | 0.489 | 0.738 |
| 17 | 89  | 26.2 | 0.951 | 499.7 | 5.8 | 96.2  | 110.0 | 45.5  | 18.3 | 65.7  | 22.6  | 0.516 | 0.759 |
| 17 | 142 | 40.0 | 0.995 | 439.8 | 6.1 | 69.1  | 58.9  | 31.7  | 11.9 | 32.7  | 10.8  | 0.692 | 0.763 |
| 17 | 142 | 41.0 | 0.970 | 469.8 | 6.5 | 118.1 | 122.9 | 56.4  | 9.9  | 69.8  | 15.9  | 0.643 | 0.680 |
| 17 | 142 | 42.4 | 0.938 | 499.8 | 6.9 | 225.1 | 240.3 | 116.6 | 28.6 | 139.4 | 26.5  | 0.638 | 0.717 |
| 17 | 196 | 54.9 | 1.002 | 439.8 | 6.7 | 94.4  | 78.9  | 42.6  | 8.0  | 44.3  | 10.4  | 0.660 | 0.729 |
| 17 | 196 | 57.6 | 0.954 | 469.8 | 7.2 | 190.5 | 209.4 | 101.6 | 47.0 | 127.1 | 41.9  | 0.682 | 0.803 |
| 17 | 196 | 58.1 | 0.946 | 499.8 | 7.6 | 261.0 | 301.2 | 132.9 | 25.1 | 172.6 | 29.5  | 0.848 | 1.037 |
| 17 | 249 | 70.4 | 0.991 | 439.8 | 7.1 | 105.4 | 95.2  | 48.9  | 10.7 | 50.4  | 13.4  | 0.656 | 0.980 |
| 17 | 249 | 73.0 | 0.956 | 469.8 | 7.6 | 205.5 | 216.7 | 109.4 | 28.8 | 124.4 | 31.9  | 0.778 | 1.036 |

|    |     |      |       |       |     |       |        |        |       |        |       |       |       |
|----|-----|------|-------|-------|-----|-------|--------|--------|-------|--------|-------|-------|-------|
| 17 | 249 | 74.8 | 0.934 | 499.8 | 8.1 | 310.0 | 358.9  | 161.9  | 41.5  | 206.6  | 49.2  | 0.730 | 0.821 |
| 18 | 142 | 25.0 | 0.913 | 349.8 | 4.2 | 35.8  | 41.7   | 16.2   | 3.5   | 23.0   | 4.1   | 0.640 | 0.674 |
| 18 | 142 | 25.6 | 0.890 | 379.8 | 4.6 | 87.6  | 124.0  | 46.6   | 7.0   | 72.6   | 13.2  | 0.887 | 1.033 |
| 18 | 142 | 26.4 | 0.865 | 409.8 | 4.9 | 210.5 | 309.6  | 125.1  | 20.7  | 191.0  | 24.7  | 0.836 | 0.846 |
| 18 | 142 | 27.0 | 0.845 | 439.8 | 5.3 | 206.2 | 297.1  | 229.2  | 36.9  | 354.2  | 49.3  | 0.846 | 0.998 |
| 18 | 142 | 27.3 | 0.835 | 469.7 | 5.7 | 311.1 | 434.8  | 372.2  | 67.5  | 545.2  | 68.3  | 1.067 | 1.054 |
| 18 | 142 | 28.1 | 0.814 | 499.7 | 6.0 | 470.5 | 729.4  | 582.4  | 89.6  | 917.3  | 74.7  | 0.985 | 1.046 |
| 18 | 228 | 40.6 | 0.903 | 349.8 | 5.0 | 91.6  | 114.4  | 48.9   | 8.3   | 68.6   | 10.0  | 0.892 | 0.964 |
| 18 | 228 | 41.4 | 0.886 | 379.9 | 5.4 | 186.8 | 252.6  | 109.8  | 18.8  | 153.7  | 26.2  | 1.014 | 1.168 |
| 18 | 228 | 42.2 | 0.869 | 409.8 | 5.8 | 300.6 | 439.4  | 173.9  | 20.6  | 263.6  | 43.8  | 0.904 | 0.952 |
| 18 | 228 | 43.0 | 0.852 | 439.8 | 6.3 | 280.1 | 384.4  | 333.1  | 41.0  | 456.6  | 49.4  | 0.952 | 0.953 |
| 18 | 228 | 44.6 | 0.821 | 469.8 | 6.7 | 535.9 | 737.4  | 661.2  | 121.6 | 917.6  | 163.8 | 1.077 | 1.066 |
| 18 | 228 | 45.3 | 0.809 | 499.7 | 7.1 | 698.9 | 953.3  | 856.0  | 110.3 | 1182.9 | 125.7 | 1.004 | 1.006 |
| 18 | 313 | 55.8 | 0.902 | 349.9 | 5.4 | 118.6 | 153.3  | 66.7   | 8.4   | 93.9   | 14.3  | 0.912 | 1.020 |
| 18 | 313 | 56.8 | 0.886 | 379.8 | 5.9 | 231.5 | 304.3  | 130.2  | 23.9  | 178.9  | 28.3  | 1.100 | 1.082 |
| 18 | 313 | 57.9 | 0.869 | 409.8 | 6.4 | 415.4 | 544.5  | 258.4  | 70.5  | 339.0  | 73.8  | 0.949 | 0.950 |
| 18 | 313 | 59.4 | 0.847 | 439.8 | 6.8 | 352.6 | 495.0  | 440.7  | 38.3  | 623.3  | 61.5  | 0.989 | 0.957 |
| 18 | 313 | 61.3 | 0.820 | 469.8 | 7.3 | 553.0 | 818.6  | 680.0  | 94.1  | 1029.9 | 52.5  | 0.959 | 1.033 |
| 18 | 313 | 62.3 | 0.808 | 499.8 | 7.8 | 777.3 | 1128.1 | 958.6  | 208.3 | 1417.3 | 155.8 | 0.983 | 1.005 |
| 18 | 398 | 71.3 | 0.898 | 349.9 | 5.8 | 148.3 | 189.7  | 84.1   | 9.9   | 115.2  | 17.4  | 0.850 | 1.029 |
| 18 | 398 | 72.4 | 0.884 | 379.8 | 6.2 | 268.2 | 355.4  | 153.0  | 24.3  | 213.1  | 25.6  | 0.937 | 1.000 |
| 18 | 398 | 74.2 | 0.862 | 409.8 | 6.7 | 526.9 | 711.3  | 325.3  | 74.6  | 435.8  | 53.1  | 1.011 | 1.048 |
| 18 | 398 | 76.1 | 0.840 | 439.8 | 7.2 | 426.4 | 571.8  | 503.0  | 83.2  | 676.9  | 95.8  | 0.986 | 0.973 |
| 18 | 398 | 77.1 | 0.829 | 469.8 | 7.7 | 578.5 | 810.3  | 696.7  | 175.0 | 1019.1 | 212.2 | 0.908 | 0.947 |
| 18 | 398 | 79.2 | 0.808 | 499.8 | 8.2 | 791.1 | 1118.4 | 961.8  | 140.8 | 1395.6 | 140.2 | 0.884 | 0.951 |
| 19 | 159 | 24.9 | 0.975 | 349.9 | 4.2 | 36.6  | 45.5   | 14.2   | 9.8   | 24.6   | 11.9  | 0.489 | 0.579 |
| 19 | 159 | 25.8 | 0.942 | 379.8 | 4.6 | 137.7 | 196.3  | 76.8   | 21.3  | 118.1  | 27.4  | 0.747 | 0.898 |
| 19 | 159 | 26.0 | 0.934 | 409.8 | 4.9 | 217.5 | 345.0  | 127.4  | 18.6  | 212.2  | 28.9  | 0.858 | 0.958 |
| 19 | 159 | 26.9 | 0.903 | 439.8 | 5.3 | 251.7 | 367.7  | 292.6  | 38.1  | 452.0  | 65.9  | 0.924 | 1.001 |
| 19 | 159 | 27.4 | 0.887 | 469.7 | 5.6 | 349.7 | 526.4  | 421.3  | 82.1  | 637.5  | 68.6  | 0.991 | 1.012 |
| 19 | 159 | 28.1 | 0.865 | 499.8 | 6.0 | 545.8 | 795.3  | 692.0  | 73.7  | 995.9  | 128.5 | 1.059 | 1.002 |
| 19 | 255 | 40.2 | 0.970 | 349.9 | 5.0 | 114.9 | 155.8  | 64.7   | 9.7   | 94.9   | 19.2  | 0.916 | 1.084 |
| 19 | 255 | 41.0 | 0.951 | 379.8 | 5.4 | 227.4 | 314.4  | 132.6  | 17.3  | 191.9  | 19.5  | 1.027 | 1.026 |
| 19 | 255 | 41.7 | 0.934 | 409.8 | 5.8 | 373.9 | 529.2  | 225.9  | 39.7  | 329.4  | 46.2  | 0.955 | 1.053 |
| 19 | 255 | 43.4 | 0.898 | 439.8 | 6.2 | 380.2 | 531.8  | 448.9  | 88.4  | 637.6  | 83.5  | 0.944 | 0.969 |
| 19 | 255 | 44.1 | 0.883 | 469.8 | 6.7 | 521.5 | 754.2  | 648.3  | 89.0  | 968.3  | 132.1 | 1.013 | 1.026 |
| 19 | 255 | 45.9 | 0.849 | 499.7 | 7.1 | 847.3 | 1213.2 | 1051.6 | 181.7 | 1514.4 | 186.1 | 0.927 | 0.950 |
| 19 | 351 | 55.6 | 0.964 | 349.9 | 5.4 | 167.2 | 211.6  | 95.5   | 11.3  | 125.8  | 11.1  | 0.826 | 0.979 |
| 19 | 351 | 56.8 | 0.944 | 379.9 | 5.9 | 317.4 | 429.1  | 187.5  | 31.6  | 258.9  | 24.9  | 0.947 | 1.012 |
| 19 | 351 | 58.5 | 0.917 | 409.8 | 6.4 | 566.9 | 801.6  | 340.1  | 41.4  | 487.5  | 65.0  | 1.056 | 1.035 |
| 19 | 351 | 59.0 | 0.909 | 439.8 | 6.8 | 417.9 | 574.5  | 516.1  | 114.5 | 708.4  | 65.8  | 1.059 | 1.007 |
| 19 | 351 | 61.0 | 0.879 | 469.8 | 7.3 | 681.3 | 889.5  | 874.0  | 164.7 | 1107.1 | 123.4 | 1.012 | 0.988 |



|    |     |      |       |       |     |       |        |        |       |        |       |       |       |
|----|-----|------|-------|-------|-----|-------|--------|--------|-------|--------|-------|-------|-------|
| 19 | 351 | 62.0 | 0.864 | 499.8 | 7.8 | 897.2 | 1215.1 | 1122.1 | 248.7 | 1566.9 | 198.5 | 1.025 | 1.016 |
| 19 | 446 | 70.8 | 0.963 | 349.8 | 5.7 | 200.1 | 250.5  | 118.5  | 18.9  | 154.1  | 22.0  | 0.867 | 0.874 |
| 19 | 446 | 72.0 | 0.946 | 379.8 | 6.2 | 409.2 | 514.1  | 256.0  | 80.5  | 325.0  | 81.2  | 0.960 | 0.977 |
| 19 | 446 | 73.6 | 0.925 | 409.8 | 6.7 | 634.0 | 828.9  | 397.7  | 74.3  | 525.7  | 79.3  | 0.765 | 0.763 |
| 19 | 446 | 75.8 | 0.899 | 439.8 | 7.2 | 477.2 | 650.9  | 555.6  | 34.5  | 775.9  | 98.2  | 0.845 | 0.880 |
| 19 | 446 | 77.1 | 0.884 | 469.8 | 7.7 | 688.3 | 935.1  | 848.7  | 161.2 | 1171.5 | 174.4 | 0.901 | 0.936 |
| 19 | 446 | 79.4 | 0.859 | 499.8 | 8.2 | 996.4 | 1366.9 | 1224.7 | 243.0 | 1719.0 | 221.9 | 0.982 | 1.029 |
| 20 | 136 | 25.1 | 1.230 | 349.9 | 4.2 | 65.3  | 70.6   | 32.4   | 4.0   | 40.2   | 6.3   | 0.732 | 1.038 |
| 20 | 136 | 25.7 | 1.203 | 379.8 | 4.6 | 125.6 | 167.7  | 68.5   | 8.9   | 99.8   | 14.8  | 0.761 | 0.896 |
| 20 | 136 | 26.3 | 1.172 | 409.8 | 4.9 | 252.1 | 364.1  | 138.8  | 15.2  | 219.3  | 22.1  | 1.004 | 1.033 |
| 20 | 136 | 27.0 | 1.143 | 439.7 | 5.3 | 225.3 | 333.4  | 252.5  | 41.8  | 409.5  | 54.9  | 0.787 | 1.000 |
| 20 | 136 | 27.7 | 1.115 | 469.8 | 5.7 | 386.3 | 551.3  | 446.6  | 83.7  | 665.4  | 104.4 | 0.901 | 0.998 |
| 20 | 136 | 28.3 | 1.089 | 499.7 | 6.0 | 546.5 | 819.9  | 658.1  | 126.2 | 1038.9 | 87.1  | 0.941 | 1.079 |
| 20 | 217 | 40.4 | 1.218 | 349.9 | 5.0 | 125.3 | 146.9  | 67.3   | 4.7   | 86.0   | 8.6   | 0.933 | 0.925 |
| 20 | 217 | 41.3 | 1.191 | 379.8 | 5.4 | 237.7 | 327.1  | 132.7  | 16.3  | 199.3  | 18.6  | 0.946 | 1.062 |
| 20 | 217 | 41.9 | 1.175 | 409.8 | 5.8 | 366.1 | 493.0  | 211.5  | 39.9  | 300.5  | 40.5  | 0.950 | 0.812 |
| 20 | 217 | 43.3 | 1.137 | 439.8 | 6.3 | 328.9 | 475.2  | 386.8  | 69.9  | 585.4  | 94.7  | 0.835 | 0.978 |
| 20 | 217 | 44.3 | 1.111 | 469.8 | 6.7 | 522.3 | 726.0  | 654.1  | 154.3 | 911.3  | 132.9 | 0.880 | 0.908 |
| 20 | 217 | 45.4 | 1.085 | 499.8 | 7.1 | 802.6 | 1061.4 | 993.6  | 105.2 | 1249.8 | 131.8 | 0.971 | 0.911 |
| 20 | 299 | 56.0 | 1.212 | 349.9 | 5.4 | 167.4 | 218.0  | 94.2   | 12.0  | 134.0  | 20.2  | 0.868 | 0.956 |
| 20 | 299 | 57.1 | 1.188 | 379.8 | 5.9 | 297.0 | 412.2  | 183.6  | 59.0  | 264.5  | 45.8  | 0.911 | 0.914 |
| 20 | 299 | 57.8 | 1.173 | 409.8 | 6.4 | 450.0 | 627.4  | 267.9  | 57.1  | 387.4  | 51.4  | 0.875 | 1.014 |
| 20 | 299 | 59.8 | 1.133 | 439.8 | 6.8 | 415.9 | 586.8  | 505.3  | 59.8  | 719.6  | 65.2  | 0.904 | 0.979 |
| 20 | 299 | 60.9 | 1.113 | 469.8 | 7.3 | 592.6 | 816.8  | 682.3  | 90.9  | 983.1  | 49.3  | 1.013 | 0.981 |
| 20 | 299 | 62.4 | 1.087 | 499.8 | 7.8 | 817.5 | 1161.4 | 926.3  | 128.6 | 1374.4 | 107.8 | 0.925 | 0.970 |
| 20 | 380 | 70.4 | 1.224 | 349.8 | 5.8 | 166.6 | 205.2  | 97.3   | 27.0  | 125.5  | 25.3  | 0.877 | 1.026 |
| 20 | 380 | 72.1 | 1.196 | 379.8 | 6.3 | 305.4 | 404.2  | 178.3  | 21.8  | 244.8  | 24.8  | 1.013 | 1.119 |
| 20 | 380 | 73.5 | 1.173 | 409.8 | 6.7 | 531.0 | 707.1  | 327.6  | 39.7  | 442.0  | 46.5  | 1.055 | 1.043 |
| 20 | 380 | 75.7 | 1.138 | 439.8 | 7.2 | 416.6 | 585.6  | 473.4  | 62.2  | 710.2  | 88.3  | 0.802 | 0.912 |
| 20 | 380 | 77.7 | 1.110 | 469.8 | 7.7 | 694.2 | 925.9  | 908.0  | 188.8 | 1212.9 | 172.5 | 1.104 | 1.078 |
| 20 | 380 | 79.4 | 1.085 | 499.8 | 8.2 | 911.5 | 1282.1 | 1084.2 | 174.6 | 1580.0 | 163.3 | 0.939 | 1.044 |
| 21 | 171 | 18.9 | 1.073 | 349.8 | 3.7 | 65.1  | 44.2   | 35.2   | 3.9   | 23.4   | 3.5   | 0.743 | 0.713 |
| 21 | 171 | 19.3 | 1.051 | 379.8 | 4.0 | 154.4 | 122.6  | 84.5   | 8.8   | 72.1   | 10.0  | 0.885 | 0.857 |
| 21 | 171 | 19.5 | 1.039 | 409.7 | 4.4 | 271.2 | 215.9  | 163.7  | 16.1  | 129.0  | 19.9  | 0.887 | 0.910 |
| 21 | 171 | 20.2 | 1.004 | 439.7 | 4.7 | 320.4 | 247.4  | 396.8  | 50.2  | 308.8  | 36.8  | 0.983 | 0.995 |
| 21 | 171 | 20.4 | 0.993 | 469.7 | 5.0 | 428.1 | 382.8  | 540.3  | 65.5  | 486.3  | 39.4  | 1.094 | 1.039 |
| 21 | 171 | 20.7 | 0.976 | 499.7 | 5.3 | 585.5 | 523.6  | 717.1  | 76.3  | 636.1  | 91.5  | 0.937 | 0.936 |
| 21 | 274 | 30.0 | 1.081 | 349.8 | 4.5 | 111.2 | 89.6   | 63.3   | 7.8   | 51.8   | 6.5   | 0.807 | 1.059 |
| 21 | 274 | 30.9 | 1.050 | 379.9 | 4.9 | 273.1 | 217.6  | 164.8  | 14.5  | 133.0  | 8.6   | 1.028 | 0.953 |
| 21 | 274 | 31.5 | 1.031 | 409.8 | 5.3 | 463.0 | 408.6  | 281.4  | 17.5  | 249.4  | 19.8  | 0.825 | 0.942 |
| 21 | 274 | 32.2 | 1.006 | 439.7 | 5.7 | 412.5 | 354.7  | 492.5  | 57.8  | 432.0  | 41.4  | 0.905 | 0.976 |
| 21 | 274 | 32.7 | 0.993 | 469.8 | 6.1 | 562.1 | 495.4  | 679.8  | 74.7  | 612.4  | 98.9  | 0.965 | 0.988 |

|    |     |      |       |       |     |        |       |        |       |        |       |       |       |
|----|-----|------|-------|-------|-----|--------|-------|--------|-------|--------|-------|-------|-------|
| 21 | 274 | 33.6 | 0.965 | 499.8 | 6.4 | 852.3  | 800.6 | 1026.8 | 130.2 | 995.8  | 119.8 | 0.955 | 1.019 |
| 21 | 377 | 41.3 | 1.080 | 349.9 | 5.0 | 154.0  | 134.3 | 89.6   | 5.9   | 79.7   | 6.0   | 0.876 | 0.931 |
| 21 | 377 | 42.6 | 1.047 | 379.9 | 5.4 | 350.2  | 315.8 | 212.9  | 21.9  | 194.0  | 24.1  | 0.918 | 0.989 |
| 21 | 377 | 43.3 | 1.030 | 409.8 | 5.9 | 583.0  | 502.7 | 356.3  | 26.9  | 311.1  | 25.5  | 1.019 | 1.023 |
| 21 | 377 | 44.5 | 1.002 | 439.8 | 6.3 | 492.8  | 436.9 | 584.0  | 49.1  | 515.9  | 48.8  | 0.883 | 0.879 |
| 21 | 377 | 44.9 | 0.995 | 469.8 | 6.7 | 641.2  | 584.0 | 775.4  | 82.0  | 720.0  | 94.9  | 0.988 | 0.976 |
| 21 | 377 | 46.1 | 0.968 | 499.8 | 7.2 | 936.7  | 897.3 | 1160.9 | 170.1 | 1153.4 | 97.3  | 0.997 | 1.082 |
| 21 | 480 | 52.8 | 1.077 | 349.8 | 5.4 | 188.1  | 152.7 | 112.6  | 8.2   | 92.5   | 8.7   | 0.941 | 0.884 |
| 21 | 480 | 53.6 | 1.059 | 379.8 | 5.8 | 320.6  | 279.2 | 192.2  | 14.0  | 168.5  | 17.7  | 0.867 | 0.936 |
| 21 | 480 | 55.3 | 1.027 | 409.8 | 6.3 | 663.3  | 621.5 | 402.9  | 23.6  | 375.5  | 33.9  | 0.947 | 1.013 |
| 21 | 480 | 56.3 | 1.010 | 439.8 | 6.8 | 509.2  | 435.4 | 606.3  | 60.2  | 516.1  | 74.9  | 0.970 | 0.906 |
| 21 | 480 | 57.6 | 0.986 | 469.8 | 7.2 | 781.8  | 738.9 | 978.6  | 120.2 | 919.9  | 94.6  | 1.020 | 1.006 |
| 21 | 480 | 58.5 | 0.971 | 499.8 | 7.7 | 1035.9 | 971.9 | 1317.5 | 203.5 | 1210.0 | 223.7 | 1.038 | 1.023 |
| 22 | 188 | 25.1 | 1.026 | 349.8 | 4.2 | 54.9   | 38.1  | 29.7   | 5.4   | 20.0   | 5.1   | 0.642 | 0.704 |
| 22 | 188 | 25.4 | 1.012 | 379.8 | 4.6 | 105.7  | 80.6  | 58.2   | 7.1   | 47.0   | 5.7   | 0.805 | 0.781 |
| 22 | 188 | 26.2 | 0.984 | 409.8 | 5.0 | 264.0  | 225.9 | 160.1  | 22.7  | 134.9  | 20.8  | 0.910 | 1.025 |
| 22 | 188 | 26.7 | 0.966 | 439.8 | 5.3 | 241.7  | 214.9 | 288.9  | 25.9  | 252.9  | 44.7  | 0.952 | 0.918 |
| 22 | 188 | 27.0 | 0.954 | 469.8 | 5.7 | 337.7  | 316.0 | 396.8  | 67.1  | 378.4  | 48.7  | 0.898 | 0.928 |
| 22 | 188 | 28.1 | 0.917 | 499.8 | 6.0 | 598.0  | 604.4 | 708.6  | 112.5 | 741.8  | 51.0  | 0.928 | 0.932 |
| 22 | 301 | 40.1 | 1.027 | 349.9 | 5.0 | 89.5   | 69.2  | 49.6   | 3.4   | 39.8   | 5.6   | 0.878 | 0.956 |
| 22 | 301 | 41.0 | 1.004 | 379.8 | 5.4 | 193.5  | 171.2 | 111.9  | 9.2   | 101.5  | 8.7   | 0.926 | 0.952 |
| 22 | 301 | 41.9 | 0.983 | 409.8 | 5.8 | 374.8  | 364.0 | 227.1  | 34.5  | 225.0  | 22.4  | 0.828 | 0.861 |
| 22 | 301 | 42.8 | 0.964 | 439.8 | 6.3 | 327.2  | 308.1 | 384.2  | 42.3  | 368.7  | 34.7  | 0.928 | 1.006 |
| 22 | 301 | 44.0 | 0.938 | 469.8 | 6.7 | 541.1  | 520.3 | 659.9  | 65.4  | 637.9  | 85.4  | 0.858 | 0.933 |
| 22 | 301 | 44.9 | 0.919 | 499.8 | 7.1 | 745.0  | 759.2 | 890.7  | 63.5  | 915.0  | 94.0  | 0.985 | 0.986 |
| 22 | 414 | 55.2 | 1.027 | 349.8 | 5.5 | 104.4  | 87.2  | 58.2   | 5.5   | 49.9   | 6.1   | 0.828 | 0.903 |
| 22 | 414 | 56.6 | 1.002 | 379.8 | 5.9 | 252.8  | 235.4 | 148.4  | 16.1  | 142.1  | 18.3  | 0.978 | 0.968 |
| 22 | 414 | 58.0 | 0.978 | 409.8 | 6.4 | 479.6  | 445.8 | 292.4  | 29.4  | 269.7  | 18.2  | 1.026 | 1.033 |
| 22 | 414 | 59.1 | 0.960 | 439.8 | 6.9 | 393.3  | 377.0 | 488.1  | 42.6  | 463.5  | 53.6  | 1.025 | 1.036 |
| 22 | 414 | 60.2 | 0.942 | 469.8 | 7.3 | 597.8  | 580.0 | 745.9  | 79.1  | 730.2  | 108.0 | 1.070 | 1.060 |
| 22 | 414 | 61.9 | 0.916 | 499.8 | 7.8 | 858.7  | 857.3 | 1013.0 | 126.4 | 1030.2 | 90.9  | 0.934 | 0.976 |
| 22 | 528 | 70.9 | 1.020 | 349.8 | 5.8 | 136.1  | 114.1 | 76.4   | 5.6   | 67.1   | 6.4   | 0.962 | 1.003 |
| 22 | 528 | 72.6 | 0.996 | 379.9 | 6.3 | 311.9  | 286.7 | 191.2  | 28.9  | 180.4  | 30.8  | 0.813 | 0.870 |
| 22 | 528 | 73.9 | 0.979 | 409.8 | 6.8 | 553.6  | 529.5 | 338.4  | 42.7  | 330.3  | 47.1  | 1.012 | 0.982 |
| 22 | 528 | 75.2 | 0.962 | 439.8 | 7.3 | 442.3  | 426.0 | 562.3  | 106.7 | 550.4  | 111.0 | 0.961 | 0.962 |
| 22 | 528 | 77.2 | 0.937 | 469.7 | 7.7 | 686.2  | 679.9 | 844.3  | 200.2 | 851.1  | 195.4 | 0.992 | 1.021 |
| 22 | 528 | 79.4 | 0.911 | 499.8 | 8.2 | 979.1  | 984.5 | 1254.1 | 262.8 | 1249.3 | 264.0 | 0.981 | 0.976 |
| 23 | 185 | 25.2 | 1.022 | 349.8 | 4.4 | 19.2   | 14.3  | 8.8    | 2.2   | 6.0    | 1.9   | 0.465 | 0.569 |
| 23 | 185 | 25.8 | 0.995 | 379.8 | 4.8 | 54.4   | 46.0  | 29.4   | 3.7   | 25.8   | 4.5   | 0.741 | 0.805 |
| 23 | 185 | 25.9 | 0.992 | 409.8 | 5.2 | 90.2   | 89.8  | 50.6   | 6.3   | 53.4   | 8.4   | 0.752 | 0.915 |
| 23 | 185 | 26.9 | 0.954 | 439.8 | 5.6 | 125.6  | 133.7 | 138.8  | 25.1  | 152.5  | 17.3  | 0.832 | 0.958 |
| 23 | 185 | 27.2 | 0.945 | 469.8 | 6.0 | 202.2  | 214.0 | 238.8  | 27.1  | 262.3  | 45.7  | 0.978 | 1.020 |

|    |     |      |       |       |     |        |        |        |       |        |       |       |       |
|----|-----|------|-------|-------|-----|--------|--------|--------|-------|--------|-------|-------|-------|
| 23 | 185 | 27.7 | 0.929 | 499.7 | 6.3 | 292.3  | 360.9  | 349.1  | 32.7  | 449.7  | 40.2  | 0.975 | 0.978 |
| 23 | 295 | 40.4 | 1.015 | 349.9 | 5.2 | 40.4   | 34.5   | 20.1   | 2.7   | 18.5   | 3.2   | 0.879 | 0.865 |
| 23 | 295 | 40.9 | 1.002 | 379.8 | 5.6 | 84.9   | 78.8   | 46.2   | 8.6   | 46.8   | 7.5   | 0.890 | 0.860 |
| 23 | 295 | 42.0 | 0.977 | 409.8 | 6.1 | 206.1  | 216.5  | 120.9  | 18.7  | 132.6  | 17.2  | 0.963 | 0.962 |
| 23 | 295 | 42.7 | 0.960 | 439.8 | 6.5 | 185.0  | 199.2  | 214.5  | 22.1  | 241.4  | 30.7  | 0.938 | 1.059 |
| 23 | 295 | 43.3 | 0.947 | 469.8 | 7.0 | 273.8  | 313.1  | 328.4  | 29.2  | 395.7  | 29.9  | 0.961 | 1.040 |
| 23 | 295 | 45.4 | 0.904 | 499.7 | 7.4 | 565.6  | 632.4  | 677.9  | 60.6  | 752.0  | 53.8  | 0.964 | 0.955 |
| 23 | 406 | 55.5 | 1.017 | 349.9 | 5.6 | 50.4   | 44.6   | 26.7   | 4.8   | 24.9   | 4.9   | 0.834 | 0.942 |
| 23 | 406 | 56.6 | 0.997 | 379.8 | 6.1 | 117.9  | 119.4  | 67.2   | 6.3   | 70.7   | 10.3  | 0.898 | 1.007 |
| 23 | 406 | 57.9 | 0.975 | 409.8 | 6.6 | 246.6  | 259.2  | 147.4  | 20.4  | 160.4  | 20.2  | 0.978 | 0.991 |
| 23 | 406 | 59.1 | 0.955 | 439.8 | 7.1 | 234.9  | 253.9  | 269.4  | 34.7  | 299.9  | 53.8  | 0.902 | 0.973 |
| 23 | 406 | 60.0 | 0.939 | 469.8 | 7.5 | 343.6  | 391.0  | 394.2  | 55.8  | 467.3  | 50.7  | 0.925 | 1.016 |
| 23 | 406 | 61.7 | 0.914 | 499.7 | 8.0 | 585.2  | 679.8  | 737.1  | 86.4  | 862.8  | 115.7 | 1.026 | 1.042 |
| 23 | 517 | 70.8 | 1.015 | 349.8 | 5.9 | 57.5   | 51.3   | 30.0   | 4.2   | 28.5   | 4.6   | 0.707 | 0.767 |
| 23 | 517 | 72.3 | 0.994 | 379.8 | 6.4 | 136.2  | 142.1  | 79.5   | 15.3  | 87.8   | 17.2  | 0.783 | 0.886 |
| 23 | 517 | 74.1 | 0.969 | 409.8 | 6.9 | 328.3  | 343.3  | 205.2  | 46.9  | 220.9  | 42.9  | 0.939 | 0.985 |
| 23 | 517 | 75.7 | 0.949 | 439.8 | 7.4 | 270.7  | 289.4  | 320.7  | 41.9  | 344.7  | 25.9  | 0.896 | 0.922 |
| 23 | 517 | 76.7 | 0.936 | 469.8 | 8.0 | 394.7  | 436.7  | 473.0  | 49.7  | 524.5  | 48.3  | 0.956 | 0.915 |
| 23 | 517 | 78.3 | 0.917 | 499.8 | 8.5 | 621.3  | 720.7  | 760.3  | 108.9 | 886.3  | 104.6 | 0.940 | 0.983 |
| 24 | 127 | 25.0 | 0.893 | 349.9 | 4.1 | 81.3   | 137.2  | 43.1   | 8.5   | 82.0   | 15.1  | 0.795 | 0.974 |
| 24 | 127 | 25.3 | 0.884 | 379.9 | 4.5 | 132.4  | 226.2  | 70.1   | 14.5  | 135.9  | 17.0  | 0.783 | 0.980 |
| 24 | 127 | 26.1 | 0.856 | 409.8 | 4.9 | 314.0  | 549.9  | 179.9  | 23.2  | 327.0  | 43.9  | 0.946 | 1.091 |
| 24 | 127 | 26.6 | 0.840 | 439.8 | 5.2 | 255.6  | 434.3  | 288.8  | 47.8  | 515.1  | 64.3  | 0.901 | 0.914 |
| 24 | 127 | 27.1 | 0.825 | 469.9 | 5.6 | 393.0  | 626.4  | 473.0  | 74.6  | 795.0  | 111.7 | 1.009 | 1.072 |
| 24 | 127 | 27.9 | 0.802 | 499.8 | 5.9 | 600.4  | 968.4  | 713.4  | 142.2 | 1213.9 | 175.5 | 0.858 | 1.020 |
| 24 | 204 | 40.0 | 0.898 | 349.8 | 4.9 | 131.1  | 206.5  | 74.9   | 11.1  | 125.4  | 18.2  | 0.754 | 0.826 |
| 24 | 204 | 41.4 | 0.868 | 379.9 | 5.3 | 318.5  | 512.9  | 192.7  | 25.1  | 317.4  | 25.6  | 1.040 | 0.925 |
| 24 | 204 | 41.8 | 0.859 | 409.8 | 5.8 | 458.6  | 740.6  | 275.4  | 39.8  | 461.1  | 63.9  | 1.033 | 1.017 |
| 24 | 204 | 43.2 | 0.831 | 439.8 | 6.2 | 445.9  | 672.2  | 539.0  | 74.1  | 805.5  | 99.3  | 1.028 | 1.004 |
| 24 | 204 | 43.6 | 0.823 | 469.8 | 6.6 | 551.0  | 859.3  | 639.8  | 111.6 | 1044.7 | 190.6 | 0.907 | 0.954 |
| 24 | 204 | 44.9 | 0.800 | 499.7 | 7.0 | 771.1  | 1216.2 | 939.0  | 125.3 | 1501.3 | 145.5 | 0.917 | 0.972 |
| 24 | 280 | 55.1 | 0.894 | 349.8 | 5.4 | 186.3  | 284.3  | 108.0  | 11.0  | 178.2  | 16.2  | 0.916 | 0.947 |
| 24 | 280 | 56.6 | 0.870 | 379.8 | 5.8 | 370.7  | 582.8  | 227.1  | 47.4  | 375.6  | 55.7  | 0.937 | 0.926 |
| 24 | 280 | 57.7 | 0.853 | 409.8 | 6.3 | 648.0  | 992.4  | 398.5  | 63.2  | 609.5  | 85.7  | 0.812 | 0.950 |
| 24 | 280 | 59.5 | 0.828 | 439.8 | 6.8 | 516.0  | 802.0  | 615.5  | 63.3  | 1001.8 | 131.2 | 0.981 | 1.023 |
| 24 | 280 | 60.4 | 0.815 | 469.8 | 7.2 | 639.3  | 1040.4 | 770.5  | 148.7 | 1317.9 | 128.8 | 0.897 | 1.008 |
| 24 | 280 | 62.4 | 0.789 | 499.8 | 7.7 | 1056.0 | 1583.8 | 1289.4 | 301.0 | 1992.7 | 318.5 | 0.984 | 1.007 |
| 24 | 356 | 70.4 | 0.889 | 349.8 | 5.7 | 222.0  | 348.9  | 132.7  | 15.4  | 211.2  | 19.0  | 0.865 | 0.998 |
| 24 | 356 | 71.8 | 0.873 | 379.9 | 6.2 | 385.1  | 603.0  | 231.2  | 35.7  | 370.5  | 36.9  | 0.879 | 0.932 |
| 24 | 356 | 73.6 | 0.851 | 409.8 | 6.7 | 664.6  | 1027.6 | 402.5  | 43.6  | 646.2  | 50.7  | 0.962 | 1.007 |
| 24 | 356 | 75.5 | 0.829 | 439.8 | 7.2 | 570.9  | 864.0  | 695.3  | 139.9 | 1078.7 | 195.1 | 0.955 | 1.038 |
| 24 | 356 | 77.4 | 0.809 | 469.8 | 7.7 | 783.1  | 1170.7 | 973.9  | 206.5 | 1445.4 | 171.9 | 0.979 | 0.995 |

|    |     |      |       |       |     |        |        |        |       |        |       |       |       |
|----|-----|------|-------|-------|-----|--------|--------|--------|-------|--------|-------|-------|-------|
| 24 | 356 | 79.5 | 0.788 | 499.7 | 8.1 | 1074.8 | 1624.4 | 1330.7 | 259.7 | 1960.2 | 235.5 | 0.965 | 0.970 |
| 25 | 141 | 25.0 | 0.948 | 349.8 | 4.1 | 110.5  | 186.9  | 60.0   | 10.6  | 110.4  | 19.0  | 0.905 | 0.951 |
| 25 | 141 | 25.5 | 0.931 | 379.8 | 4.5 | 225.6  | 367.8  | 135.4  | 15.1  | 230.6  | 17.4  | 1.072 | 0.999 |
| 25 | 141 | 26.4 | 0.897 | 409.8 | 4.8 | 491.3  | 754.5  | 305.5  | 44.5  | 454.7  | 33.4  | 0.896 | 1.127 |
| 25 | 141 | 26.8 | 0.884 | 439.7 | 5.2 | 328.9  | 569.7  | 384.9  | 72.0  | 709.7  | 71.9  | 0.845 | 0.975 |
| 25 | 141 | 27.0 | 0.876 | 469.8 | 5.5 | 467.4  | 715.4  | 580.0  | 102.4 | 853.4  | 117.0 | 1.019 | 0.929 |
| 25 | 141 | 27.6 | 0.857 | 499.8 | 5.9 | 673.1  | 1018.8 | 848.6  | 109.7 | 1236.5 | 224.2 | 1.021 | 0.945 |
| 25 | 225 | 39.8 | 0.949 | 349.8 | 4.9 | 203.1  | 308.2  | 115.8  | 12.2  | 185.3  | 22.5  | 1.058 | 1.146 |
| 25 | 225 | 40.6 | 0.931 | 379.8 | 5.3 | 356.4  | 551.2  | 215.9  | 42.1  | 348.7  | 41.7  | 0.927 | 0.967 |
| 25 | 225 | 41.8 | 0.903 | 409.8 | 5.7 | 608.1  | 938.0  | 374.8  | 21.1  | 579.6  | 53.0  | 1.045 | 1.009 |
| 25 | 225 | 43.1 | 0.877 | 439.8 | 6.1 | 522.3  | 771.6  | 621.8  | 71.6  | 942.8  | 114.2 | 0.992 | 0.986 |
| 25 | 225 | 44.1 | 0.856 | 469.8 | 6.6 | 797.2  | 1101.2 | 973.3  | 97.1  | 1356.3 | 154.2 | 1.015 | 1.014 |
| 25 | 225 | 45.3 | 0.835 | 499.8 | 7.0 | 1061.0 | 1518.8 | 1277.8 | 106.2 | 1878.3 | 199.5 | 0.976 | 1.009 |
| 25 | 309 | 55.1 | 0.943 | 349.8 | 5.4 | 279.4  | 405.4  | 167.8  | 22.8  | 248.3  | 30.0  | 1.032 | 1.130 |
| 25 | 309 | 56.0 | 0.927 | 379.8 | 5.8 | 456.2  | 671.5  | 284.5  | 52.7  | 418.8  | 44.9  | 0.782 | 0.906 |
| 25 | 309 | 57.9 | 0.897 | 409.8 | 6.3 | 782.7  | 1178.9 | 460.3  | 57.9  | 731.8  | 76.3  | 1.084 | 0.974 |
| 25 | 309 | 59.2 | 0.877 | 439.8 | 6.7 | 643.5  | 923.5  | 835.7  | 192.6 | 1220.4 | 240.1 | 1.054 | 1.019 |
| 25 | 309 | 60.3 | 0.862 | 469.8 | 7.2 | 814.4  | 1185.4 | 999.8  | 150.3 | 1449.2 | 151.7 | 0.983 | 1.010 |
| 25 | 309 | 61.6 | 0.843 | 499.8 | 7.7 | 1074.3 | 1566.7 | 1380.8 | 220.4 | 2020.8 | 247.6 | 1.019 | 1.049 |
| 25 | 394 | 70.4 | 0.940 | 349.8 | 5.7 | 319.8  | 462.6  | 198.2  | 31.6  | 286.5  | 23.7  | 1.032 | 1.080 |
| 25 | 394 | 71.6 | 0.925 | 379.8 | 6.2 | 514.4  | 774.3  | 306.2  | 41.5  | 473.0  | 19.3  | 0.948 | 0.926 |
| 25 | 394 | 73.4 | 0.901 | 409.8 | 6.7 | 881.5  | 1235.8 | 534.1  | 52.9  | 752.3  | 61.6  | 1.100 | 1.072 |
| 25 | 394 | 75.1 | 0.882 | 439.8 | 7.1 | 645.9  | 949.2  | 800.0  | 97.1  | 1199.3 | 161.5 | 0.990 | 1.033 |
| 25 | 394 | 76.9 | 0.861 | 469.8 | 7.6 | 941.9  | 1301.8 | 1173.9 | 254.6 | 1647.1 | 298.7 | 1.045 | 1.047 |
| 25 | 394 | 79.2 | 0.836 | 499.8 | 8.1 | 1284.2 | 1760.3 | 1649.2 | 252.5 | 2259.8 | 296.7 | 1.035 | 1.027 |
| 26 | 122 | 25.1 | 1.177 | 349.8 | 4.2 | 117.3  | 172.0  | 63.5   | 12.2  | 101.3  | 17.3  | 0.801 | 1.064 |
| 26 | 122 | 25.7 | 1.150 | 379.8 | 4.5 | 238.8  | 386.2  | 140.3  | 24.6  | 240.0  | 26.8  | 0.875 | 1.053 |
| 26 | 122 | 26.1 | 1.129 | 409.8 | 4.9 | 403.5  | 620.7  | 243.7  | 35.3  | 379.0  | 57.2  | 0.959 | 0.991 |
| 26 | 122 | 26.7 | 1.107 | 439.8 | 5.2 | 317.4  | 450.4  | 378.4  | 66.3  | 558.5  | 108.4 | 0.951 | 1.002 |
| 26 | 122 | 27.6 | 1.068 | 469.8 | 5.6 | 524.9  | 792.4  | 655.3  | 95.0  | 985.7  | 178.7 | 1.026 | 0.973 |
| 26 | 122 | 28.6 | 1.031 | 499.8 | 5.9 | 807.0  | 1207.1 | 991.2  | 113.0 | 1488.1 | 207.6 | 1.019 | 0.934 |
| 26 | 195 | 40.2 | 1.173 | 349.8 | 4.9 | 198.6  | 298.7  | 112.9  | 13.2  | 183.4  | 24.6  | 0.945 | 0.956 |
| 26 | 195 | 41.1 | 1.147 | 379.8 | 5.3 | 349.9  | 538.5  | 196.9  | 20.6  | 330.9  | 48.8  | 1.006 | 1.047 |
| 26 | 195 | 42.1 | 1.122 | 409.8 | 5.8 | 606.9  | 917.5  | 374.7  | 63.2  | 562.3  | 58.4  | 0.854 | 1.016 |
| 26 | 195 | 43.4 | 1.089 | 439.8 | 6.2 | 487.0  | 716.8  | 585.4  | 109.5 | 867.6  | 112.3 | 0.998 | 0.986 |
| 26 | 195 | 44.3 | 1.065 | 469.7 | 6.6 | 719.8  | 1063.0 | 881.9  | 95.8  | 1299.1 | 123.1 | 0.975 | 0.968 |
| 26 | 195 | 45.7 | 1.032 | 499.7 | 7.0 | 1006.7 | 1490.2 | 1202.4 | 148.7 | 1788.9 | 178.0 | 0.939 | 0.985 |
| 26 | 268 | 55.4 | 1.170 | 349.8 | 5.4 | 237.4  | 350.3  | 129.4  | 14.4  | 207.2  | 23.3  | 0.953 | 1.047 |
| 26 | 268 | 56.5 | 1.148 | 379.8 | 5.8 | 428.7  | 619.9  | 254.6  | 37.9  | 381.7  | 46.1  | 1.038 | 0.956 |
| 26 | 268 | 57.7 | 1.125 | 409.8 | 6.3 | 671.6  | 974.5  | 410.6  | 77.7  | 603.0  | 84.5  | 1.013 | 0.978 |
| 26 | 268 | 59.1 | 1.098 | 439.8 | 6.8 | 521.9  | 778.8  | 675.9  | 173.6 | 996.1  | 207.1 | 1.017 | 1.068 |
| 26 | 268 | 60.2 | 1.077 | 469.8 | 7.2 | 777.2  | 1093.7 | 972.2  | 219.1 | 1346.1 | 179.2 | 1.087 | 1.057 |

|    |     |      |       |       |     |        |        |        |       |        |       |       |       |
|----|-----|------|-------|-------|-----|--------|--------|--------|-------|--------|-------|-------|-------|
| 26 | 268 | 62.3 | 1.040 | 499.8 | 7.7 | 1129.2 | 1610.8 | 1414.1 | 265.9 | 2020.6 | 295.0 | 1.045 | 1.032 |
| 26 | 342 | 70.4 | 1.175 | 349.9 | 5.7 | 266.5  | 375.3  | 164.7  | 38.6  | 234.5  | 23.0  | 0.903 | 0.917 |
| 26 | 342 | 71.8 | 1.153 | 379.8 | 6.2 | 452.7  | 657.0  | 262.6  | 47.5  | 395.2  | 51.2  | 1.103 | 1.057 |
| 26 | 342 | 73.6 | 1.125 | 409.8 | 6.7 | 709.2  | 1073.1 | 416.6  | 54.7  | 652.9  | 63.7  | 0.884 | 0.987 |
| 26 | 342 | 75.4 | 1.098 | 439.8 | 7.2 | 564.7  | 825.2  | 687.5  | 83.9  | 1008.6 | 85.1  | 0.967 | 0.976 |
| 26 | 342 | 77.2 | 1.072 | 469.8 | 7.7 | 755.0  | 1137.4 | 957.9  | 185.1 | 1414.0 | 143.4 | 0.978 | 1.066 |
| 26 | 342 | 79.3 | 1.044 | 499.8 | 8.2 | 1085.7 | 1601.2 | 1333.7 | 123.9 | 2008.3 | 145.1 | 0.894 | 0.949 |
| 27 | 144 | 18.8 | 1.022 | 349.9 | 3.6 | 156.6  | 144.7  | 88.6   | 10.8  | 83.0   | 11.1  | 0.901 | 0.914 |
| 27 | 144 | 18.9 | 1.016 | 379.8 | 3.9 | 258.4  | 237.7  | 153.4  | 16.8  | 147.8  | 24.2  | 0.846 | 0.780 |
| 27 | 144 | 19.4 | 0.992 | 409.8 | 4.3 | 500.9  | 470.3  | 299.7  | 44.3  | 286.4  | 60.2  | 0.905 | 0.798 |
| 27 | 144 | 19.9 | 0.964 | 439.8 | 4.6 | 504.8  | 474.3  | 622.5  | 85.3  | 585.6  | 66.2  | 0.928 | 0.949 |
| 27 | 144 | 20.2 | 0.953 | 469.8 | 4.9 | 655.8  | 618.5  | 802.8  | 123.8 | 769.5  | 130.8 | 1.003 | 0.975 |
| 27 | 144 | 20.6 | 0.933 | 499.7 | 5.2 | 903.3  | 897.7  | 1142.8 | 166.5 | 1150.6 | 186.6 | 1.016 | 1.022 |
| 27 | 231 | 30.0 | 1.027 | 349.8 | 4.4 | 268.3  | 261.0  | 164.9  | 24.9  | 161.0  | 17.5  | 0.913 | 0.908 |
| 27 | 231 | 30.5 | 1.010 | 379.8 | 4.8 | 468.7  | 463.4  | 279.2  | 32.9  | 282.7  | 17.3  | 1.008 | 1.083 |
| 27 | 231 | 31.0 | 0.995 | 409.9 | 5.2 | 742.3  | 715.6  | 464.6  | 38.9  | 454.6  | 43.8  | 0.939 | 0.897 |
| 27 | 231 | 32.1 | 0.961 | 439.8 | 5.5 | 655.5  | 642.4  | 813.2  | 94.3  | 803.9  | 81.5  | 1.033 | 1.011 |
| 27 | 231 | 32.8 | 0.942 | 469.8 | 5.9 | 914.0  | 859.0  | 1148.8 | 109.5 | 1079.4 | 125.1 | 1.005 | 1.004 |
| 27 | 231 | 33.2 | 0.930 | 499.8 | 6.3 | 1149.3 | 1205.0 | 1398.1 | 141.0 | 1523.8 | 131.3 | 0.950 | 1.036 |
| 27 | 317 | 40.9 | 1.037 | 349.9 | 4.9 | 282.3  | 263.6  | 168.2  | 22.2  | 159.8  | 16.9  | 0.943 | 1.007 |
| 27 | 317 | 42.1 | 1.006 | 379.8 | 5.3 | 591.1  | 565.9  | 356.7  | 34.8  | 344.0  | 25.1  | 1.012 | 1.029 |
| 27 | 317 | 43.0 | 0.985 | 409.8 | 5.8 | 966.9  | 964.9  | 610.7  | 55.3  | 599.2  | 40.8  | 0.979 | 1.084 |
| 27 | 317 | 43.9 | 0.966 | 439.8 | 6.2 | 697.2  | 700.0  | 844.1  | 67.2  | 833.6  | 80.0  | 0.990 | 0.948 |
| 27 | 317 | 44.9 | 0.942 | 469.8 | 6.6 | 1002.8 | 984.3  | 1228.1 | 174.9 | 1191.7 | 160.5 | 1.032 | 1.006 |
| 27 | 317 | 46.1 | 0.919 | 499.8 | 7.0 | 1454.6 | 1428.7 | 1821.7 | 189.8 | 1786.9 | 219.1 | 0.985 | 1.039 |
| 27 | 404 | 52.0 | 1.039 | 349.8 | 5.3 | 311.7  | 294.8  | 187.8  | 24.6  | 176.1  | 24.1  | 1.003 | 1.042 |
| 27 | 404 | 53.4 | 1.011 | 379.8 | 5.7 | 592.5  | 591.3  | 359.3  | 41.8  | 362.6  | 44.5  | 0.943 | 0.983 |
| 27 | 404 | 54.1 | 0.998 | 409.8 | 6.2 | 873.5  | 881.8  | 537.9  | 31.2  | 536.3  | 47.4  | 0.804 | 0.983 |
| 27 | 404 | 55.8 | 0.968 | 439.8 | 6.6 | 737.5  | 756.7  | 888.4  | 128.8 | 932.9  | 94.5  | 0.889 | 0.917 |
| 27 | 404 | 56.8 | 0.950 | 469.8 | 7.1 | 1016.2 | 992.2  | 1255.0 | 172.3 | 1239.8 | 168.6 | 0.933 | 0.974 |
| 27 | 404 | 58.7 | 0.920 | 499.7 | 7.5 | 1453.5 | 1483.8 | 1819.3 | 250.5 | 1833.4 | 148.1 | 1.000 | 0.940 |
| 28 | 163 | 24.8 | 1.000 | 349.8 | 4.1 | 111.1  | 100.8  | 64.3   | 8.0   | 57.5   | 6.3   | 0.907 | 0.923 |
| 28 | 163 | 25.5 | 0.971 | 379.9 | 4.5 | 282.0  | 278.1  | 165.6  | 7.7   | 164.9  | 16.7  | 0.960 | 1.100 |
| 28 | 163 | 26.1 | 0.949 | 409.8 | 4.9 | 510.1  | 537.6  | 297.3  | 21.5  | 328.3  | 47.8  | 0.998 | 0.908 |
| 28 | 163 | 26.4 | 0.939 | 439.8 | 5.2 | 393.0  | 388.9  | 483.6  | 80.0  | 493.2  | 66.8  | 0.897 | 0.928 |
| 28 | 163 | 27.2 | 0.913 | 469.8 | 5.6 | 599.3  | 680.1  | 716.6  | 63.7  | 831.9  | 65.2  | 0.903 | 0.947 |
| 28 | 163 | 27.9 | 0.889 | 499.7 | 5.9 | 976.8  | 1049.1 | 1183.2 | 218.5 | 1253.9 | 171.5 | 0.928 | 0.995 |
| 28 | 261 | 40.1 | 0.990 | 349.8 | 4.9 | 204.0  | 206.6  | 117.3  | 11.6  | 123.0  | 16.5  | 0.908 | 0.902 |
| 28 | 261 | 40.9 | 0.970 | 379.8 | 5.3 | 427.4  | 416.3  | 260.2  | 32.5  | 256.7  | 33.4  | 0.902 | 0.895 |
| 28 | 261 | 41.9 | 0.948 | 409.8 | 5.7 | 691.2  | 717.5  | 421.4  | 49.6  | 436.1  | 44.4  | 0.905 | 0.934 |
| 28 | 261 | 42.5 | 0.935 | 439.9 | 6.2 | 517.4  | 565.0  | 614.1  | 85.9  | 696.3  | 56.8  | 0.915 | 0.952 |
| 28 | 261 | 43.8 | 0.908 | 469.7 | 6.6 | 841.8  | 859.6  | 1065.4 | 199.7 | 1066.1 | 217.5 | 0.989 | 0.942 |

|    |     |      |       |       |     |        |        |        |       |        |       |       |       |
|----|-----|------|-------|-------|-----|--------|--------|--------|-------|--------|-------|-------|-------|
| 28 | 261 | 44.3 | 0.896 | 500.0 | 7.0 | 1028.3 | 1140.9 | 1289.6 | 164.0 | 1422.7 | 164.3 | 0.944 | 0.975 |
| 28 | 359 | 54.5 | 1.002 | 349.8 | 5.4 | 197.8  | 206.2  | 114.4  | 14.5  | 124.4  | 15.9  | 0.871 | 0.854 |
| 28 | 359 | 56.4 | 0.968 | 379.9 | 5.8 | 542.7  | 569.0  | 336.6  | 77.4  | 363.0  | 79.8  | 1.107 | 1.096 |
| 28 | 359 | 57.7 | 0.946 | 409.8 | 6.3 | 816.5  | 863.8  | 491.6  | 46.1  | 527.1  | 15.6  | 0.842 | 0.909 |
| 28 | 359 | 58.6 | 0.931 | 439.8 | 6.8 | 637.5  | 654.4  | 777.6  | 180.7 | 805.8  | 182.0 | 1.016 | 1.005 |
| 28 | 359 | 60.3 | 0.906 | 469.8 | 7.2 | 914.2  | 959.0  | 1161.1 | 132.2 | 1188.6 | 167.8 | 1.064 | 1.011 |
| 28 | 359 | 62.4 | 0.875 | 499.8 | 7.7 | 1321.1 | 1463.8 | 1590.0 | 147.4 | 1765.3 | 191.3 | 1.029 | 0.976 |
| 28 | 457 | 69.9 | 0.995 | 349.8 | 5.7 | 242.3  | 256.5  | 141.2  | 17.9  | 152.8  | 15.8  | 0.978 | 1.012 |
| 28 | 457 | 72.1 | 0.965 | 379.8 | 6.2 | 553.2  | 595.8  | 338.2  | 17.0  | 371.6  | 26.4  | 0.910 | 0.951 |
| 28 | 457 | 73.4 | 0.947 | 409.9 | 6.7 | 1001.7 | 1050.6 | 660.1  | 155.1 | 688.3  | 137.9 | 0.776 | 0.788 |
| 28 | 457 | 75.3 | 0.923 | 439.8 | 7.2 | 813.2  | 853.2  | 1048.2 | 245.7 | 1109.0 | 245.3 | 1.062 | 1.065 |
| 28 | 457 | 77.0 | 0.903 | 469.8 | 7.7 | 1033.0 | 1117.6 | 1301.5 | 176.6 | 1394.8 | 199.5 | 1.077 | 1.061 |
| 28 | 457 | 77.9 | 0.892 | 499.8 | 8.1 | 1289.6 | 1378.4 | 1576.7 | 217.6 | 1701.6 | 95.0  | 0.959 | 0.988 |
| 29 | 161 | 25.2 | 0.985 | 349.8 | 4.4 | 53.0   | 63.1   | 28.6   | 3.4   | 36.2   | 4.2   | 0.965 | 0.964 |
| 29 | 161 | 25.5 | 0.973 | 379.8 | 4.7 | 100.9  | 134.4  | 56.4   | 9.1   | 77.8   | 8.4   | 0.750 | 0.977 |
| 29 | 161 | 26.2 | 0.949 | 409.8 | 5.1 | 244.6  | 333.5  | 147.3  | 20.6  | 201.9  | 27.5  | 0.880 | 1.082 |
| 29 | 161 | 26.5 | 0.937 | 439.8 | 5.5 | 190.7  | 260.3  | 216.7  | 37.4  | 308.6  | 57.3  | 0.847 | 0.917 |
| 29 | 161 | 27.2 | 0.913 | 469.8 | 5.8 | 353.7  | 460.9  | 429.3  | 43.8  | 571.0  | 84.3  | 0.936 | 1.014 |
| 29 | 161 | 28.1 | 0.884 | 499.7 | 6.2 | 545.6  | 749.2  | 674.4  | 133.3 | 919.6  | 92.2  | 0.973 | 0.971 |
| 29 | 257 | 40.2 | 0.986 | 349.8 | 5.1 | 89.4   | 110.0  | 48.4   | 9.5   | 62.8   | 8.0   | 0.885 | 0.910 |
| 29 | 257 | 40.8 | 0.970 | 379.8 | 5.5 | 171.4  | 231.8  | 98.6   | 6.0   | 135.4  | 17.1  | 0.990 | 1.040 |
| 29 | 257 | 41.6 | 0.951 | 409.8 | 6.0 | 346.6  | 425.8  | 204.7  | 15.4  | 258.4  | 13.6  | 1.157 | 1.014 |
| 29 | 257 | 42.6 | 0.929 | 439.8 | 6.4 | 305.7  | 391.2  | 353.4  | 21.7  | 470.7  | 27.7  | 0.828 | 0.894 |
| 29 | 257 | 43.1 | 0.918 | 469.8 | 6.8 | 427.6  | 561.6  | 512.0  | 78.2  | 700.8  | 87.7  | 0.927 | 1.017 |
| 29 | 257 | 44.8 | 0.885 | 499.8 | 7.3 | 722.7  | 925.2  | 884.1  | 100.0 | 1136.9 | 138.4 | 0.997 | 1.038 |
| 29 | 354 | 55.3 | 0.987 | 349.9 | 5.5 | 108.4  | 133.4  | 60.0   | 8.5   | 78.2   | 13.7  | 0.762 | 0.842 |
| 29 | 354 | 56.0 | 0.974 | 379.8 | 6.0 | 206.6  | 262.8  | 122.1  | 13.7  | 155.1  | 14.0  | 0.898 | 1.011 |
| 29 | 354 | 56.9 | 0.959 | 409.8 | 6.5 | 354.0  | 464.7  | 204.7  | 24.8  | 275.7  | 22.9  | 0.864 | 0.907 |
| 29 | 354 | 58.7 | 0.930 | 439.7 | 7.0 | 355.5  | 462.2  | 410.0  | 48.7  | 547.1  | 61.3  | 0.865 | 0.896 |
| 29 | 354 | 60.1 | 0.908 | 469.8 | 7.4 | 547.9  | 711.9  | 649.4  | 67.5  | 865.4  | 112.8 | 0.966 | 0.969 |
| 29 | 354 | 61.5 | 0.888 | 499.8 | 7.9 | 764.2  | 964.2  | 914.5  | 96.3  | 1143.0 | 101.8 | 0.952 | 0.984 |
| 29 | 450 | 70.3 | 0.987 | 349.9 | 5.8 | 124.7  | 151.4  | 72.2   | 11.5  | 90.8   | 13.0  | 0.941 | 0.980 |
| 29 | 450 | 71.2 | 0.975 | 379.9 | 6.4 | 224.7  | 289.6  | 135.1  | 28.3  | 175.8  | 35.2  | 0.855 | 0.931 |
| 29 | 450 | 73.2 | 0.948 | 409.8 | 6.9 | 449.6  | 580.3  | 268.2  | 20.9  | 351.9  | 12.6  | 0.969 | 0.976 |
| 29 | 450 | 74.7 | 0.928 | 439.8 | 7.4 | 389.9  | 507.5  | 462.4  | 70.6  | 619.9  | 41.3  | 0.930 | 0.972 |
| 29 | 450 | 75.9 | 0.914 | 469.8 | 7.9 | 574.3  | 702.8  | 713.5  | 190.1 | 878.4  | 142.8 | 0.997 | 0.991 |
| 29 | 450 | 78.3 | 0.886 | 499.8 | 8.4 | 894.6  | 1149.0 | 1123.8 | 177.3 | 1459.7 | 276.5 | 0.952 | 0.988 |
